# Supplementary material
Source: publisher figshare collection journal article supplement (https://geolsoc.figshare.com/ndownloader/files/6863769)
Supplement: Supplementary file 1 [file 6863769]

## Sheet: Chapter 4 - Nile Hinterland
Anchored: Data regressed and anchored to a common Pb value of 0.867 ± 0.017. n.d. = not determined											Data not common-Pb corrected									Ages						Discordance		Conc within Unc?		Reasoning	Concordant + Pbc Anchored
											Tera-Wasserberg plot				Wetherill plot													Younger (Pb/U<X)	Older (Pb/U>X)
Date	MS	Mount	Sample	Grain	204Pb	206Pb	207Pb	208Pb	232Th	238U	238U/206Pb	1σ %	207Pb/206Pb	1σ %	207Pb/235U	1σ %	206Pb/238U	1σ %	Rho	207Pb/206Pb	±2σ	206Pb/238U	±2σ	207Pb/235U	±2σ	6-38/7-6	6-38/7-35				Pref	2s abs
Sample ETH02A - Blue Nile, Aranja Bridge, Ethiopia (modern river sand)
2012-08-14	Attom	NDR1	ETH2A	1	132.235	2338.1	1999.44	4589.38	4899.72	4155.46	1.821	3.49257	0.718286	2.09727	54.3861	4.07389	0.549148	3.49257	0.857306	4767.1	30.0844	2821.63	157.677	4076.08	78.1513	40.8103	30.776	1176.3	2103.14	7/6 > 0.5
2012-08-14	Attom	NDR1	ETH2A	5	3654.85	65605.9	59750.4	140284	1023.02	1852.44	0.0303096	2.82302	0.889895	0.956162	4048.18	2.98055	32.9928	2.82302	0.947147	5072.26	13.5284	22731	343.921	8434.04	58.7785	-348.144	-169.515	-14355.8	-17314.8	7/6 > 0.5
2012-08-14	Attom	NDR1	ETH2A	6	191.815	1401	1030.79	2443.76	185.817	1845.06	1.39944	4.56706	0.703879	4.02374	69.3498	6.08675	0.714571	4.56706	0.750328	4738.01	57.7987	3475.67	240.844	4318.91	115.076	26.6429	19.5244	728.167	1503.19	7/6 > 0.5
2012-08-14	Attom	NDR1	ETH2A	10	-32.0261	753.997	403.318	1230.92	129.534	1251.66	1.46198	24.7922	0.730263	9.97285	68.8716	26.7228	0.684005	24.7922	0.927753	4790.8	142.896	3359.71	1182.84	4311.99	429.689	29.8717	22.0844	522.587	2613.93	7/6 > 0.5
2012-08-14	Attom	NDR1	ETH2A	18	-90.1627	156.374	164.208	252.33	204.782	37.0947	-0.0377407	44.696	2.81845	32.6145	-10296.8	55.3302	-26.4966	44.696	0.807804	6656.89	437.572									Failed
2012-11-15	Attom	NDR2	ETH2A	3	125.918	71.3476	47.446	140.489	-1.43678	-0.718391	-0.0125168	24.87	0.165535	55.7353	-1823.47	61.0323	-79.8926	24.87	0.407489	2512.24	937.046									Failed
2012-11-15	Attom	NDR2	ETH2A	6	112.083	2833.6	2365.16	5550.66	3.56322	64.8682	-0.00191156	29.9483	0.837411	2.6287	-60402.1	30.0635	-523.133	29.9483	0.99617	4986.1	37.332									Failed
2012-11-15	Attom	NDR2	ETH2A	12	135.56	48.2155	25.7137	130.014	-1.43678	4.76407	-0.0454127	96.4198	0.150601	135.128	-457.248	166.001	-22.0203	96.4198	0.580839	2351.99	2309.18									Failed
2012-11-15	Attom	NDR2	ETH2A	15	29.2638	1147.27	931.538	2080.27	-1.43678	624.288	0.605135	6.76988	0.816631	6.27413	186.069	9.23017	1.65252	6.76988	0.733452	4950.38	89.2445	6288.55	522.052	5311.96	171.168	-27.0316	-18.3849	-1147.76	-816.116	7/6> 0.5
2012-11-15	Attom	NDR2	ETH2A	16	270.137	2348.01	1699.85	4261.38	2940.66	6486.75	3.08159	4.34328	0.70049	2.68182	31.3422	5.10453	0.324508	4.34328	0.850867	4731.08	38.5356	1811.71	135.755	3529.85	95.792	61.7062	48.6746	1622.35	3055.13	7/6> 0.5
2012-11-15	Attom	NDR2	ETH2A	17	271.51	2323.56	1723.5	4204.9	52.052	1798.3	0.862873	7.20649	0.795203	3.39513	127.067	7.9662	1.15892	7.20649	0.904633	4912.53	48.3751	4961.21	480.403	4927.2	149.021	-0.990968	-0.69025	-183.031	431.722	7/6> 0.5
2012-11-15	Attom	NDR2	ETH2A	18	44.9813	7.15455	32.6075	18.8379	-0.527427	4.01803	0.177503	440.744	0.340245	33.8025	264.293	442.038	5.63369	440.744	0.997072	3663.18	516.509	12197.7	13785.2	5666.69	2318.26	-232.98	-115.252	-8849.23	5250.71	206 counts < 1000
2012-11-15	Attom	NDR2	ETH2A	21	77.6114	542.96	380.605	617.536	24.9828	2052.08	4.69785	6.51009	1.82238	21.8549	53.4863	22.8039	0.212864	6.51009	0.285482	6067.12	298.163	1244.06	145.65	4059.45	375.672	79.4951	69.3541	2439.72	4968.71	7/6> 0.5
2012-11-15	Attom	NDR2	ETH2A	23	121.462	1245.18	1618.72	2496.11	6.16901	72.5859	-0.00677923	30.6524	0.861913	5.62873	-17530.1	31.1649	-147.509	30.6524	0.983555	5027.02	79.7947									Failed
2012-11-15	Attom	NDR2	ETH2A	28	-15.7965	660.046	775.948	1469.93	80.1465	52.0089	-0.00361552	25.3109	0.805387	5.74684	-30713.9	25.9551	-276.586	25.3109	0.97518	4930.65	81.8165									Failed
2012-11-15	Attom	NDR2	ETH2A	29	-84.8536	65.7533	18.7949	50.9175	10.7573	278.069	4.15177	28.4382	-0.227993	78.694	-7.57165	83.6748	0.240861	28.4382	0.339865			1391.17	675.08							Failed
2012-11-16	Attom	NDR2	ETH2A	33	27.5719	96.5133	93.6114	204.645	-0.841751	6.46868	-0.0303933	31.8194	0.667626	37.272	-3028.7	49.0069	-32.902	31.8194	0.649284	4661.92	537.368									Failed
2012-11-16	Attom	NDR2	ETH2A	40	2737.88	51003.9	42396.9	104568	22113.9	21406.6	0.468664	1.95197	0.806893	1.24131	237.386	2.31323	2.13373	1.95197	0.843828	4933.31	17.6702	7363.24	169.118	5558.1	45.7337	-49.2555	-32.4777	-1850.88	-2260.81	7/6> 0.5
2012-11-16	Attom	NDR2	ETH2A	48	33.9609	1697.91	233.49	369.433	139.958	7823.8	-0.000957396	14.1499	0.137716	9.32542	-19833.3	16.9465	-1044.5	14.1499	0.834976	2197.9	162.005									Failed
2012-11-16	Attom	NDR2	ETH2A	49	27.4993	229.919	130.141	296.439	16.397	-0.801283	-0.00460778	12.1778	0.498929	14.4573	-14929.6	18.9027	-217.024	12.1778	0.644236	4237.39	213.152									Failed
2012-11-16	Attom	NDR2	ETH2A	50	-15.6166	461.728	115.096	191.632	5.92949	-0.801283	-0.002315	9.30127	0.254666	9.37132	-15167.8	13.2036	-431.966	9.30127	0.704449	3213.3	148.025									Failed
2012-11-16	Attom	NDR2	ETH2A	54	-75.1236	574.442	107.172	249.744	-2.40385	-0.801283	-0.00154036	4.13329	0.174475	12.0633	-15617.5	12.7518	-649.2	4.13329	0.324134	2600.29	201.073									Failed
2012-11-16	Attom	NDR2	ETH2A	55	146.864	1449.71	147.648	167.428	4.5406	10676.2	-0.00179169	27.3411	0.0951974	11.0375	-7325.95	29.4849	-558.133	27.3411	0.92729	1531.14	207.822									Failed
2012-11-16	Attom	NDR2	ETH2A	56	-33.5163	1331.72	233.086	459.673	1403.88	8253.72	-0.00116469	16.798	0.155716	6.95798	-18434.1	18.182	-858.595	16.798	0.923879	2408.9	118.206									Failed
2012-11-16	Attom	NDR2	ETH2A	58	118.922	1505.43	1208.61	2638.94	782.999	6302.65	-0.00309944	15.8783	0.607705	7.82875	-27034	17.7034	-322.639	15.8783	0.896908	4525.88	113.644									Failed
2012-11-16	Attom	NDR2	ETH2A	61	63.9408	1098.15	548.692	1449.57	1741.02	2652.44	-0.00105449	8.4956	0.492162	3.96736	-64352.7	9.37631	-948.325	8.4956	0.906071	4217.24	58.5598									Failed
2014-06-05	Attom	NDR5	ETH2A	3	108.364	2180.68	340.167	542.097	15.957	12709.9	-0.00168171	14.7607	0.122621	7.1138	-10049	16.3855	-594.634	14.7607	0.900839	1994.71	126.446									Failed
2014-06-05	Attom	NDR5	ETH2A	5	48.9326	5398.98	418.778	306.536	65.3108	42018.8	-0.00329925	29.8083	0.0761006	2.83686	-3178.91	29.943	-303.099	29.8083	0.995502	1097.72	56.7705									Failed
2014-06-05	Attom	NDR5	ETH2A	8	24.9142	5809.27	385.917	68.3407	-3.60825	39194.6	-0.00189613	24.5861	0.0652288	2.32435	-4741.09	24.6957	-527.391	24.5861	0.995561	781.724	48.8447									Failed
2014-06-05	Attom	NDR5	ETH2A	9	-88.1893	8185.84	721.202	508.396	259.774	49189.5	-0.00315849	39.4116	0.0865651	1.73785	-3777.2	39.4499	-316.607	39.4116	0.999029	1350.83	33.533									Failed
2014-06-05	Attom	NDR5	ETH2A	12	-82.3042	2895.09	178.262	11.8653	-3.60825	33477.9	-0.00309497	22.068	0.0599217	3.32199	-2668.29	22.3166	-323.105	22.068	0.988859	600.748	71.9148									Failed
2014-06-05	Attom	NDR5	ETH2A	13	-86.0194	2547.48	1649.19	4184.25	317.491	-1.54639	-0.000853891	13.2107	0.469898	8.46462	-75841.6	15.6899	-1171.11	13.2107	0.841989	4149.44	125.429									Failed
2014-06-05	Attom	NDR5	ETH2A	17	-114.921	78.3762	15.914	10.1473	-3.60825	-1.54639	-0.0245597	13.3861	0.0399067	110.73	-223.938	111.536	-40.7171	13.3861	0.120016	-356.991	2862.84									Failed
2014-06-05	Attom	NDR5	ETH2A	18	-44.9778	4053.57	330.036	302.536	295.024	32681	-0.00201711	21.9275	0.082048	2.72366	-5605.88	22.096	-495.758	21.9275	0.992374	1246.66	53.3334									Failed
2014-06-05	Attom	NDR5	ETH2A	19	71.823	362.769	24.379	2.50556	14.8128	-1.54639	-0.00662463	8.96286	0.0671681	14.212	-1397.36	16.8022	-150.952	8.96286	0.533435	842.991	295.75									Failed
2014-06-05	Attom	NDR5	ETH2A	20	-45.1747	4058.24	482.237	668.016	538.344	34892.5	-0.00436238	36.4439	0.116397	6.37054	-3677.25	36.9965	-229.233	36.4439	0.985063	1901.61	114.483									Failed
2014-06-05	Attom	NDR5	ETH2A	22	-191.815	814.824	211.646	379.304	68.9946	3684.44	-0.00272936	7.17981	0.278881	4.69982	-14082	8.58126	-366.386	7.17981	0.836685	3356.68	73.4163									Failed
2014-06-05	Attom	NDR5	ETH2A	23	-58.755	1189.99	727.876	2027.91	2192.63	-1.54639	-0.0017313	9.53827	0.586635	3.43017	-46698.3	10.1363	-577.6	9.53827	0.941001	4475.24	49.9237									Failed
2014-06-05	Attom	NDR5	ETH2A	24	-161.669	11.4929	7.80897	-8.37228	-3.60825	-1.54639	-0.144273	70.1262	0.0798541	80.0089	-76.2813	106.391	-6.9313	70.1262	0.659135	1193.39	1578.77									Failed
2014-06-05	Attom	NDR5	ETH2A	25	-3.24262	197.014	21.8209	-5.35054	-3.60825	-1.54639	-0.00992849	9.43701	0.181814	26.5743	-2523.76	28.2001	-100.72	9.43701	0.334644	2669.48	440.026									Failed
2012-11-15	Attom	NDR2	ETH2A	10	1236.12	1242941	95505.9	118941	6360801	2.94895e+07	26.437	1.50716	0.0766437	0.63657	0.399728	1.63608	0.0378257	1.50716	0.921203	1111.04	12.7137	239.342	7.07835	341.451	9.44418	78.4578	29.9046	92.6654	878.773	Anchored
2012-11-16	Attom	NDR2	ETH2A	45	437.17	534420	38897.7	25948.6	2698161	1.76858e+07	37.0818	2.18056	0.0712529	1.23282	0.264938	2.50493	0.0269674	2.18056	0.870507	963.76	25.1758	171.541	7.37821	238.638	10.5989	82.2009	28.1169	56.4987	799.597	?Not rutile?
2014-06-05	Attom	NDR5	ETH2A	4	-120.224	8697.37	525.199	-15.2577	16.8143	69560.2	8.48106	7.88826	0.0597504	1.92813	0.97095	8.12049	0.11791	7.88826	0.971402	594.548	41.7838	718.522	106.386	688.953	78.1525	-20.8517	-4.29182	-107.721	-230.36	Imprecise
2014-06-05	Attom	NDR5	ETH2A	10	56.3868	5478.01	343.616	-31.6601	-3.60825	38042.7	7.50261	7.71152	0.0602588	2.78292	1.10691	8.19831	0.133287	7.71152	0.940624	612.88	60.1227	806.589	115.885	756.688	83.9043	-31.6064	-6.59469	-133.806	-309.594	Imprecise
2014-06-05	Attom	NDR5	ETH2A	14	349.945	21231.4	6564.03	14663.6	6632.97	123232	5.58696	7.04488	0.308747	1.95144	7.61611	7.31016	0.178988	7.04488	0.963711	3514.67	30.1305	1061.44	136.437	2186.76	123.41	69.7996	51.4605	1001.91	2316.79	Imprecise
2014-06-05	Attom	NDR5	ETH2A	15	-8.66954	9384.54	693.542	451.243	863.547	80504.3	9.60952	7.84634	0.0740133	1.69132	1.06148	8.02656	0.104063	7.84634	0.977547	1041.83	34.1308	638.178	94.6514	734.555	80.6423	38.7445	13.1204	15.7344	309	Imprecise
2014-06-05	Attom	NDR5	ETH2A	16	98.2534	7093.21	499.886	198.391	83.7159	61305.5	10.7197	6.80561	0.069708	2.80833	0.896205	7.36227	0.0932865	6.80561	0.92439	919.763	57.7413	574.945	74.4372	649.697	68.3129	37.4899	11.5057	6.43956	270.381	Imprecise
2014-06-05	Attom	NDR5	ETH2A	6	-17.3834	5441.62	321.65	-18.3872	-3.60825	57457.4	12.1763	7.80818	0.0584773	2.46705	0.661879	8.18865	0.0821269	7.80818	0.953537	547.692	53.887	508.805	75.9529	515.763	64.1591	7.10007	1.34897	-57.2016	-37.0664	Imprecise
2014-06-05	Attom	NDR5	ETH2A	7	-233.264	10557.2	705.561	85.8268	369.052	85738.4	8.58989	7.6259	0.0661351	1.95271	1.06109	7.87194	0.116416	7.6259	0.968745	810.655	40.8452	709.902	101.717	734.359	79.134	12.4287	3.33037	-54.6771	-0.963777	Imprecise
2014-06-05	Attom	NDR5	ETH2A	11	-83.3228	22517.8	1396.45	-25.078	-3.60825	189333	9.11787	5.07032	0.0609827	1.37855	0.921762	5.25438	0.109675	5.07032	0.96497	638.622	29.655	670.858	64.2876	663.291	49.932	-5.04776	-1.14085	-57.4991	-96.5237	Imprecise
2012-08-14	Attom	NDR1	ETH2A	17	47.2959	2633.55	393.951	513.737	138.413	23207.1	9.66895	3.01561	0.146078	4.05885	2.08308	5.05649	0.103424	3.01561	0.596384	2299.74	69.7431	634.443	36.3393	1143.25	67.1119	72.4124	44.5054	441.696	1701.64	Imprecise
2012-11-16	Attom	NDR2	ETH2A	46	-26.4182	4006.36	369.121	401.876	556.276	34786.1	9.53425	8.38166	0.0898391	4.28756	1.29921	9.41464	0.104885	8.38166	0.890279	1421.25	81.9322	642.973	101.775	845.374	102.665	54.7601	23.9421	99.7352	880.054	Imprecise
2012-11-15	Attom	NDR2	ETH2A	7	104.312	259.49	23.3218	9.14567	10.3557	2387.76	9.90395	5.85269	0.142402	26.4518	1.98247	27.0915	0.10097	5.85269	0.216034	2255.84	456.654	620.09	68.8334	1109.56	312.334	72.5118	44.1141	177.14	1704.58	206 counts < 1000
2012-08-14	Attom	NDR1	ETH2A	9	-11.8612	8741.06	519.714	33.1859	-2.81955	102022	12.5696	2.4162	0.0573232	2.39797	0.628796	3.40416	0.0795569	2.4162	0.709779	503	52.7786	493.478	22.9161	495.346	26.3431	1.89314	0.377134	-24.475	32.4386	Conc within Unc	493.478	22.9161
2012-08-14	Attom	NDR1	ETH2A	13	-73.18	15024.3	927.356	25.8911	-3.55192	156668	11.3396	2.45302	0.0599125	2.25495	0.728487	3.33198	0.0881867	2.45302	0.736204	599.441	48.8261	544.804	25.5792	555.665	28.1248	9.11454	1.95448	-17.2644	80.2155	Conc within Unc	544.804	25.5792
2012-08-14	Attom	NDR1	ETH2A	16	15.2454	7328.02	488.44	186.28	111.383	67989.9	10.143	2.73551	0.0648918	3.08343	0.882114	4.12196	0.0985902	2.73551	0.663642	769.883	64.9201	606.142	31.5733	642.124	38.4933	21.2684	5.60363	-2.51099	195.315	Conc within Unc	606.142	31.5733
2012-08-14	Attom	NDR1	ETH2A	19	-8.59696	64388	4135.28	599.235	1803.18	575831	9.63865	2.33449	0.0628561	1.40566	0.89915	2.72502	0.103749	2.33449	0.856688	702.407	29.9217	636.342	28.2295	651.273	25.8677	9.40547	2.29263	-10.9365	94.2941	Conc within Unc	636.342	28.2295
2012-08-14	Attom	NDR1	ETH2A	22	-65.6017	30140.5	1946.45	289.585	68.1149	267736	9.59784	2.31284	0.0625112	1.6339	0.898019	2.83176	0.10419	2.31284	0.816751	690.683	34.8469	638.918	28.0757	650.668	26.8501	7.49484	1.80588	-15.0998	79.8413	Conc within Unc	638.918	28.0757
2012-08-14	Attom	NDR1	ETH2A	23	-33.6582	11421.5	704.474	5.89919	-3.55192	123199	11.5667	2.6246	0.0609955	2.75041	0.727092	3.80174	0.0864551	2.6246	0.690367	638.108	59.171	534.538	26.871	554.845	31.9931	16.2308	3.66	-11.6858	130.441	Conc within Unc	534.538	26.871
2012-08-14	Attom	NDR1	ETH2A	24	-24.4796	11900.7	707.485	56.9258	-3.55192	134999	12.4213	2.48739	0.0580902	2.56243	0.644819	3.57116	0.0805071	2.48739	0.696523	532.179	56.118	499.149	23.8504	505.286	28.04	6.20668	1.21452	-21.9032	56.881	Conc within Unc	499.149	23.8504
2012-11-16	Attom	NDR2	ETH2A	32	87.4258	3708.25	220.709	19.9037	4.80797	38423	11.8614	2.3921	0.059488	5.17368	0.691502	5.69992	0.0843068	2.3921	0.419673	584.028	112.315	521.778	23.9349	533.703	46.251	10.6586	2.23423	-34.3269	86.1841	Conc within Unc	521.778	23.9349
2012-11-16	Attom	NDR2	ETH2A	35	-5.58838	116738	7180.55	106.935	11.8701	992287	9.63025	1.89082	0.0607926	1.74158	0.870391	2.57066	0.103839	1.89082	0.735538	630.934	37.5123	636.87	22.892	635.779	24.0072	-0.940856	-0.171605	-25.0983	16.9558	Conc within Unc	636.87	22.892
2012-11-16	Attom	NDR2	ETH2A	36	98.8228	25096.7	1584.38	122.449	55.4856	228551	10.2905	1.91702	0.061562	2.124	0.824857	2.86118	0.0971772	1.91702	0.670011	657.965	45.5446	597.845	21.8538	610.754	25.9297	9.13731	2.11372	-13.0201	81.9741	Conc within Unc	597.845	21.8538
2012-11-16	Attom	NDR2	ETH2A	41	-8.286	18930.7	1278.04	85.9761	6.85542	127827	7.4755	2.09867	0.0675682	1.88317	1.24625	2.8197	0.13377	2.09867	0.744287	854.402	39.1179	809.339	31.8459	821.709	31.2826	5.27423	1.50538	-18.9127	76.9091	Conc within Unc	809.339	31.8459
2012-11-16	Attom	NDR2	ETH2A	43	-13.089	1370.18	101.948	83.4758	10.0962	10551.4	8.64896	3.04322	0.0760354	9.99536	1.21214	10.4484	0.115621	3.04322	0.291263	1095.1	200.102	705.309	40.5355	806.174	110.077	35.5942	12.5116	-9.21134	430.328	Conc within Unc	705.309	40.5355
2012-11-16	Attom	NDR2	ETH2A	44	55.4385	22126.8	1342.21	93.2491	43.8083	218842	11.3396	2.1034	0.0604201	2.41443	0.734657	3.20215	0.0881864	2.1034	0.656872	617.684	52.1199	544.802	21.9396	559.283	27.1737	11.7991	2.58912	-12.6932	94.8207	Conc within Unc	544.802	21.9396
2012-11-16	Attom	NDR2	ETH2A	47	-25.889	3749.95	259.467	65.9749	-2.40385	34271.7	10.2404	8.63507	0.0690945	4.08063	0.930305	9.55071	0.097652	8.63507	0.904129	900.634	84.1513	600.634	98.2913	667.795	89.4194	33.3099	10.0572	-22.2579	398.292	Conc within Unc	600.634	98.2913
2012-11-16	Attom	NDR2	ETH2A	51	55.8029	6730.87	464.539	73.3283	40.049	55055.3	8.19271	6.50088	0.0685484	3.86495	1.15364	7.56302	0.12206	6.50088	0.859561	884.251	79.9081	742.408	90.5364	778.962	79.1088	16.041	4.69261	-42.5551	232.379	Conc within Unc	742.408	90.5364
2012-11-16	Attom	NDR2	ETH2A	52	53.7071	130930	8108.21	144.195	8.8956	1.10935e+06	9.45911	2.37837	0.060795	1.56914	0.886173	2.84936	0.105718	2.37837	0.834703	631.019	33.7977	647.833	29.2514	644.311	26.8284	-2.66466	-0.546577	-30.35	12.437	Conc within Unc	647.833	29.2514
2012-11-16	Attom	NDR2	ETH2A	53	13.8353	21741.2	1352.4	232.65	563.188	183509	9.03215	4.35145	0.0614165	2.33536	0.937551	4.93852	0.110716	4.35145	0.881124	652.886	50.1188	676.902	55.6815	671.599	47.4047	-3.67843	-0.789591	-52.7076	31.6656	Conc within Unc	676.902	55.6815
2012-11-16	Attom	NDR2	ETH2A	57	9.99775	13239.7	898.783	284.552	11.2325	110047	9.22357	4.52745	0.06649	2.05201	0.993937	4.97077	0.108418	4.52745	0.910815	820.9	42.8524	663.553	56.8439	700.727	49.1118	19.1676	5.30501	-11.9382	214.191	Conc within Unc	663.553	56.8439
2012-11-16	Attom	NDR2	ETH2A	59	50.5376	20319.9	1264.89	35.2722	-2.40385	162252	8.51826	4.27344	0.0608001	2.06854	0.984136	4.74775	0.117395	4.27344	0.900098	631.203	44.5527	715.552	57.6269	695.724	46.7304	-13.3633	-2.85	-66.5585	-26.7225	Conc within Unc	715.552	57.6269
2012-11-16	Attom	NDR2	ETH2A	60	10.3152	12530	804	108.401	-2.40385	115305	9.71779	4.60141	0.0641227	2.09238	0.9098	5.0548	0.102904	4.60141	0.910305	744.731	44.2334	631.405	55.1158	656.951	47.7604	15.217	3.88855	-22.2145	168.441	Conc within Unc	631.405	55.1158
2012-08-14	Attom	NDR1	ETH2A	2	83.8838	5128.6	1948.49	4311.1	10519.7	26949.3	5.72663	3.07447	0.364462	2.8341	8.77516	4.18144	0.174623	3.07447	0.735265	3767.88	43.0018	1037.53	58.6601	2314.92	73.5026	72.4638	55.1806	1203.88	2789	Anchored	667	50
2012-08-14	Attom	NDR1	ETH2A	3	72.303	6518.16	647.392	628.467	276.99	50837.1	8.58148	2.55621	0.096507	2.53611	1.55059	3.60084	0.11653	2.55621	0.709892	1556.82	47.59	710.56	34.3048	950.73	43.5093	54.3582	25.2616	196.66	880.563	Anchored	682	34
2012-08-14	Attom	NDR1	ETH2A	4	-102.455	16933.8	1248.37	743.625	33.9452	182782	11.6975	2.58023	0.0723675	2.99779	0.853008	3.95529	0.0854887	2.58023	0.65235	995.379	60.923	528.801	26.1463	626.299	36.3182	46.8744	15.5673	61.1794	492.724	Anchored	520	26
2012-08-14	Attom	NDR1	ETH2A	7	55.7806	5752.21	2173.26	4857.5	2612.6	32463.8	5.96	2.68007	0.368288	2.18424	8.52006	3.45741	0.167785	2.68007	0.775168	3783.71	33.107	999.897	49.456	2288.07	60.9691	73.5737	56.2995	1227.2	2833.27	Anchored	637	41
2012-08-14	Attom	NDR1	ETH2A	8	3.07248	15500.2	1176.32	415.801	-2.81955	138278	9.77709	2.38729	0.0742155	2.67205	1.04661	3.58316	0.10228	2.38729	0.666254	1046.43	53.8845	627.756	28.4966	727.203	36.5458	40.0095	13.6753	62.9012	447.166	Anchored	618	28
2012-08-14	Attom	NDR1	ETH2A	11	-59.5407	9129.82	1013.32	1160.57	400.298	91580.9	10.901	2.45394	0.109119	2.44613	1.38018	3.46488	0.0917349	2.45394	0.708233	1783.93	44.5912	565.79	26.5299	880.514	40.0028	68.2841	35.7433	274.722	1244.67	Anchored	532	25
2012-08-14	Attom	NDR1	ETH2A	12	-72.5465	926.388	73.0684	26.3475	-3.55192	7971.27	9.44552	3.86834	0.0808833	6.49635	1.18069	7.56086	0.10587	3.86834	0.511627	1217.73	127.738	648.72	47.5707	791.633	79.9047	46.727	18.053	63.0086	616.578	Anchored	633	47
2012-08-14	Attom	NDR1	ETH2A	14	121.823	18417.7	1155.42	226.554	142.516	207078	12.183	2.32659	0.0617868	1.83477	0.699267	2.96301	0.0820817	2.32659	0.785213	665.774	39.292	508.536	22.7138	538.353	24.4643	23.6173	5.53855	5.35271	179.952	Anchored	506	23
2012-08-14	Attom	NDR1	ETH2A	15	87.5284	7662.46	658.294	503.906	2255.99	76330.4	10.7673	2.62791	0.0849808	3.70284	1.08822	4.54059	0.0928737	2.62791	0.578759	1314.23	71.8159	572.51	28.7285	747.636	46.9497	56.4375	23.4239	128.176	770.445	Anchored	555	28
2012-08-14	Attom	NDR1	ETH2A	20	-21.2227	9486.09	970.385	1122.51	1748.67	74226.8	8.51118	2.89357	0.101654	3.34914	1.64679	4.426	0.117493	2.89357	0.653766	1653.71	62.0606	716.115	39.1048	988.32	54.4372	56.6965	27.5422	217.768	976.702	Anchored	683	38
2012-08-14	Attom	NDR1	ETH2A	21	-17.8129	3254.44	403.883	466.726	12.7524	27753.7	9.15283	3.64225	0.122361	5.2357	1.84327	6.37797	0.109256	3.64225	0.571066	1990.13	93.1129	668.425	46.0869	1061.03	80.6762	66.413	37.0022	311.927	1367.79	Anchored	620	44
2012-08-14	Attom	NDR1	ETH2A	25	72.7874	16138.7	1097.27	307.82	105.539	161573	10.7107	2.4093	0.0668847	2.69362	0.861018	3.61391	0.093365	2.4093	0.666675	833.249	56.1408	575.408	26.4708	630.679	33.3992	30.9441	8.76375	21.8719	284.313	Anchored	570	26
2012-11-15	Attom	NDR2	ETH2A	1	26.0738	29806.2	2497.16	1243.14	11.0632	192677	7.07551	2.30191	0.0795602	2.97137	1.55039	3.7587	0.141333	2.30191	0.612422	1185.22	58.7021	852.194	36.6465	950.647	45.3725	28.0982	10.3564	53.0804	369.671	Anchored	840	37
2012-11-15	Attom	NDR2	ETH2A	2	80.0122	3470.43	1309.55	2326.39	70.736	20868.5	6.67667	2.47444	0.300935	6.09961	6.21461	6.5824	0.149775	2.47444	0.375917	3474.34	94.4537	899.704	41.4244	2006.51	109.071	74.1044	55.1607	997.731	2616.07	Anchored	645	51
2012-11-15	Attom	NDR2	ETH2A	4	73.3004	2215.9	442.783	843.234	57.8853	15076	7.66351	1.91504	0.189304	5.10268	3.40591	5.4502	0.130489	1.91504	0.35137	2735.38	83.9729	790.652	28.4363	1505.76	82.1455	71.0954	47.4915	632.961	1973.17	Anchored	672	31
2012-11-15	Attom	NDR2	ETH2A	5	299.781	35793.8	5097.66	7230.87	31.4158	319285	10.1689	1.63407	0.143676	4.33625	1.94811	4.63393	0.0983394	1.63407	0.352632	2271.21	74.7363	604.67	18.8354	1097.8	60.3542	73.3768	44.9197	432.772	1685.38	Anchored	544	19
2012-11-15	Attom	NDR2	ETH2A	8	57.414	4989.54	609.16	703.135	-1.43678	41103.5	9.26059	2.32442	0.119834	4.77138	1.7842	5.30745	0.107985	2.32442	0.437955	1952.94	85.2252	661.032	29.1413	1039.71	66.8221	66.152	36.4216	311.857	1321.05	Anchored	615	29
2012-11-15	Attom	NDR2	ETH2A	9	-56.8164	1121.6	396.957	840.603	-1.43678	5493.33	5.78449	3.22922	0.333396	4.50004	7.94688	5.53879	0.172876	3.22922	0.583019	3632.08	68.9086	1027.94	61.0758	2225.01	95.2931	71.6984	53.8008	1101.78	2665.22	Anchored	700	59
2012-11-15	Attom	NDR2	ETH2A	11	140.594	7968.97	848.664	1030.79	-1.43678	71317.8	10.2757	1.7565	0.105799	3.3443	1.41962	3.77752	0.0973166	1.7565	0.464989	1727.42	61.3944	598.664	20.0529	897.202	44.0392	65.3435	33.2744	254.499	1148.81	Anchored	565	20
2012-11-15	Attom	NDR2	ETH2A	13	25.8726	964.136	419.357	933.95	-1.43678	4421.15	5.41499	4.43294	0.396704	6.11237	10.1011	7.55063	0.184673	4.43294	0.587096	3895.96	91.978	1092.45	88.4831	2444.08	130.734	71.9594	55.3021	1220.89	2891.99	Anchored	660	88
2012-11-15	Attom	NDR2	ETH2A	14	56.9194	7339.42	1560.59	2889.84	17.794	46907.7	7.26957	2.39004	0.200425	5.32449	3.80141	5.83631	0.13756	2.39004	0.409513	2828.93	86.8792	830.849	37.1552	1593.04	89.751	70.6302	47.8452	672.444	2035.23	Anchored	696	39
2012-11-15	Attom	NDR2	ETH2A	19	9.62075	14800.6	1123.96	528.194	-0.527427	131582	9.91883	1.50188	0.0750556	2.88998	1.04334	3.25693	0.100818	1.50188	0.461132	1069.09	58.0812	619.203	17.7096	725.576	33.2222	42.0811	14.6605	73.1505	467.593	Anchored	608	18
2012-11-15	Attom	NDR2	ETH2A	20	86.1699	20714.9	1592.88	628.313	883.824	167847	9.14571	1.46452	0.0780672	1.78002	1.17694	2.30506	0.109341	1.46452	0.635352	1147.69	35.3592	668.919	18.5838	789.885	24.9972	41.7161	15.3144	95.9687	497.356	Anchored	656	18
2012-11-15	Attom	NDR2	ETH2A	22	-7.89203	272679	19224.2	24915	355450	1.96745e+06	8.30629	1.15745	0.0713307	0.856134	1.18405	1.43967	0.120391	1.15745	0.803968	965.987	17.4774	732.812	16.0153	793.199	15.7277	24.1386	7.61308	44.6591	249.191	Anchored	726	16
2012-11-15	Attom	NDR2	ETH2A	24	185.741	16666.8	1315.19	676.182	-0.527427	135659	9.00996	1.41788	0.0776133	2.61332	1.18772	2.97318	0.110988	1.41788	0.476889	1136.1	52.0008	678.485	18.2365	794.904	32.2616	40.2794	14.6456	84.1572	475.85	Anchored	666	18
2012-11-15	Attom	NDR2	ETH2A	25	-6.02371	1014.4	415.227	850.65	9.32107	5257.9	5.70535	4.0225	0.37023	6.29854	8.94727	7.47343	0.175274	4.0225	0.538241	3791.68	95.4183	1041.1	76.8831	2332.64	128.082	72.5424	55.3679	1163.45	2827.46	Anchored	662	80
2012-11-15	Attom	NDR2	ETH2A	26	35.7961	620.555	189.662	368.32	-0.527427	3962.05	7.3902	4.06086	0.305091	8.79073	5.69212	9.68337	0.135314	4.06086	0.419365	3495.57	135.917	818.112	62.1013	1930.17	154.833	76.5957	57.6146	957.228	2739.56	Anchored	580	70
2012-11-15	Attom	NDR2	ETH2A	27	70.5636	604.305	194.886	390.854	38.6393	3159.22	5.60066	4.12826	0.321229	9.05358	7.90818	9.95037	0.17855	4.12826	0.414885	3575.04	139.189	1059.05	80.1357	2220.61	165.189	70.3765	52.3082	996.373	2596.12	Anchored	738	96
2012-11-15	Attom	NDR2	ETH2A	30	106.832	3897.87	546.083	804.305	44.9272	30183.6	8.87606	1.83487	0.140402	4.21172	2.18099	4.59405	0.112663	1.83487	0.399402	2231.39	72.9015	688.192	23.9092	1174.99	62.0317	69.1586	41.43	424.768	1567.11	Anchored	623	24
2012-11-16	Attom	NDR2	ETH2A	31	128.241	13973.6	1350.78	1491.22	658.719	122966	9.87842	2.00123	0.0963082	2.44055	1.34424	3.15614	0.101231	2.00123	0.634075	1552.95	45.8202	621.617	23.6745	865.067	36.1033	59.9718	28.1423	207.347	955.005	Anchored	595	23
2012-11-16	Attom	NDR2	ETH2A	34	37.2673	1441.88	127.735	148.657	-0.841751	14978.9	11.9468	2.94763	0.0824848	7.19287	0.951971	7.77341	0.0837045	2.94763	0.379195	1256.17	140.656	518.196	29.2868	679.128	74.2087	58.748	23.6968	86.7232	767.262	Anchored	503	29
2012-11-16	Attom	NDR2	ETH2A	37	92.5843	2200.85	175.577	143.211	-0.841751	21660.9	10.9224	2.57141	0.0772934	6.26079	0.975719	6.76828	0.0915548	2.57141	0.379921	1127.87	124.731	564.726	27.7473	691.407	65.7068	49.9301	18.3223	60.9747	590.896	Anchored	552	28
2012-11-16	Attom	NDR2	ETH2A	38	55.2189	575.453	129.002	172.3	10.1646	5412.34	10.2349	4.28838	0.249152	10.2459	3.35646	11.1071	0.0977047	4.28838	0.386093	3178.67	162.287	600.944	49.0252	1494.3	160.417	81.0945	59.7842	732.936	2626.75	Anchored	463	53
2012-11-16	Attom	NDR2	ETH2A	39	88.3055	9397.95	978.71	998.858	999.174	80018.2	9.41992	2.44039	0.10257	3.31694	1.50132	4.11796	0.106158	2.44039	0.592622	1670.31	61.3337	650.397	30.1251	930.924	48.9922	61.0613	30.1343	231.535	1050.04	Anchored	618	29
2012-11-16	Attom	NDR2	ETH2A	42	76.4819	1899.08	151.643	120.761	5.92949	15416.4	9.16738	2.97806	0.0800276	8.14827	1.20364	8.67543	0.109082	2.97806	0.343275	1196.78	160.706	667.417	37.6534	802.264	91.9383	44.2323	16.8083	42.9086	567.017	Anchored	653	39
2014-06-05	Attom	NDR5	ETH2A	1	-55.2031	603.727	74.1781	79.8182	3.10817	5387.72	10.2609	5.38254	0.127277	8.00557	1.7095	9.64681	0.0974569	5.38254	0.557961	2060.71	141.221	599.488	61.3329	1012.1	116.638	70.9086	40.7678	295.973	1399.89	Anchored	551	59
2014-06-05	Attom	NDR5	ETH2A	2	189.2	1181790	90538.3	219448	2309687	8127896	8.1515	2.73353	0.0753509	0.550747	1.27396	2.78846	0.122677	2.73353	0.980301	1077.88	11.0541	745.952	38.396	834.162	31.2392	30.7943	10.5746	56.9705	293.529	Anchored	736	38
2014-06-05	Attom	NDR5	ETH2A	21	156.213	776793	57031.1	116207	3674688	6969348	10.5791	2.74409	0.0730245	0.628801	0.951319	2.81521	0.094526	2.74409	0.974736	1014.63	12.7415	582.249	30.4821	678.789	27.4964	42.6148	14.2224	69.0435	401.902	Anchored	573	30
Sample ETH06A - River Tekeze, (Gibai), Ethiopia (modern river sand)
2013-07-01	Attom	NDR4	ETH6A	2	-150.062	74.2375	33.0491	67.3432	3.34822	397.255	5.1801	17.188	0.557441	21.401	14.8309	27.4487	0.193046	17.188	0.626188	4400.14	312.715	1137.86	348.956	2804.45	421.334	74.1405	59.4267	1245.26	2913.33	7/6 > 0.5
2013-07-01	Attom	NDR4	ETH6A	7	104.312	93.6717	13.3105	-0.40246	1.22549	682.638	6.37157	14.097	0.128455	57.541	2.7785	59.2427	0.156947	14.097	0.237954	2076.14	1013.27	939.789	241.958	1349.78	636.26	54.7339	30.3744	-226.273	894.396	7/6 Imprecise
2013-07-01	Attom	NDR4	ETH6A	15	-167.927	380936	27269.2	61878.7	24417370	107937800	12.2848	26.0983	0.0677885	2.85834	0.760489	26.2544	0.0814012	26.0983	0.994056	861.16	59.3114	504.481	248.433	574.292	207.574	41.4184	12.156	-137.764	108.246	Not rutile - ?monazite?
2013-07-01	Attom	NDR4	ETH6A	21	-37.2024	132338	8050.93	49.2161	-0.850341	178745500	7.94182	15.1448	0.0584405	1.07926	1.01414	15.1832	0.125916	15.1448	0.99747	545.331	23.5834	764.523	214.749	710.965	144.468	-40.1942	-7.53312	-198.025	-433.941	Reverse discordance
2013-07-25	Nu Plasma HR	NDR4	ETH6A	33	-68.319	0.000138285	-0.000296337	n.d.	n.d.	0.000718735	109.772	230.53	1.05873	21.7241	1.32983	231.551	0.0091098	230.53	0.995589	5316.81	304.29	58.4597	262.882	858.806	1312.78	98.9005	93.1929	-512.435	4995.47	7/6 > 0.5
2013-07-25	Nu Plasma HR	NDR4	ETH6A	34	889.956	0.320912	0.158709	n.d.	n.d.	0.827774	3.56398	2.49813	0.577191	0.346506	22.3298	2.52204	0.280585	2.49813	0.990517	4450.95	5.04957	1594.31	70.1862	3198.18	47.8749	64.1805	50.1496	1556	2786.46	7/6 > 0.5
2013-07-25	Nu Plasma HR	NDR4	ETH6A	63	0	0	0	n.d.	n.d.	11.172	10.6002	2.16824	0.0591951	0.574372	0.769968	2.24303	0.0943379	2.16824	0.966658	573.299	12.4916	581.141	24.0536	579.745	19.6245	-1.3678	-0.240843	-21.0207	-31.8952	Weird duplicate
2013-07-25	Nu Plasma HR	NDR4	ETH6A	71	-54.0128	0.00230524	3.20973e-05	n.d.	n.d.	0.00436906	6.58165	85.5848	-0.0282403	460.336	-0.59161	468.224	0.151938	85.5848	0.182786			911.816	1312.28	-909.308			200.276	-1821.12	-2224.1	Failed
2013-07-01	Attom	NDR4	ETH6A	5	37.6225	12797	788.515	0.613003	9.09094	155220	10.634	2.49421	0.0599294	1.89673	0.776694	3.13347	0.0940381	2.49421	0.795989	600.054	41.0653	579.375	27.5819	583.596	27.4436	3.44613	0.723246	-23.2228	-6.90323	Conc within Unc	579.375	27.5819
2013-07-01	Attom	NDR4	ETH6A	9	-178.593	7833.16	479.472	34.2234	4.4643	111071	12.6066	2.8485	0.0589306	2.82674	0.644243	4.01303	0.0793237	2.8485	0.709813	563.552	61.5778	492.085	26.9344	504.93	31.4394	12.6816	2.5439	-18.5945	44.533	Conc within Unc	492.085	26.9344
2013-07-01	Attom	NDR4	ETH6A	10	-80.16	26232.4	1612.44	32.4082	3.53774	358552	12.113	2.55414	0.0596993	1.96691	0.679244	3.22371	0.0825563	2.55414	0.792296	591.719	42.6444	511.363	25.0638	526.317	26.1412	13.5802	2.8413	-11.1869	55.2928	Conc within Unc	511.363	25.0638
2013-07-01	Attom	NDR4	ETH6A	12	-52.4675	5306.9	329.048	47.2042	96.4288	57703.5	9.60469	2.90559	0.0626572	2.85975	0.89907	4.07684	0.104116	2.90559	0.712706	695.657	60.9417	638.484	35.2288	651.23	38.4579	8.21853	1.95725	-25.7118	21.944	Conc within Unc	638.484	35.2288
2013-07-01	Attom	NDR4	ETH6A	13	-227.7	14793.9	897.769	-13.8538	4.23729	207546	12.127	2.69221	0.0577374	1.75343	0.656163	3.21287	0.0824609	2.69221	0.837946	518.825	38.4882	510.795	26.3879	512.264	25.5265	1.54775	0.286781	-24.0574	-18.3577	Conc within Unc	510.795	26.3879
2013-07-01	Attom	NDR4	ETH6A	14	-168.783	14301.2	939.174	51.6853	2.27273	150819	9.2959	2.77855	0.0626666	1.72932	0.929074	3.27275	0.107574	2.77855	0.848996	695.976	36.8501	658.645	34.7003	667.147	31.515	5.36388	1.27444	-23.0126	2.63105	Conc within Unc	658.645	34.7003
2013-07-01	Attom	NDR4	ETH6A	16	-262.249	28001.2	1735.23	37.1405	-0.850341	317424	10.249	2.52105	0.0608085	1.59295	0.817687	2.98214	0.09757	2.52105	0.845382	631.5	34.3077	600.153	28.8298	606.757	26.884	4.96397	1.08849	-20.2796	2.51761	Conc within Unc	600.153	28.8298
2013-07-01	Attom	NDR4	ETH6A	19	-14.0782	27418.8	1673.6	65.7121	-0.850341	349846	11.1899	2.64305	0.060649	1.48399	0.74697	3.03117	0.0893663	2.64305	0.871959	625.838	31.9912	551.789	27.8942	566.465	25.9848	11.832	2.59087	-11.3084	46.1548	Conc within Unc	551.789	27.8942
2013-07-01	Attom	NDR4	ETH6A	20	-290.324	38917.8	2409.41	52.9965	-0.850341	446469	10.4954	2.49483	0.0611766	1.94534	0.803328	3.16363	0.0952799	2.49483	0.788599	644.484	41.8069	586.688	27.9206	598.704	28.2237	8.96776	2.00705	-16.2074	29.8751	Conc within Unc	586.688	27.9206
2013-07-01	Attom	NDR4	ETH6A	23	-111.046	12599.9	828.352	65.0424	-0.850341	129000	9.04305	2.6115	0.0636063	2.01384	0.969373	3.2978	0.110582	2.6115	0.791892	727.612	42.6916	676.128	33.4384	688.141	32.4408	7.07581	1.74572	-20.4278	18.046	Conc within Unc	676.128	33.4384
2013-07-01	Attom	NDR4	ETH6A	24	-4.65834	23107.6	1423.46	53.1061	-0.850341	264893	10.1633	2.48944	0.0602801	1.6735	0.817423	2.99965	0.0983936	2.48944	0.82991	612.671	36.1558	604.988	28.6875	606.61	27.035	1.25397	0.267281	-25.4137	-21.0048	Conc within Unc	604.988	28.6875
2013-07-01	Attom	NDR4	ETH6A	28	0.298728	67156.2	4341.63	100.212	371.733	752098	9.83737	2.47001	0.0622647	1.36936	0.872305	2.82419	0.101653	2.47001	0.874588	682.251	29.2455	624.09	29.318	636.818	26.3751	8.52486	1.99875	-13.6467	28.8429	Conc within Unc	624.09	29.318
2013-07-25	Nu Plasma HR	NDR4	ETH6A	32	31.1458	0.300012	0.0157246	n.d.	n.d.	2.43878	11.0889	2.18344	0.0601251	2.16216	0.747597	3.07284	0.0901801	2.18344	0.710561	607.107	46.7568	556.602	23.2444	566.829	26.3499	8.31889	1.80428	-16.1227	27.2601	Conc within Unc	556.602	23.2444
2013-07-25	Nu Plasma HR	NDR4	ETH6A	35	45.6313	0.310288	0.0166127	n.d.	n.d.	2.23801	9.88079	2.23076	0.0617804	1.61864	0.862106	2.75614	0.101206	2.23076	0.809381	665.553	34.6646	621.476	26.3786	631.272	25.5878	6.62274	1.55182	-15.7916	17.6992	Conc within Unc	621.476	26.3786
2013-07-25	Nu Plasma HR	NDR4	ETH6A	37	-487.219	0.443231	0.0224333	n.d.	n.d.	3.48412	10.6334	2.24064	0.0581106	1.2046	0.753499	2.54392	0.0940429	2.24064	0.880782	532.949	26.3777	579.403	24.7843	570.253	21.9602	-8.71646	-1.60469	-31.1109	-71.2386	Conc within Unc	579.403	24.7843
2013-07-25	Nu Plasma HR	NDR4	ETH6A	39	-90.6177	0.334744	0.0171302	n.d.	n.d.	2.62908	10.5392	2.25095	0.0591153	2.36825	0.773383	3.26732	0.0948841	2.25095	0.688927	570.366	51.5309	584.358	25.1011	581.702	28.5317	-2.45311	-0.45661	-31.1878	-39.0928	Conc within Unc	584.358	25.1011
2013-07-25	Nu Plasma HR	NDR4	ETH6A	40	29.4753	0.434471	0.0227898	n.d.	n.d.	3.13049	9.72363	2.21541	0.0594867	1.24398	0.843515	2.54077	0.102842	2.21541	0.871944	583.978	27.0057	631.044	26.5806	621.083	23.3384	-8.05944	-1.60375	-33.299	-73.646	Conc within Unc	631.044	26.5806
2013-07-25	Nu Plasma HR	NDR4	ETH6A	42	-51.7644	1.56695	0.0780932	n.d.	n.d.	13.9691	11.821	2.14679	0.0581019	0.722868	0.677698	2.26522	0.0845951	2.14679	0.947716	532.621	15.8299	523.492	21.552	525.382	18.4141	1.71392	0.359803	-16.5237	-12.4233	Conc within Unc	523.492	21.552
2013-07-25	Nu Plasma HR	NDR4	ETH6A	43	-70.2412	0.713219	0.0366286	n.d.	n.d.	5.27769	9.95755	2.55701	0.0599574	0.66714	0.830217	2.64261	0.100426	2.55701	0.967609	601.066	14.4416	616.906	30.0162	613.733	24.0562	-2.63546	-0.517133	-27.23	-45.8571	Conc within Unc	616.906	30.0162
2013-07-25	Nu Plasma HR	NDR4	ETH6A	46	-199.293	0.414389	0.0237278	n.d.	n.d.	2.58206	8.23932	2.35105	0.0656892	1.52232	1.09927	2.80087	0.121369	2.35105	0.839399	795.546	31.9197	738.44	32.7241	752.997	29.356	7.17827	1.93328	-14.7984	24.3824	Conc within Unc	738.44	32.7241
2013-07-25	Nu Plasma HR	NDR4	ETH6A	47	2.58804	0.428912	0.0227794	n.d.	n.d.	3.07662	9.50609	2.12649	0.0611693	1.35689	0.887224	2.52252	0.105196	2.12649	0.843002	644.227	29.1618	644.786	26.0431	644.877	23.8015	-0.0867199	0.0140493	-23.7109	-26.6018	Conc within Unc	644.786	26.0431
2013-07-25	Nu Plasma HR	NDR4	ETH6A	50	43.3617	0.564407	0.0297353	n.d.	n.d.	4.3855	10.3587	2.16094	0.0617081	0.810266	0.821368	2.30786	0.0965371	2.16094	0.936342	663.044	17.3598	594.083	24.4815	608.811	20.9184	10.4007	2.41918	-6.19012	44.4797	Conc within Unc	594.083	24.4815
2013-07-25	Nu Plasma HR	NDR4	ETH6A	51	-48.5226	1.34712	0.069726	n.d.	n.d.	10.4022	10.2971	2.09942	0.0603643	0.745474	0.80829	2.22785	0.097115	2.09942	0.942355	615.686	16.0978	597.479	23.9153	601.495	20.0242	2.95721	0.667546	-16.009	-5.70817	Conc within Unc	597.479	23.9153
2013-07-25	Nu Plasma HR	NDR4	ETH6A	53	54.75	0.429953	0.0222602	n.d.	n.d.	3.45238	10.7514	2.14849	0.0598241	1.11995	0.767209	2.42287	0.0930114	2.14849	0.886754	596.246	24.2631	573.322	23.5288	578.161	21.1391	3.84464	0.836878	-16.3006	-0.605266	Conc within Unc	573.322	23.5288
2013-07-25	Nu Plasma HR	NDR4	ETH6A	55	121.872	1.55465	0.0776751	n.d.	n.d.	14.4129	12.353	2.14608	0.0580827	0.482071	0.648299	2.19956	0.080952	2.14608	0.975687	531.898	10.558	501.802	20.688	507.431	17.4182	5.65809	1.10933	-11.7892	9.40728	Conc within Unc	501.802	20.688
2013-07-25	Nu Plasma HR	NDR4	ETH6A	56	104.252	1.70132	0.0844483	n.d.	n.d.	15.0057	11.7217	2.22408	0.057566	0.607998	0.677139	2.30569	0.0853121	2.22408	0.964606	512.293	13.3606	527.752	22.5007	525.044	18.7308	-3.01772	-0.515929	-21.4397	-37.9603	Conc within Unc	527.752	22.5007
2013-07-25	Nu Plasma HR	NDR4	ETH6A	57	19.8785	1.9911	0.0995657	n.d.	n.d.	18.5662	12.1328	2.25582	0.0581221	0.498949	0.660515	2.31034	0.0824214	2.25582	0.976401	533.384	10.9249	510.56	22.1081	514.929	18.4933	4.27919	0.848551	-14.1239	0.716441	Conc within Unc	510.56	22.1081
2013-07-25	Nu Plasma HR	NDR4	ETH6A	58	56.655	0.0924101	0.00421394	n.d.	n.d.	0.767107	11.1963	3.26059	0.0536796	3.72581	0.66105	4.95107	0.0893149	3.26059	0.658563	356.618	84.1206	551.484	34.3761	515.256	39.2456	-54.6428	-7.03097	-75.4731	-229.242	Conc within Unc	551.484	34.3761
2013-07-25	Nu Plasma HR	NDR4	ETH6A	59	-0.114961	0.69982	0.0350742	n.d.	n.d.	6.0621	11.4371	2.23897	0.0585285	0.785942	0.705589	2.37291	0.0874346	2.23897	0.943555	548.619	17.1644	540.347	23.1684	542.124	19.7419	1.50776	0.327713	-17.9653	-14.8965	Conc within Unc	540.347	23.1684
2013-07-25	Nu Plasma HR	NDR4	ETH6A	60	72.4957	0.197843	0.0101218	n.d.	n.d.	1.88211	12.4008	2.49288	0.059248	3.37564	0.658755	4.19636	0.0806397	2.49288	0.594058	575.243	73.3902	499.94	23.9393	513.852	33.2916	13.0907	2.70744	-19.3794	51.3641	Conc within Unc	499.94	23.9393
2013-07-25	Nu Plasma HR	NDR4	ETH6A	61	48.6498	2.99391	0.148998	n.d.	n.d.	26.9201	11.8239	2.16449	0.0579782	0.32771	0.676093	2.18916	0.0845748	2.16449	0.988732	527.952	7.18211	523.371	21.7247	524.41	17.7762	0.867539	0.19814	-16.7371	-17.1445	Conc within Unc	523.371	21.7247
2013-07-25	Nu Plasma HR	NDR4	ETH6A	62	-196.164	1.39301	0.0706337	n.d.	n.d.	11.172	10.6002	2.16824	0.0591951	0.574372	0.769968	2.24303	0.0943379	2.16824	0.966658	573.299	12.4916	581.141	24.0536	579.745	19.6245	-1.3678	-0.240843	-21.0207	-31.8952	Conc within Unc	581.141	24.0536
2013-07-25	Nu Plasma HR	NDR4	ETH6A	65	-159.261	2.10942	0.105072	n.d.	n.d.	18.5535	11.5663	2.16203	0.0584919	0.461603	0.697272	2.21076	0.086458	2.16203	0.977959	547.253	10.0834	534.555	22.144	537.16	18.2784	2.32023	0.484942	-15.6734	-9.44649	Conc within Unc	534.555	22.144
2013-07-25	Nu Plasma HR	NDR4	ETH6A	66	-23.8816	1.44493	0.0738953	n.d.	n.d.	12.3921	11.0809	2.46477	0.0597456	0.619293	0.743418	2.54138	0.0902456	2.46477	0.969855	593.397	13.4231	556.989	26.2507	564.398	21.7719	6.13552	1.31266	-14.3633	10.1573	Conc within Unc	556.989	26.2507
2013-07-25	Nu Plasma HR	NDR4	ETH6A	72	-88.2012	1.25075	0.0645039	n.d.	n.d.	9.44253	9.64384	2.15066	0.0600885	0.366127	0.859098	2.18161	0.103693	2.15066	0.985817	605.79	7.91926	636.016	25.9984	629.63	20.2691	-4.98956	-1.0142	-26.6548	-56.2246	Conc within Unc	636.016	25.9984
2013-07-25	Nu Plasma HR	NDR4	ETH6A	73	-101.709	0.764622	0.0379273	n.d.	n.d.	6.76522	11.3855	2.15295	0.0580611	0.826716	0.703129	2.30622	0.0878311	2.15295	0.93354	531.082	18.1087	542.697	22.3725	540.658	19.1534	-2.18713	-0.377221	-21.1928	-33.988	Conc within Unc	542.697	22.3725
2013-07-25	Nu Plasma HR	NDR4	ETH6A	74	-220.878	0.296164	0.0139769	n.d.	n.d.	2.7056	11.8315	2.24395	0.055478	0.973358	0.646519	2.44597	0.0845198	2.24395	0.91741	430.538	21.6931	523.045	22.5074	506.334	19.3191	-21.4865	-3.30034	-36.0298	-115.015	Conc within Unc	523.045	22.5074
2013-07-25	Nu Plasma HR	NDR4	ETH6A	75	-304.876	1.4087	0.0710713	n.d.	n.d.	12.6877	11.5493	2.16157	0.0587576	0.510572	0.701469	2.22106	0.0865852	2.16157	0.973219	557.145	11.1344	535.31	22.1693	539.668	18.4271	3.91918	0.807645	-14.0685	-0.333746	Conc within Unc	535.31	22.1693
2013-07-01	Attom	NDR4	ETH6A	1	-99.0232	6755.32	500.86	242.66	38.1356	81836	10.7515	2.75614	0.0726146	1.9533	0.930811	3.37812	0.0930104	2.75614	0.81588	1002.3	39.6545	573.317	30.1676	668.061	32.5446	42.8002	14.1821	62.2002	398.82	Anchored	564	30
2013-07-01	Attom	NDR4	ETH6A	3	-4.69844	15784.1	1061.31	150.33	163.542	194844	11.1845	2.78057	0.0665147	2.55706	0.819607	3.77758	0.0894091	2.78057	0.736071	821.677	53.3927	552.041	29.3551	607.829	33.9793	32.8153	9.17817	21.8083	240.281	Anchored	547	29
2013-07-01	Attom	NDR4	ETH6A	4	-29.9903	18539.8	1984	2214.25	279.607	250214	11.8873	2.54589	0.102594	2.07974	1.18945	3.28739	0.0841237	2.54589	0.774443	1670.74	38.4545	520.69	25.4198	795.706	35.6352	68.8349	34.5625	239.381	1124.64	Anchored	493	24
2013-07-01	Attom	NDR4	ETH6A	6	-286.542	4396.15	294.418	48.6465	1.13637	54761.4	10.8849	2.90202	0.0655033	3.48113	0.829362	4.53211	0.0918703	2.90202	0.640324	789.599	73.0614	566.589	31.4047	613.258	40.8912	28.2435	7.61005	5.77803	191.606	Anchored	562	31
2013-07-01	Attom	NDR4	ETH6A	8	136.948	5511.59	484.197	349.13	14.151	57480.7	9.15537	3.07963	0.084414	2.40389	1.2707	3.90676	0.109226	3.07963	0.788281	1301.24	46.7083	668.249	38.9796	832.706	43.4545	48.6451	19.7497	121.002	594.009	Anchored	650	38
2013-07-01	Attom	NDR4	ETH6A	11	142.487	6398.87	965.355	1463.22	788.207	65531.7	8.93454	2.9421	0.147428	2.25682	2.27413	3.70799	0.111925	2.9421	0.793449	2315.54	38.7142	683.919	38.0693	1204.3	50.9995	70.464	43.2101	469.379	1593.55	Anchored	613	35
2013-07-01	Attom	NDR4	ETH6A	17	46.6339	28875.7	1904.21	273.584	-0.850341	376217	11.6051	2.50199	0.0619472	1.45139	0.735662	2.89248	0.086169	2.50199	0.864996	671.323	31.0533	532.84	25.5403	559.871	24.5965	20.6283	4.82804	2.4343	112.942	Anchored	530	25
2013-07-01	Attom	NDR4	ETH6A	18	-203.856	1584.09	151.515	61.913	15.6591	12516.3	7.15415	3.40438	0.093824	4.33744	1.80743	5.51391	0.139779	3.40438	0.617416	1503.72	81.967	843.413	53.6044	1048.15	69.6455	43.9117	19.5332	135.091	606.707	Anchored	816	53
2013-07-01	Attom	NDR4	ETH6A	22	-210.388	18348.2	1176.35	31.5601	-0.850341	213731	10.6688	2.58729	0.0641673	2.11242	0.828906	3.34011	0.0937315	2.58729	0.77461	746.2	44.6464	577.568	28.5237	613.005	30.286	22.5988	5.78089	5.15113	140.108	Anchored	574	28
2013-07-01	Attom	NDR4	ETH6A	25	-29.1891	6289.31	1077.08	1703.17	567.804	66765.4	9.48571	3.13391	0.15933	5.17258	2.31491	6.04788	0.105422	3.13391	0.518182	2447.8	87.5273	646.104	38.4186	1216.86	82.3376	73.6047	46.9042	488.423	1763.28	Anchored	569	37
2013-07-01	Attom	NDR4	ETH6A	27	30.464	8687	654.829	244.841	-1.19048	113528	11.6737	2.71627	0.0707098	2.5606	0.834788	3.73294	0.0856624	2.71627	0.72765	948.116	52.4172	529.833	27.5732	616.265	33.9177	44.1173	14.0252	52.5145	390.709	Anchored	522	27
2013-07-25	Nu Plasma HR	NDR4	ETH6A	31	212.072	0.178027	0.0158769	n.d.	n.d.	1.32708	10.3099	2.29916	0.102712	1.75247	1.37363	2.8909	0.0969946	2.29916	0.79531	1672.87	32.3945	596.772	26.1565	877.718	33.4182	64.3264	32.0087	247.528	1049.94	Anchored	566	25
2013-07-25	Nu Plasma HR	NDR4	ETH6A	36	7.16124	0.160578	0.011113	n.d.	n.d.	1.26119	10.7825	2.78692	0.0793228	4.66449	1.01433	5.43363	0.0927428	2.78692	0.512901	1179.31	92.2303	571.738	30.4235	711.059	54.0976	51.5194	19.5935	85.2237	577.15	Anchored	558	30
2013-07-25	Nu Plasma HR	NDR4	ETH6A	38	10.0386	0.237363	0.0263087	n.d.	n.d.	1.66141	9.31952	2.67122	0.131943	2.57687	1.95206	3.71156	0.107302	2.67122	0.719703	2123.2	45.1375	657.058	33.2871	1099.16	48.6561	69.0534	40.2216	393.443	1432.85	Anchored	601	31
2013-07-25	Nu Plasma HR	NDR4	ETH6A	41	-38.0816	2.22211	0.12041	n.d.	n.d.	16.9399	10.1179	2.10222	0.0635202	1.41687	0.865613	2.53512	0.0988349	2.10222	0.829237	724.74	30.0505	607.578	24.3323	633.182	23.6103	16.1661	4.04382	1.99444	92.8302	Anchored	605	24
2013-07-25	Nu Plasma HR	NDR4	ETH6A	44	-198.746	0.087459	0.00917783	n.d.	n.d.	0.589837	8.86033	2.91923	0.122747	4.80662	1.91013	5.62366	0.112863	2.91923	0.519098	1995.74	85.4264	689.352	38.0577	1084.63	72.3221	65.4589	36.4437	322.957	1268.33	Anchored	639	37
2013-07-25	Nu Plasma HR	NDR4	ETH6A	45	135.449	0.0814322	0.024104	n.d.	n.d.	0.36304	5.6963	4.20823	0.343023	3.49831	8.30292	5.47242	0.175552	4.20823	0.768989	3675.6	53.4096	1042.63	80.5189	2264.64	94.6358	71.6337	53.9603	1127.37	2552.45	Anchored	698	65
2013-07-25	Nu Plasma HR	NDR4	ETH6A	48	25.2102	0.0659607	0.00487935	n.d.	n.d.	0.506075	10.2263	2.78841	0.0856611	3.2687	1.15496	4.29647	0.0977869	2.78841	0.649002	1329.68	63.2585	601.426	31.9442	779.581	45.7177	54.769	22.8526	132.437	696.305	Anchored	583	31
2013-07-25	Nu Plasma HR	NDR4	ETH6A	49	253.948	0.102169	0.00616457	n.d.	n.d.	0.925821	11.847	3.0111	0.0715443	2.79547	0.832657	4.1087	0.0844092	3.0111	0.73286	972.088	57.0143	522.387	30.1477	615.085	37.219	46.2613	15.0707	55.4788	419.552	Anchored	514	30
2013-07-25	Nu Plasma HR	NDR4	ETH6A	52	61.9632	0.0277842	0.00186424	n.d.	n.d.	0.26377	12.3609	4.10486	0.0765162	10.8474	0.8535	11.5981	0.0809	4.10486	0.353926	1107.71	216.753	501.493	39.4892	626.568	103.046	54.7271	19.962	22.0291	566.729	Anchored	490	40
2013-07-25	Nu Plasma HR	NDR4	ETH6A	54	436.699	0.0547815	0.0122112	n.d.	n.d.	0.316126	7.50039	4.78795	0.262063	2.13689	4.81751	5.24317	0.133326	4.78795	0.913179	3258.44	33.6337	806.814	72.2145	1787.96	84.5534	75.2393	54.8752	896.593	2379.41	Anchored	614	58
2013-07-25	Nu Plasma HR	NDR4	ETH6A	64	-151.539	0.293699	0.0165113	n.d.	n.d.	2.09372	9.37242	2.29454	0.0652729	1.42479	0.960246	2.70092	0.106696	2.29454	0.849543	782.201	29.9387	653.531	28.4581	683.424	26.5191	16.4497	4.37397	3.37366	100.212	Anchored	651	29
2013-07-25	Nu Plasma HR	NDR4	ETH6A	67	-80.9471	0.0371043	0.00313958	n.d.	n.d.	0.297466	9.93352	4.62669	0.0992259	9.47333	1.37728	10.5428	0.100669	4.62669	0.438849	1608.78	176.564	618.33	54.3284	879.279	117.028	61.5652	29.6777	143.921	936.118	Anchored	589	54
2013-07-25	Nu Plasma HR	NDR4	ETH6A	68	-33.9111	0.214275	0.0171806	n.d.	n.d.	1.46617	8.81718	3.04227	0.093531	4.38357	1.4626	5.33583	0.113415	3.04227	0.570158	1497.81	82.9043	692.55	39.8306	915.083	62.3996	53.7625	24.3184	160.134	765.431	Anchored	667	39
2013-07-25	Nu Plasma HR	NDR4	ETH6A	69	5.09418	0.274498	0.0174819	n.d.	n.d.	2.41301	11.2907	2.54924	0.0758154	1.58279	0.925844	3.00064	0.0885685	2.54924	0.849564	1089.3	31.7142	547.065	26.6859	665.446	28.8802	49.7782	17.7897	89.5004	515.548	Anchored	536	26
2013-07-25	Nu Plasma HR	NDR4	ETH6A	70	-213.704	0.128499	0.0167793	n.d.	n.d.	0.656825	6.55096	4.94286	0.152102	4.3392	3.20133	6.57727	0.152649	4.94286	0.751506	2368.92	74.0215	915.798	83.8488	1457.48	96.9933	61.3412	37.1658	444.691	1369.28	Anchored	824	79
Sample ETH08A - River Tekeze, Malemin Bridge, Ethiopia (modern river sand)
2013-07-26	Nu Plasma HR	NDR4	ETH8A	17	-64.5134	0.0614956	0.00148899	n.d.	n.d.	0.397142	9.81566	2.5493	0.0258553	13.9236	0.363189	14.1551	0.101878	2.5493	0.180098			625.406	30.3175	314.593	73.835		-98.7985	-384.648	-595.088	Failed
2013-07-26	Nu Plasma HR	NDR4	ETH8A	20	-108.353	0.00366929	-0.0013267	n.d.	n.d.	0.0185769	24.5332	134.941	-0.42288	18.445	-2.37664	136.196	0.040761	134.941	0.990787			257.549	647.718					-257.549	390.169	Failed
2013-07-26	Nu Plasma HR	NDR4	ETH8A	21	-214.15	0.0155919	-0.00115801	n.d.	n.d.	0.102969	10.0625	8.88198	-0.0937938	18.1249	-1.28519	20.1842	0.0993785	8.88198	0.440047			610.766	102.693					-610.766	-508.073	Failed
2013-07-26	Nu Plasma HR	NDR4	ETH8A	25	68.6786	0.0185795	-0.000472312	n.d.	n.d.	0.147433	12.153	6.49516	-0.0354428	42.3218	-0.402109	42.8173	0.0822839	6.49516	0.151695			509.741	63.3543	-522.259	-871.057		197.603	-160.943	-446.387	Failed
2013-07-26	Nu Plasma HR	NDR4	ETH8A	26	40.02	0.00461804	-0.00141674	n.d.	n.d.	0.0441659	13.9241	19.5514	-0.386653	21.7249	-3.82873	29.2272	0.0718177	19.5514	0.668946			447.098	166.728					-447.098	-280.37	Failed
2013-07-26	Nu Plasma HR	NDR4	ETH8A	33	-192.052	0.012606	0.00163858	n.d.	n.d.	0.076199	8.83904	11.5882	0.147342	12.8951	2.29839	17.337	0.113134	11.5882	0.668411	2314.54	221.23	690.926	150.089	1211.79	219.743	70.1484	42.9832	301.124	1773.7	Huge uncertainty
2013-07-26	Nu Plasma HR	NDR4	ETH8A	36	-148.467	0.00324035	0.00293239	n.d.	n.d.	-0.00502787	-6.96527	69.6688	0.742074	21.5612	-14.6896	72.9289	-0.143569	69.6688	0.955297	4813.78	308.608	-999.079	-1714.92			120.755		999.079	4097.94	Failed
2013-07-26	Nu Plasma HR	NDR4	ETH8A	39	-199.578	0.0393561	0.00356943	n.d.	n.d.	0.286644	10.4711	4.35051	0.106391	8.55335	1.40092	9.59618	0.0955008	4.35051	0.453358	1737.65	156.821	587.988	48.7125	889.326	107.781	66.162	33.8839	193.557	1198.38	Huge uncertainty
2013-07-26	Nu Plasma HR	NDR4	ETH8A	40	-122.203	0.00100324	-5.66479e-05	n.d.	n.d.	0.000574679	119.3	93.0662	0.72484	165.554	0.837727	189.919	0.00838222	93.0662	0.49003	4780.12	2373.33	53.8101	98.9773	617.891	1020.31	98.8743	91.2913	-456.225	4825.29	Huge uncertainty
2013-07-26	Nu Plasma HR	NDR4	ETH8A	43	-152.773	0.00427712	0.000753362	n.d.	n.d.	0.0518885	25.25	25.2945	-0.0621118	354.2	-0.339167	355.102	0.039604	25.2945	0.0712316			250.378	123.053	-420.627			159.525	-671.005	-127.324	Failed
2013-07-26	Nu Plasma HR	NDR4	ETH8A	49	-348.047	0.0190937	0.00075336	n.d.	n.d.	0.155223	11.2969	6.72172	0.0447928	18.3065	0.546701	19.5015	0.0885197	6.72172	0.344677	-68.0073	447.043	546.777	70.0921	442.833	131.137	903.997	-23.4724	-235.081	-544.692	Huge uncertainty
2013-07-25	Nu Plasma HR	NDR4	ETH8A	9	155.54	-9.85906e-05	-0.000125256	n.d.	n.d.	0.0070308	-983.073	442.387	1.34069	74.5886	-0.188037	448.631	-0.00101722	442.387	0.986082	5645.46	1031.97	-6.56075	-58.3406	-211.505		100.116	96.8981	-204.944	5710.36	Failed
2013-07-25	Nu Plasma HR	NDR4	ETH8A	10	-33.6029	-1.11625e-05	0.000219908	n.d.	n.d.	-0.00217496	-241.814	152.356	-0.0117122	2134.53	0.00667819	2139.96	-0.00413542	152.356	0.0711956			-26.7139	-82.0896	6.75838	253.766		495.271	-220.294	108.803	Failed
2013-07-25	Nu Plasma HR	NDR4	ETH8A	13	-11.03	0.00409449	0.00196687	n.d.	n.d.	0.00947208	11.6478	45.4705	0.57626	5.03245	6.82144	45.7481	0.0858531	45.4705	0.993931	4448.6	73.3461	530.965	447.608	2088.51	595.689	88.0644	74.5769	961.856	3470.03	7/6 > 0.5
2013-07-25	Nu Plasma HR	NDR4	ETH8A	1	35.6638	0.337344	0.0175507	n.d.	n.d.	2.81013	10.5244	2.23599	0.0605133	0.826264	0.792784	2.38377	0.0950173	2.23599	0.938005	621.01	17.8266	585.142	24.9665	592.75	21.1842	5.77569	1.28351	-13.5762	10.9011	Conc within Unc	585.142	24.9665
2013-07-25	Nu Plasma HR	NDR4	ETH8A	2	241.576	1.04936	0.0537343	n.d.	n.d.	8.19935	9.90649	2.12007	0.0600216	0.366534	0.83539	2.15153	0.100944	2.12007	0.985382	603.382	7.93128	619.938	25.0133	616.598	19.6947	-2.74393	-0.541635	-23.0344	-41.5697	Conc within Unc	619.938	25.0133
2013-07-25	Nu Plasma HR	NDR4	ETH8A	3	6.79897	0.102358	0.00514909	n.d.	n.d.	0.813369	10.2108	2.5191	0.058142	2.57989	0.785114	3.60578	0.0979358	2.5191	0.698626	534.132	56.4816	602.301	28.9057	588.397	31.7051	-12.7624	-2.36305	-45.6091	-97.074	Conc within Unc	602.301	28.9057
2013-07-25	Nu Plasma HR	NDR4	ETH8A	4	260.917	0.16939	0.00899195	n.d.	n.d.	1.52101	11.1385	2.24724	0.0604932	1.47124	0.748829	2.68601	0.0897791	2.24724	0.836647	620.291	31.7457	554.23	23.8249	567.545	23.0916	10.6499	2.34596	-9.77724	42.2352	Conc within Unc	554.23	23.8249
2013-07-25	Nu Plasma HR	NDR4	ETH8A	6	41.1655	0.138987	0.0068096	n.d.	n.d.	1.24906	11.3227	2.48327	0.0575255	2.08603	0.700504	3.24317	0.0883179	2.48327	0.765693	510.749	45.8521	545.581	25.9294	539.092	26.7747	-6.81983	-1.20375	-33.264	-60.7616	Conc within Unc	545.581	25.9294
2013-07-25	Nu Plasma HR	NDR4	ETH8A	7	310.574	0.0287022	0.00145107	n.d.	n.d.	0.238669	10.3687	4.41866	0.0586392	7.67405	0.779765	8.85526	0.0964438	4.41866	0.498987	552.744	167.478	593.535	49.9165	585.349	75.881	-7.37968	-1.39839	-84.0665	-90.7072	Conc within Unc	593.535	49.9165
2013-07-25	Nu Plasma HR	NDR4	ETH8A	11	106.547	0.0244177	0.00153552	n.d.	n.d.	0.170151	8.76254	6.45161	0.0712838	7.71563	1.12166	10.0575	0.114122	6.45161	0.641469	964.646	157.542	696.643	84.6445	763.771	102.614	27.7825	8.78902	-35.4864	183.358	Conc within Unc	696.643	84.6445
2013-07-25	Nu Plasma HR	NDR4	ETH8A	12	26.1437	0.116423	0.00665636	n.d.	n.d.	0.787648	8.54321	2.63049	0.0647407	2.00801	1.04486	3.30931	0.117052	2.63049	0.794874	764.974	42.3111	713.573	35.4401	726.333	33.7715	6.71925	1.75668	-21.0121	15.9604	Conc within Unc	713.573	35.4401
2013-07-25	Nu Plasma HR	NDR4	ETH8A	14	192.676	0.0381884	0.00198724	n.d.	n.d.	0.288054	9.57768	3.90348	0.0598678	4.50994	0.861855	5.96462	0.104409	3.90348	0.654439	597.826	97.6795	640.198	47.4037	631.135	54.5767	-7.08778	-1.436	-63.6398	-89.7763	Conc within Unc	640.198	47.4037
2013-07-26	Nu Plasma HR	NDR4	ETH8A	16	212.146	0.276531	0.0125565	n.d.	n.d.	2.34944	13.2035	1.70884	0.0536118	1.772	0.559853	2.46173	0.0757377	1.70884	0.694163	353.764	40.028	470.631	15.4929	451.431	17.7861	-33.0352	-4.2532	-36.9864	-101.374	Conc within Unc	470.631	15.4929
2013-07-26	Nu Plasma HR	NDR4	ETH8A	18	24.2594	0.112417	0.00540766	n.d.	n.d.	0.711956	9.80613	2.62757	0.0572467	3.31897	0.804922	4.23317	0.101977	2.62757	0.620711	500.058	73.0864	625.985	31.2737	599.602	37.6312	-25.1824	-4.40013	-64.0145	-94.6529	Conc within Unc	625.985	31.2737
2013-07-26	Nu Plasma HR	NDR4	ETH8A	19	-91.4098	0.596285	0.0298406	n.d.	n.d.	4.24889	10.961	1.59326	0.0574162	0.731501	0.722244	1.75316	0.0912322	1.59326	0.908793	506.567	16.0903	562.82	17.1509	551.991	14.8216	-11.1048	-1.9619	-25.6511	-39.1023	Conc within Unc	562.82	17.1509
2013-07-26	Nu Plasma HR	NDR4	ETH8A	22	16.3994	0.747866	0.0347258	n.d.	n.d.	5.1429	10.5307	1.77433	0.054952	0.582326	0.719493	1.86745	0.0949602	1.77433	0.950138	409.265	13.0265	584.806	19.8089	550.368	15.7457	-42.8917	-6.25735	-50.1842	-155.732	Conc within Unc	584.806	19.8089
2013-07-26	Nu Plasma HR	NDR4	ETH8A	23	126.714	0.329235	0.0142828	n.d.	n.d.	2.50757	11.7745	1.8098	0.051447	1.866	0.602448	2.59948	0.0849294	1.8098	0.696214	259.876	42.8646	525.479	18.2398	478.786	19.655	-102.204	-9.75237	-66.3479	-247.363	Conc within Unc	525.479	18.2398
2013-07-26	Nu Plasma HR	NDR4	ETH8A	27	20.8981	0.188641	0.0101023	n.d.	n.d.	1.30051	10.402	1.95144	0.0616271	1.78493	0.816874	2.64463	0.0961352	1.95144	0.737886	660.23	38.2596	591.72	22.0282	606.303	23.8639	10.3767	2.40532	-9.28042	90.5381	Conc within Unc	591.72	22.0282
2013-07-26	Nu Plasma HR	NDR4	ETH8A	28	-200.97	0.236755	0.0114422	n.d.	n.d.	1.49034	9.52327	2.00688	0.0549208	2.18496	0.795156	2.96676	0.105006	2.00688	0.676457	407.994	48.888	643.679	24.541	594.092	26.3419	-57.7668	-8.34669	-75.9289	-211.144	Conc within Unc	643.679	24.541
2013-07-26	Nu Plasma HR	NDR4	ETH8A	30	207.634	0.422285	0.0206837	n.d.	n.d.	2.64384	9.63953	1.71852	0.0578715	1.08862	0.82777	2.03431	0.103739	1.71852	0.84477	523.913	23.8747	636.286	20.7912	612.374	18.5393	-21.4488	-3.90483	-42.4515	-91.582	Conc within Unc	636.286	20.7912
2013-07-26	Nu Plasma HR	NDR4	ETH8A	31	-54.172	0.262405	0.0132883	n.d.	n.d.	1.68874	9.89317	1.85318	0.0597806	1.15422	0.833155	2.18323	0.10108	1.85318	0.848824	594.666	25.0122	620.734	21.8965	615.361	19.9532	-4.38363	-0.873131	-25.3261	-4.17147	Conc within Unc	620.734	21.8965
2013-07-26	Nu Plasma HR	NDR4	ETH8A	32	-259.161	1.35908	0.0697333	n.d.	n.d.	9.08078	10.1587	1.79471	0.060257	0.497867	0.817847	1.86249	0.0984381	1.79471	0.96361	611.844	10.7579	605.249	20.703	606.847	16.8754	1.07789	0.263233	-15.278	27.298	Conc within Unc	605.249	20.703
2013-07-26	Nu Plasma HR	NDR4	ETH8A	41	-273.869	0.223771	0.0107294	n.d.	n.d.	1.58945	10.6682	1.68523	0.0573314	1.91867	0.740971	2.55368	0.0937362	1.68523	0.659921	503.314	42.2271	577.596	18.5941	562.972	21.8353	-14.7585	-2.59759	-36.459	-55.6873	Conc within Unc	577.596	18.5941
2013-07-26	Nu Plasma HR	NDR4	ETH8A	42	-329.074	0.469947	0.0225831	n.d.	n.d.	3.68493	11.6844	1.89423	0.0569787	0.84242	0.672366	2.07311	0.0855839	1.89423	0.913715	489.718	18.5837	529.366	19.2248	522.15	16.7865	-8.09626	-1.38205	-24.0029	-20.4241	Conc within Unc	529.366	19.2248
2013-07-26	Nu Plasma HR	NDR4	ETH8A	44	-286.028	0.653289	0.032927	n.d.	n.d.	4.74693	10.7042	1.8243	0.0587665	0.918891	0.756966	2.04266	0.0934212	1.8243	0.893104	557.476	20.0378	575.739	20.0645	572.258	17.7163	-3.27601	-0.60821	-21.1969	1.80146	Conc within Unc	575.739	20.0645
2013-07-26	Nu Plasma HR	NDR4	ETH8A	45	-307.534	0.309319	0.0170859	n.d.	n.d.	2.16835	10.3613	2.23569	0.063385	2.83979	0.843481	3.61424	0.0965134	2.23569	0.618578	720.218	60.2737	593.944	25.321	621.065	33.0391	17.5327	4.36684	-5.91824	151.595	Conc within Unc	593.944	25.321
2013-07-26	Nu Plasma HR	NDR4	ETH8A	46	-237.496	0.16918	0.00796335	n.d.	n.d.	1.19274	10.2643	1.73528	0.0567217	3.52599	0.761944	3.92986	0.0974255	1.73528	0.441562	479.734	77.9168	599.304	19.8311	575.131	33.9383	-24.9241	-4.20302	-58.1111	-99.7382	Conc within Unc	599.304	19.8311
2013-07-26	Nu Plasma HR	NDR4	ETH8A	47	-282.818	0.643753	0.029837	n.d.	n.d.	5.96231	13.7177	1.71098	0.0545001	0.568806	0.547792	1.80305	0.0728983	1.71098	0.948936	390.764	12.7654	453.593	14.9708	443.549	12.877	-16.0784	-2.26439	-22.9207	-47.8579	Conc within Unc	453.593	14.9708
2013-07-26	Nu Plasma HR	NDR4	ETH8A	50	-269.289	0.0974129	0.00492647	n.d.	n.d.	0.704578	10.6448	2.19078	0.0593664	3.20046	0.76896	3.87846	0.0939424	2.19078	0.564858	579.583	69.5308	578.811	24.2102	579.166	33.6732	0.133224	0.0613472	-33.3179	24.9824	Conc within Unc	578.811	24.2102
2013-07-25	Nu Plasma HR	NDR4	ETH8A	8	5.80632	0.553895	0.0325607	n.d.	n.d.	4.52758	10.4904	2.0905	0.0681496	1.07117	0.895719	2.34896	0.095325	2.0905	0.88997	872.177	22.1886	586.953	23.4139	649.437	22.2924	32.7025	9.62122	40.1913	261.81	Anchored	581	23
2013-07-25	Nu Plasma HR	NDR4	ETH8A	5	82.6306	0.0455982	0.0039589	n.d.	n.d.	0.314798	8.41992	4.58497	0.0990399	4.64459	1.62182	6.52642	0.118766	4.58497	0.702524	1605.28	86.6051	723.457	62.4499	978.697	78.8433	54.9326	26.0796	176.397	819.373	Anchored	692	61
2013-07-26	Nu Plasma HR	NDR4	ETH8A	24	-45.2712	0.203596	0.0116964	n.d.	n.d.	1.45017	10.9522	2.74587	0.0676688	2.21668	0.851899	3.52895	0.0913059	2.74587	0.778099	857.492	46.0234	563.256	29.5519	625.691	32.4429	34.3136	9.97862	29.9924	323.788	Anchored	557	29
2013-07-26	Nu Plasma HR	NDR4	ETH8A	29	-103.345	0.100205	0.00396509	n.d.	n.d.	0.657484	9.92233	2.48759	0.0456138	5.04233	0.633847	5.62256	0.100783	2.48759	0.44243	-23.841	122.095	618.995	29.2971	498.489	43.3573	2696.34	-24.1741	-163.863	-613.539	Anchored	630	30
2013-07-26	Nu Plasma HR	NDR4	ETH8A	34	-76.9643	0.210672	0.0148006	n.d.	n.d.	1.5841	11.435	2.19383	0.0830427	1.44504	1.0013	2.62698	0.0874505	2.19383	0.835115	1269.34	28.2047	540.441	22.7059	704.47	26.3465	57.4235	23.284	137.683	751.606	Anchored	524	22
2013-07-26	Nu Plasma HR	NDR4	ETH8A	35	-183.913	0.361088	0.0177023	n.d.	n.d.	2.89835	12.2422	2.09956	0.0569054	1.42342	0.640906	2.53659	0.0816846	2.09956	0.827711	486.876	31.4158	506.17	20.4093	502.867	19.9229	-3.96278	-0.65676	-23.2255	1.11548	Anchored	506	20
2013-07-26	Nu Plasma HR	NDR4	ETH8A	37	-167.771	0.0318096	0.00450255	n.d.	n.d.	0.206516	9.5435	4.911	0.162062	4.25763	2.3414	6.49964	0.104783	4.911	0.75558	2476.53	71.8367	642.38	59.7748	1224.95	88.5174	74.0613	47.5585	494.049	1893.92	Anchored	564	54
2013-07-26	Nu Plasma HR	NDR4	ETH8A	38	-214.286	0.0531766	0.00353788	n.d.	n.d.	0.348262	10.1074	2.51722	0.0832126	5.64818	1.13514	6.18372	0.098937	2.51722	0.407073	1273.33	110.18	608.176	29.1524	770.2	64.6593	52.2374	21.0366	97.3648	694.306	Anchored	591	29
2013-07-26	Nu Plasma HR	NDR4	ETH8A	48	-401.622	0.0592914	0.00259348	n.d.	n.d.	0.407049	10.0932	2.84918	0.0507081	6.90224	0.69271	7.46718	0.099077	2.84918	0.38156	226.546	159.514	608.997	33.0293	534.428	60.2338	-168.819	-13.9532	-134.804	-349.422	Anchored	616	34
Sample RSH07A - Wadi Hammamat, Egypt (modern river sand)
2013-05-20	Attom	NDR3	RSH7A	5	-65.8175	206.192	129.478	295.648	163.339	667.89	3.22021	10.4406	0.616459	8.51519	26.3831	13.4727	0.310538	10.4406	0.774942	4546.63	123.477	1743.36	311.321	3360.84	234.356	61.6561	48.1274	1383.13	2491.95	206 counts < 1000
2013-05-20	Attom	NDR3	RSH7A	9	-166.559	258.692	251.579	586.067	11.9004	300.298	1.02489	10.6436	1.03957	8.58687	139.791	13.6755	0.975714	10.6436	0.778294	5291.21	120.399	4389.56	644.388	5023.38	243.947	17.0405	12.6175	389.88	257.26	206 counts < 1000
2013-05-20	Attom	NDR3	RSH7A	14	-194.586	184.714	89.6646	121.034	-2.42248	1526.83	8.30609	8.83651	0.671772	17.8563	11.1463	19.9231	0.120394	8.83651	0.44353	4670.84	257.33	732.829	121.275	2535.44	316.43	84.3106	71.0965	1486.18	3816.73	206 counts < 1000
2013-05-20	Attom	NDR3	RSH7A	20	2498.14	53761.2	42699.9	109559	68723.8	52878.1	1.00537	3.73298	0.76202	1.69273	104.459	4.09884	0.99466	3.73298	0.91074	4851.71	24.1857	4451.08	235.639	4729.98	79.2719	8.25756	5.89655	199.634	164.994	7/6 > 0.5
2013-05-20	Attom	NDR3	RSH7A	23	-93.8431	40.9978	45.1601	76.6537	-1.11607	179.087	3.1002	25.7729	0.815853	26.1466	36.2683	36.7136	0.322559	25.7729	0.701999	4949.03	371.937	1802.22	763.375	3673.8	547.456	63.5844	50.9441	1324.13	2383.44	206 counts < 1000
2013-05-20	Attom	NDR3	RSH7A	32	-65.0832	45.573	34.867	55.8337	-3.20513	44.6429	3.47063	30.5727	0.584617	26.2592	23.215	40.3018	0.288132	30.5727	0.758594	4469.57	382.297	1632.19	826.38	3236	581.339	63.4822	49.5615	1022.47	2011	206 counts < 1000
2013-05-20	Attom	NDR3	RSH7A	39	23773.2	438039	356963	890297	258292	58359.4	0.130401	2.53785	0.794417	1.60183	839.599	3.00109	7.66863	2.53785	0.845642	4911.12	22.825	13922.4	283.145	6837.71	59.1178	-183.487	-103.612	-7143.8	-9294.42	7/6 > 0.5
2013-05-20	Attom	NDR3	RSH7A	37	-117.466	511.29	206.101	389.409	61.5271	3790.4	7.43344	6.98193	0.40565	13.2905	7.52087	15.0128	0.134527	6.98193	0.465064	3929.48	199.572	813.64	105.864	2175.48	238.703	79.2939	62.5994	1123.13	3009.98	206 counts < 1000
2013-05-20	Attom	NDR3	RSH7A	41	-62.3253	99.3466	27.5223	47.5682	11.1178	591.761	6.06559	15.8191	0.28876	28.6485	6.561	32.7258	0.164864	15.8191	0.483382	3410.24	445.725	983.753	282.38	2054.12	456.689	71.153	52.1084	613.681	2144.11	206 counts < 1000
2013-05-20	Attom	NDR3	RSH7A	2	53.5901	13069.3	860.872	157.922	5.12063	136436	10.2158	2.39182	0.0629712	2.98052	0.849523	3.82156	0.0978875	2.39182	0.625877	706.301	63.4045	602.017	27.4361	624.387	35.035	14.7649	3.58276	-12.6647	76.8484	Conc within Unc	602.017	27.4361
2013-05-20	Attom	NDR3	RSH7A	4	-157.561	11612.6	751.674	21.213	-2.42248	124207	10.5105	2.25392	0.0624144	2.32126	0.818403	3.23549	0.0951429	2.25392	0.696625	687.379	49.5335	585.882	25.1967	607.157	29.1493	14.7658	3.50413	-7.87379	76.3005	Conc within Unc	585.882	25.1967
2013-05-20	Attom	NDR3	RSH7A	8	39.7744	8153.97	512.902	40.4636	-2.42248	86831.1	10.5489	2.78609	0.0592272	2.69838	0.773781	3.8786	0.0947962	2.78609	0.718323	574.481	58.6733	583.84	31.0281	581.93	33.7914	-1.62908	-0.328268	-35.7017	-40.3868	Conc within Unc	583.84	31.0281
2013-05-20	Attom	NDR3	RSH7A	10	-48.7465	9670.03	615.655	40.4299	-2.42248	96284.3	9.76381	2.60721	0.0611341	2.40903	0.862919	3.54979	0.102419	2.60721	0.73447	642.989	51.7848	628.57	31.1537	631.715	32.8544	2.24244	0.497905	-29.709	-16.735	Conc within Unc	628.57	31.1537
2013-05-20	Attom	NDR3	RSH7A	15	-224.923	124894	7934.9	82.4899	167.536	1254872	9.75908	2.24314	0.0601259	1.51632	0.849101	2.70756	0.102469	2.24314	0.828472	607.137	32.7903	628.86	26.8241	624.155	24.9398	-3.57791	-0.753817	-29.6448	-48.547	Conc within Unc	628.86	26.8241
2013-05-20	Attom	NDR3	RSH7A	17	-147.182	10181.2	621.168	62.5826	-2.42248	108903	10.5723	2.61061	0.0596806	2.21116	0.777981	3.42119	0.0945867	2.61061	0.763071	591.039	47.9456	582.606	29.0196	584.331	29.9541	1.42667	0.29515	-28.2295	-20.5874	Conc within Unc	582.606	29.0196
2013-05-20	Attom	NDR3	RSH7A	22	-107.059	5488.77	397.109	74.8911	98.4213	45008	8.37662	2.80655	0.0667613	3.64481	1.0984	4.60014	0.11938	2.80655	0.6101	829.398	76.012	726.993	38.4749	752.578	47.7585	12.3468	3.39963	-22.1736	63.9296	Conc within Unc	726.993	38.4749
2013-05-20	Attom	NDR3	RSH7A	25	-278.424	120994	7702.25	62.9688	-1.11607	1066230	8.84768	2.01827	0.0617072	1.41871	0.961197	2.46701	0.113024	2.01827	0.818103	663.014	30.3957	690.286	26.3697	683.916	24.2618	-4.11333	-0.931326	-30.6313	-53.6416	Conc within Unc	690.286	26.3697
2013-05-20	Attom	NDR3	RSH7A	26	-60.7194	48576.7	3166.95	246.903	115.63	513529	10.3625	2.02253	0.061673	1.5327	0.820234	2.53767	0.0965021	2.02253	0.797	661.825	32.8445	593.877	22.9086	608.179	22.9608	10.2667	2.35156	-8.65911	45.039	Conc within Unc	593.877	22.9086
2013-05-20	Attom	NDR3	RSH7A	29	-37.371	7495.14	470.183	14.7127	-3.20513	74723.6	9.84155	2.56546	0.0612865	3.06946	0.858237	4.0004	0.10161	2.56546	0.641302	648.337	65.923	623.837	30.4367	629.16	36.844	3.77887	0.845957	-31.5216	-5.93684	Conc within Unc	623.837	30.4367
2013-05-20	Attom	NDR3	RSH7A	30	1.86039	14505.3	908.613	65.3596	-3.20513	152154	10.2121	2.37177	0.0602614	2.25194	0.813261	3.27056	0.0979231	2.37177	0.725188	612	48.6586	602.226	27.2155	604.282	29.3601	1.59709	0.340205	-27.3043	-17.4414	Conc within Unc	602.226	27.2155
2013-05-20	Attom	NDR3	RSH7A	36	61.8252	34246.8	2180.55	76.2998	-3.20513	345420	9.94214	2.07277	0.0610424	1.85728	0.84617	2.78314	0.100582	2.07277	0.744759	639.761	39.9457	617.819	24.3767	622.545	25.5799	3.42984	0.759194	-20.8536	-2.43388	Conc within Unc	617.819	24.3767
2013-05-20	Attom	NDR3	RSH7A	38	-2.37282	29535.8	1864.22	34.6971	-3.20513	334250	11.0594	2.2776	0.0596817	1.89125	0.743729	2.96045	0.0904207	2.2776	0.769342	591.079	41.0084	558.024	24.3041	564.579	25.3237	5.59219	1.16102	-18.7688	8.75013	Conc within Unc	558.024	24.3041
2013-05-20	Attom	NDR3	RSH7A	1	-112.284	19496.9	1225.13	56.0036	-2.42248	191491	9.90011	2.27231	0.0599765	1.68039	0.834925	2.82615	0.101009	2.27231	0.804032	601.755	36.3711	620.319	26.8214	616.341	25.7845	-3.08498	-0.645436	-29.7626	-45.3854	Anchored	621	27
2013-05-20	Attom	NDR3	RSH7A	3	-2.47707	9505.6	1235.02	1723.7	455.209	89422.5	9.58862	2.56573	0.125954	2.5494	1.81035	3.61696	0.10429	2.56573	0.709361	2041.45	45.0713	639.503	31.1652	1049.2	46.2464	68.6742	39.0488	363.455	1370.79	Anchored	589	29
2013-05-20	Attom	NDR3	RSH7A	6	-107.361	22901.8	1455.43	284.813	979.601	276538	11.8736	2.6312	0.0621477	1.9439	0.721351	3.27139	0.0842202	2.6312	0.804308	678.232	41.5436	521.263	26.2975	551.464	27.4652	23.1438	5.47649	2.73568	130.672	Anchored	519	26
2013-05-20	Attom	NDR3	RSH7A	7	-38.6937	8048.7	3243.4	6854.49	3525.75	43969.8	5.45037	4.16234	0.375037	3.96465	9.48317	5.74835	0.183474	4.16234	0.724093	3811.21	59.985	1085.92	82.6635	2385.92	100.462	71.5071	54.4861	1199.53	2642.62	Anchored	685	69
2013-05-20	Attom	NDR3	RSH7A	11	18.328	12313.9	829.17	96.6523	-2.42248	115373	9.14808	2.23947	0.0661386	2.20739	0.996394	3.14449	0.109313	2.23947	0.71219	809.824	46.1786	668.755	28.3892	701.978	31.381	17.4197	4.73276	1.84194	112.68	Anchored	665	29
2013-05-20	Attom	NDR3	RSH7A	12	88.9059	10634.2	830.037	367.864	64.5421	91794.1	8.58116	2.56666	0.0749999	4.21449	1.20454	4.93454	0.116534	2.56666	0.520142	1067.59	84.7195	710.586	34.4459	802.678	53.328	33.4404	11.4732	38.7649	322.562	Anchored	700	35
2013-05-20	Attom	NDR3	RSH7A	13	-35.0352	17697.7	1592.28	1277.56	756.359	179650	10.0638	2.63673	0.0865747	2.10943	1.18559	3.37669	0.0993658	2.63673	0.780862	1350.18	40.7067	610.691	30.6532	793.913	36.5326	54.7696	23.0783	146.689	708.833	Anchored	591	30
2013-05-20	Attom	NDR3	RSH7A	16	-42.15	3025.6	237.829	175.163	151.673	29356.4	9.54006	3.14793	0.0781148	4.31872	1.12846	5.34423	0.104821	3.14793	0.589034	1148.9	85.774	642.601	38.3916	767.021	55.9683	44.0682	16.2213	68.4522	467.908	Anchored	629	38
2013-05-20	Attom	NDR3	RSH7A	18	-277.258	4978.29	358.604	62.6424	-2.42248	54253.8	10.9025	2.96827	0.065519	3.50669	0.828224	4.59429	0.0917223	2.96827	0.646077	790.102	73.5919	565.715	32.0725	612.626	41.4105	28.3998	7.65746	5.50111	192.315	Anchored	561	32
2013-05-20	Attom	NDR3	RSH7A	19	-70.0186	3182.6	492.416	842.201	49.0482	28759	9.01876	4.40968	0.145121	5.63414	2.21763	7.15464	0.11088	4.40968	0.616339	2288.44	96.9275	677.857	56.4985	1186.62	95.5029	70.3791	42.8751	413.263	1554.08	Anchored	610	53
2013-05-20	Attom	NDR3	RSH7A	21	-28.991	5067.44	381.412	106.628	35.9603	43573.7	8.43892	2.53172	0.0720452	2.95836	1.17659	3.89378	0.118499	2.53172	0.650196	986.302	60.2052	721.916	34.4888	789.723	41.8692	26.8058	8.5861	25.9372	229.897	Anchored	714	35
2013-05-20	Attom	NDR3	RSH7A	24	56.7556	1238.57	135.91	136.362	8.41784	11370.4	9.12901	3.51441	0.151107	11.1615	2.28121	11.7017	0.109541	3.51441	0.300333	2357.72	190.623	670.081	44.5791	1206.49	153.071	71.5792	44.4603	383.339	1643.06	Anchored	598	48
2013-05-20	Attom	NDR3	RSH7A	27	26.4164	4808.37	876.554	1180.62	1437.52	40721.5	8.42906	3.58089	0.157995	7.60866	2.58327	8.40919	0.118637	3.58089	0.425831	2433.55	128.936	722.715	48.7783	1295.91	116.203	70.302	44.231	456.99	1662.06	Anchored	640	49
2013-05-20	Attom	NDR3	RSH7A	28	-50.1231	12711.8	954.242	484.748	97.369	137604	10.4591	2.39631	0.0733205	3.85584	0.966138	4.5398	0.095611	2.39631	0.527844	1021.92	78.0454	588.636	26.9051	686.471	44.321	42.3987	14.2519	53.5143	406.374	Anchored	579	27
2013-05-20	Attom	NDR3	RSH7A	31	-141.715	13823.4	1120.45	265.382	279.695	138702	9.76644	2.41312	0.0761963	2.80782	1.07523	3.7023	0.102391	2.41312	0.651789	1099.33	56.1759	628.408	28.8325	741.305	38.2267	42.8373	15.2295	74.67	442.091	Anchored	617	29
2013-05-20	Attom	NDR3	RSH7A	33	-34.9062	1498.95	127.183	91.5157	-3.20513	15208.4	10.1753	3.21184	0.102903	9.50662	1.39375	10.0345	0.0982767	3.21184	0.320079	1676.3	175.653	604.302	36.9484	886.288	112.213	63.9502	31.8165	169.772	1035.05	Anchored	573	38
2013-05-20	Attom	NDR3	RSH7A	34	-93.8973	9476.19	657.142	122.472	425.965	102305	10.7031	2.40211	0.0676779	3.35681	0.871448	4.12775	0.0934306	2.40211	0.581942	857.771	69.692	575.794	26.4088	636.353	38.3019	32.8732	9.51658	22.2572	255.567	Anchored	570	26
2013-05-20	Attom	NDR3	RSH7A	35	43.7489	9963.83	681.218	146.179	259.508	103816	10.3778	2.30793	0.0660849	3.03373	0.87761	3.81184	0.0963592	2.30793	0.605465	808.125	63.4829	593.037	26.0995	639.691	35.5521	26.6157	7.29319	11.1018	188.989	Anchored	588	26
2013-05-20	Attom	NDR3	RSH7A	40	27.3722	5758.87	557.026	480.929	216.662	59294.4	10.1921	2.44771	0.0908245	2.97639	1.22813	3.85359	0.098115	2.44771	0.635176	1442.07	56.7156	603.353	28.1351	813.487	42.2439	58.1606	25.8313	167.89	810.581	Anchored	581	27
Sample RSH09A - Wadi Kharit, Egypt (sandstone bedrock)
2013-05-20	Attom	NDR3	RSH9A	4	-299.997	819.001	548.387	1255.39	10303	2372.4	2.81601	6.22233	0.633422	4.91694	31.0002	7.93056	0.355112	6.22233	0.784602	4585.95	71.1577	1958.97	206.874	3519.06	145.134	57.2833	44.3327	1414.96	2420.11	7/6 > 0.5
2013-05-20	Attom	NDR3	RSH9A	10	76.3641	826.71	542.062	1354.02	21670.2	2857.07	3.37076	4.86025	0.647878	6.04865	26.4893	7.75939	0.296669	4.86025	0.62637	4618.58	87.393	1674.77	141.796	3364.77	141.508	63.7385	50.2264	1548.5	2802.01	7/6 > 0.5
2013-05-20	Attom	NDR3	RSH9A	13.2	-76.9504	13462.8	1167.94	773.001	1313.54	126963	9.25743	2.48398	0.0849074	4.00793	1.26404	4.71526	0.108021	2.48398	0.526796	1312.55	77.7514	661.247	31.1465	829.722	52.1018	49.6214	20.305	116.373	620.16	Poorer duplicate
2013-05-20	Attom	NDR3	RSH9A	15	20.5887	4143.11	3578.84	8420.63	22962.5	4306.07	0.988408	4.76684	0.833352	2.91816	116.198	5.58914	1.01173	4.76684	0.852876	4979.19	41.4556	4506	301.901	4837.15	106.723	9.50336	6.84582	224.419	171.29	7/6 > 0.5
2013-05-20	Attom	NDR3	RSH9A	18.2	39.5412	12170.5	1884.77	2683.16	2663.22	122508	9.89749	2.86897	0.14782	2.78775	2.05832	4.00032	0.101036	2.86897	0.717186	2320.09	47.799	620.476	33.8538	1135.06	53.2532	73.2564	45.3356	461.334	1665.76	Duplicate
2013-05-20	Attom	NDR3	RSH9A	23	-21.2094	1647.61	1182.5	2915.49	2955.23	5166.48	3.01902	4.15249	0.706651	3.21218	32.2586	5.24988	0.331234	4.15249	0.790969	4743.66	46.1286	1844.36	131.852	3558.22	98.474	61.1195	48.1663	1615.39	2767.45	7/6 > 0.5
2013-05-20	Attom	NDR3	RSH9A	28.2	70.1255	28847.3	2386.15	1107.7	335.356	312523	10.61	2.92059	0.0795567	3.38007	1.0334	4.46707	0.0942508	2.92059	0.653804	1185.13	66.7772	580.628	32.3517	720.626	45.0869	51.0073	19.4273	94.911	572.152	Duplicate
2013-05-20	Attom	NDR3	RSH9A	29	680.595	15844.2	13376.1	29146.8	39524.4	45410.8	2.81504	3.25674	0.78837	2.56082	38.5968	4.14297	0.355235	3.25674	0.78609	4900.23	36.5079	1959.55	109.132	3735.34	78.8656	60.0111	47.5403	1696.93	2831.55	7/6 > 0.5
2013-05-20	Attom	NDR3	RSH9A	30	-86.8039	11953.8	829.318	56.0475	7.24569	127159	10.7308	2.63782	0.0674429	3.04008	0.866184	4.02495	0.0931897	2.63782	0.655369	850.547	63.1883	574.374	28.9262	633.493	37.2465	32.47	9.33227	21.8727	247.247	Use concordant point
2013-05-20	Attom	NDR3	RSH9A	30.3	-44.9728	8487.93	583.937	20.6525	-1.19048	87558.8	10.1369	2.29703	0.0661095	2.90889	0.898804	3.70648	0.0986496	2.29703	0.619733	808.903	60.863	606.49	26.5373	651.088	35.0184	25.0231	6.84977	9.57965	175.875	Use concordant point
2013-05-20	Attom	NDR3	RSH9A	32	-215.359	120525	7335.15	70.834	-1.34892	1379579	11.1596	2.41848	0.0584986	1.47514	0.72244	2.83286	0.0896087	2.41848	0.853725	547.505	32.222	553.222	25.5922	552.106	23.8469	-1.04436	-0.202174	-24.9632	-31.3102	Conc within Unc
2013-05-20	Attom	NDR3	RSH9A	32.3	-257.993	104942	6547.15	26.1349	-1.19048	1159160	10.7533	2.07817	0.0594529	1.56804	0.761972	2.60337	0.0929951	2.07817	0.798262	582.745	34.0478	573.226	22.7564	575.147	22.6095	1.63339	0.333992	-20.6886	-13.238	Conc within Unc
2013-05-20	Attom	NDR3	RSH9A	33.2	-29.9123	13516	1314.33	1466.6	11146.8	116406	9.59511	4.13113	0.093317	13.4845	1.34035	14.1031	0.10422	4.13113	0.292923	1493.48	255.174	639.091	50.0754	863.379	152.051	57.2079	25.9779	72.2367	804.311	Use concordant point
2013-05-20	Attom	NDR3	RSH9A	33.3	3122.89	69368	52531.3	130213	880327	127153	1.83782	5.71921	0.720992	2.23891	54.0671	6.14183	0.544123	5.71921	0.93119	4772.49	32.1079	2800.68	254.736	4070.22	115.621	41.3161	31.1908	1153.91	1717.07	7/6 > 0.5
2013-05-20	Attom	NDR3	RSH9A	36	-83.7193	1262.59	1102.96	2704.92	13809.2	1702.71	1.30047	5.23563	0.855851	3.56112	90.6993	6.33194	0.768953	5.23563	0.826861	5017.01	50.5056	3676.96	286.945	4588.02	119.828	26.7102	19.8575	791.239	1053.11	7/6 > 0.5
2013-05-20	Attom	NDR3	RSH9A	41	-47.9034	1143.57	669.615	1581.38	7617.54	3950.14	3.3917	4.22227	0.582182	4.48805	23.6563	6.16199	0.294838	4.22227	0.685212	4463.49	65.3605	1665.66	122.778	3254.34	113.477	62.6826	48.8173	1475.2	2675.05	7/6 > 0.5
2013-05-20	Attom	NDR3	RSH9A	45.2	-206.113	2092.63	159.636	92.0937	-1.19048	22648.2	10.898	3.14356	0.07468	4.87318	0.944414	5.79913	0.0917597	3.14356	0.542075	1059	98.0869	565.936	33.9743	675.19	55.647	46.5593	16.1812	53.607	459.087	Duplicate
2013-05-20	Attom	NDR3	RSH9A	51	-134.045	6401.92	504.382	232.108	562.259	72880.7	11.556	2.84178	0.0772392	3.29078	0.921164	4.34798	0.0865353	2.84178	0.653586	1126.48	65.5742	535.014	29.1143	662.975	41.4781	52.5055	19.3011	86.4832	562.347	Duplicate
2013-05-20	Attom	NDR3	RSH9A	51.3	-178.156	8784.1	605.28	97.6704	180.414	96246.6	10.8688	2.70789	0.0669304	3.23291	0.848684	4.21715	0.0920061	2.70789	0.642113	834.672	67.3655	567.39	29.3482	623.927	38.5733	32.0224	9.06135	17.9629	237.934	Duplicate
2013-05-20	Attom	NDR3	RSH9A	51.4	111.958	5247.41	492.546	425.735	1558.07	54964.8	10.3687	2.76434	0.0893465	3.4625	1.18758	4.43063	0.0964445	2.76434	0.623916	1410.74	66.261	593.539	31.2735	794.836	47.7069	57.9271	25.3256	153.59	785.926	Duplicate
2013-05-20	Attom	NDR3	RSH9A	53	113.533	35.4886	28.1724	69.7995	6.80809	38.8856	-0.0531384	35.563	-0.221371	67.4811	574.14	76.2786	-18.8188	35.563	0.466225											Failed
2013-05-20	Attom	NDR3	RSH9A	55	-109.31	131.542	56.9604	120.925	-1.34409	684.227	5.01854	11.4102	0.532337	25.4413	14.6189	27.8828	0.199261	11.4102	0.409219	4332.69	373.112	1171.35	239.907	2790.76	426.455	72.9648	58.0276	1192.96	2921.43	7/6 > 0.5
2013-05-20	Attom	NDR3	RSH9A	56.2	0.235936	3275.54	327.745	277.026	678.642	36111.9	10.8227	2.75795	0.0990778	3.36447	1.26167	4.3504	0.0923985	2.75795	0.633954	1605.99	62.7296	569.707	30.006	828.659	48.1253	64.5262	31.2496	210.827	1006.28	Duplicate
2013-05-20	Attom	NDR3	RSH9A	57	-82.4107	1996.72	143.365	44.3466	9.62084	22470.5	11.2578	3.94283	0.0696054	4.68666	0.852109	6.12459	0.0888273	3.94283	0.64377	915.809	96.4204	548.598	41.3381	625.806	55.6681	40.0969	12.3374	21.5401	325.873	Duplicate
2013-05-20	Attom	NDR3	RSH9A	57.2	14.5928	2119.56	238.376	303.367	1776.65	21179	10.2818	4.9925	0.110638	5.18953	1.483	7.20113	0.0972597	4.9925	0.693294	1809.1	94.3089	598.33	56.8035	923.459	83.7883	66.9266	35.2078	241.341	1153.96	Duplicate
2013-05-20	Attom	NDR3	RSH9A	57.3	-106.573	2266.42	297.25	382.072	17.7828	21727.6	9.56304	3.3482	0.130272	3.22195	1.87742	4.64666	0.104569	3.3482	0.720561	2100.85	56.5788	641.131	40.7378	1073.15	59.7741	69.4823	40.2573	372.248	1418.98	Duplicate
2013-05-20	Attom	NDR3	RSH9A	68	-275.356	3856.56	281.313	28.6966	13.5369	46858.8	11.7786	4.31122	0.0698972	4.48439	0.817845	6.22064	0.0848995	4.31122	0.693051	924.41	92.1359	525.301	43.3514	606.845	55.3005	43.1745	13.4374	26.2435	355.758	Duplicate
2013-05-20	Attom	NDR3	RSH9A	68.3	-228.799	3356.8	913.069	1777.42	397.25	28099.2	8.05003	3.24013	0.252163	5.0786	4.31707	6.02416	0.124223	3.24013	0.537855	3197.68	80.3191	754.825	45.9949	1696.63	94.7654	76.3946	55.5102	847.036	2396.86	Duplicate
2013-05-20	Attom	NDR3	RSH9A	71	1.62867	7269.61	550.273	226.119	28.5636	85892.3	11.6107	2.81498	0.0722321	2.7729	0.857393	3.95134	0.0861278	2.81498	0.712412	991.573	56.3854	532.596	28.7156	628.698	36.3811	46.2878	15.286	59.7216	430.262	Duplicate
2013-05-20	Attom	NDR3	RSH9A	71.3	23.8249	7474.38	746.718	798.838	2179.47	82948.2	10.8482	3.83803	0.0965151	3.69667	1.22615	5.32878	0.0921812	3.83803	0.720246	1556.98	69.3665	568.424	41.6295	812.584	57.9203	63.4918	30.0474	186.24	946.922	Duplicate
2013-05-20	Attom	NDR3	RSH9A	73	69.6078	20863.7	1265.94	16.2948	-1.04167	236758	11.4233	2.61309	0.0587467	1.87244	0.708756	3.21469	0.0875402	2.61309	0.812858	556.74	40.8363	540.973	27.0616	544.007	26.7232	2.83193	0.557748	-23.689	-11.2951	Duplicate
2013-05-20	Attom	NDR3	RSH9A	73.3	76.5265	17663.1	1059.09	-15.0026	-1.19048	201076	11.2788	2.22618	0.0578375	1.8036	0.706731	2.86511	0.0886621	2.22618	0.776997	522.627	39.5637	547.62	23.3328	542.803	23.8115	-4.78217	-0.887384	-28.6283	-48.3257	Duplicate
2013-05-20	Attom	NDR3	RSH9A	73.4	-16.2462	17937.3	1088.98	9.87333	-1.19048	205743	11.4081	2.49767	0.0587686	1.86563	0.709968	3.11752	0.0876571	2.49767	0.801172	557.555	40.6824	541.666	25.9004	544.727	25.9513	2.84984	0.56198	-22.89	-10.011	Duplicate
2013-05-20	Attom	NDR3	RSH9A	74.1	-201.713	6481.11	411.295	44.7156	-1.19048	76352.9	11.6655	2.30406	0.0597882	2.28048	0.706348	3.2418	0.085723	2.30406	0.710734	594.945	49.4162	530.192	23.4116	542.576	26.8927	10.8838	2.28232	-14.5094	41.3413	Duplicate
2013-05-20	Attom	NDR3	RSH9A	75.2	-121.823	15335.8	957.18	10.6245	-1.19048	163866	10.715	2.33114	0.060384	2.2934	0.776667	3.27015	0.0933268	2.33114	0.712853	616.393	49.518	575.183	25.6041	583.58	28.6234	6.68577	1.43898	-20.2258	15.6065	Duplicate
2013-05-20	Attom	NDR3	RSH9A	75.3	-77.9018	15140.3	918.705	1.16132	-1.19048	167818	10.8777	2.46419	0.0589116	1.96806	0.746395	3.15365	0.0919309	2.46419	0.781377	562.852	42.8775	566.947	26.6925	566.13	27.0091	-0.727448	-0.144188	-27.8254	-30.787	Duplicate
2013-05-20	Attom	NDR3	RSH9A	75.4	-45.2611	15574	973.91	34.6373	-1.19048	167590	10.5502	2.37098	0.0597127	1.66512	0.780034	2.89727	0.0947853	2.37098	0.81835	592.205	36.0984	583.776	26.4118	585.503	25.4611	1.42323	0.294924	-23.7343	-17.9834	Duplicate
2013-05-20	Attom	NDR3	RSH9A	80	-93.391	3644.01	238.072	40.9725	-1.04167	40335.2	11.2175	3.06907	0.0663428	3.30098	0.815088	4.50729	0.0891466	3.06907	0.680913	816.27	68.9856	550.488	32.3061	605.304	40.2937	32.5605	9.05598	14.5226	233.475	Duplicate
2013-05-20	Attom	NDR3	RSH9A	80.3	54.5967	6078.34	578.427	532.865	4166.9	64351.5	10.1324	2.64821	0.0911493	2.34727	1.23979	3.53874	0.0986934	2.64821	0.748349	1448.87	44.6862	606.747	30.5972	818.786	39.0191	58.1227	25.8967	173.02	811.524	Duplicate
2013-05-20	Attom	NDR3	RSH9A	80.4	-85.7636	4804.52	383.924	235.511	510.667	49835.4	10.2938	2.62782	0.0779501	2.5859	1.04363	3.68677	0.0971456	2.62782	0.712769	1144.71	51.3901	597.66	29.9291	725.721	37.5317	47.7893	17.6461	90.53	517.118	Duplicate
2013-05-20	Attom	NDR3	RSH9A	81	6476.08	123472	103465	264672	2495411	119913	0.953282	2.63175	0.78599	1.38061	113.632	2.9719	1.04901	2.63175	0.885545	4895.92	19.6862	4624.37	171.412	4814.67	58.1297	5.5464	3.95252	132.171	100.135	7/6 > 0.5
2013-05-20	Attom	NDR3	RSH9A	64	-7.6557	177.078	62.0934	144.859	622.464	1054.3	5.33602	11.317	0.407586	14.758	10.5271	18.5977	0.187405	11.317	0.608518	3936.63	221.509	1107.3	226.266	2482.31	296.934	71.8717	55.3921	1078.07	2603.06	206 counts < 1000
2013-05-20	Attom	NDR3	RSH9A	35	-59.6839	80.7296	76.5703	65.1048	-1.34892	488.428	6.18648	19.7083	0.327717	47.2321	7.30065	51.179	0.161643	19.7083	0.385087	3605.75	724.583	965.9	344.219	2148.89	651.87	73.2122	55.0512	531.119	2295.63	206 counts < 1000
2013-05-20	Attom	NDR3	RSH9A	1	20.014	60776.2	4037.43	300.558	222.36	569224	9.29027	2.61457	0.0649131	1.90079	0.962963	3.23249	0.107639	2.61457	0.808841	770.574	40.0157	659.024	32.6754	684.83	31.7028	14.4762	3.76825	-5.89671	78.8741	Conc within Unc	659.024	32.6754
2013-05-20	Attom	NDR3	RSH9A	6	-70.8791	71847	4487.56	90.4255	-2.21894	843181	11.664	2.43075	0.0597298	1.70391	0.70575	2.96848	0.0857342	2.43075	0.818854	592.825	36.9356	530.259	24.6994	542.22	24.6405	10.5539	2.20586	-12.6799	37.8666	Conc within Unc	530.259	24.6994
2013-05-20	Attom	NDR3	RSH9A	12	-53.6588	4434.37	293.806	78.3711	-2.21894	49017.3	10.7968	2.91136	0.0645819	3.4331	0.824367	4.50135	0.0926198	2.91136	0.646774	759.796	72.3998	571.012	31.7401	610.482	40.4878	24.8466	6.4653	-1.01831	157.044	Conc within Unc	571.012	31.7401
2013-05-20	Attom	NDR3	RSH9A	13	-279.11	14268.9	972.672	87.1731	-2.21894	155204	10.6508	2.93735	0.0630349	2.25813	0.815651	3.70502	0.0938896	2.93735	0.792803	708.451	48.0203	578.5	32.4232	605.619	33.25	18.3431	4.47797	-6.13064	97.5285	Conc within Unc	578.5	32.4232
2013-05-20	Attom	NDR3	RSH9A	30.2	-120.306	9430.56	630.826	38.4752	-1.19048	95853.5	9.81245	2.42678	0.0646818	2.89965	0.908469	3.78117	0.101911	2.42678	0.641807	763.054	61.1179	625.6	28.8723	656.244	35.9095	18.0136	4.6695	-5.26619	108.581	Conc within Unc	625.6	28.8723
2013-05-20	Attom	NDR3	RSH9A	32.2	-175.163	99315.4	6184.5	36.0034	-1.19048	1083791	10.7335	2.11345	0.0587916	1.69361	0.754884	2.70832	0.0931663	2.11345	0.780356	558.408	36.9258	574.236	23.181	571.054	23.3873	-2.83444	-0.557143	-26.5689	-39.0087	3 concs regressed	568	14
2013-05-20	Attom	NDR3	RSH9A	33	137.702	13358.4	815.948	110.177	-1.34892	152145	11.3141	2.62142	0.0594643	2.09427	0.72434	3.35526	0.0883854	2.62142	0.781286	583.159	45.471	545.981	27.3879	553.225	28.2264	6.37529	1.30953	-20.9817	9.79015	Conc within Unc	545.981	27.3879
2013-05-20	Attom	NDR3	RSH9A	46	-225.337	46504.9	3028.54	81.598	-1.34892	530277	11.1609	2.4942	0.0609769	1.8495	0.752959	3.10511	0.0895983	2.4942	0.803258	637.452	39.7937	553.161	26.3891	569.94	26.7305	13.2231	2.94394	-9.95183	57.9022	Conc within Unc	553.161	26.3891
2013-05-20	Attom	NDR3	RSH9A	60	-11.288	10776.9	690.141	47.9777	-1.34409	117738	10.5508	2.65139	0.0609732	2.22508	0.796451	3.46134	0.0947795	2.65139	0.766002	637.321	47.8756	583.742	29.5267	594.825	30.6949	8.40689	1.86322	-19.612	24.0522	Conc within Unc	583.742	29.5267
2013-05-20	Attom	NDR3	RSH9A	63	-12.4453	15419.3	971.208	35.0641	-1.34409	167332	10.6127	2.64975	0.0605643	2.22074	0.786496	3.45729	0.0942267	2.64975	0.766423	622.826	47.8978	580.486	29.3515	589.183	30.4483	6.79796	1.47599	-21.752	12.9879	Conc within Unc	580.486	29.3515
2013-05-20	Attom	NDR3	RSH9A	65	30.2092	28744	1743.02	19.6056	-1.34409	314519	10.8386	2.67915	0.0579097	1.82222	0.736352	3.24012	0.0922633	2.67915	0.826869	525.359	39.9536	568.908	29.1116	560.275	27.5276	-8.28942	-1.54099	-36.1613	-72.6609	Conc within Unc	568.908	29.1116
2013-05-20	Attom	NDR3	RSH9A	67	-93.4988	34803.7	2238.59	14.4438	-1.34409	376444	10.4693	2.58803	0.0605167	1.46221	0.79664	2.97253	0.095517	2.58803	0.870647	621.131	31.5465	588.083	29.0269	594.932	26.4196	5.32053	1.1511	-19.5713	4.02053	Conc within Unc	588.083	29.0269
2013-05-20	Attom	NDR3	RSH9A	69	-100.563	7866.51	481.365	13.5123	-1.34409	83902.1	10.4682	2.88031	0.059838	2.12284	0.787789	3.57807	0.0955273	2.88031	0.804989	596.746	45.9862	588.144	32.3	589.917	31.5242	1.44157	0.300643	-29.7506	-23.6975	Conc within Unc	588.144	32.3
2013-05-20	Attom	NDR3	RSH9A	70	-31.3002	14030.9	875.957	-6.53095	-1.34409	149016	10.5191	2.53009	0.0595801	2.00781	0.780597	3.22996	0.0950648	2.53009	0.783319	587.382	43.5629	585.422	28.2561	585.824	28.3557	0.333723	0.0686206	-27.9537	-26.2959	Conc within Unc	585.422	28.2561
2013-05-20	Attom	NDR3	RSH9A	72	37.9482	59891.7	3706.99	23.2458	-1.04167	652552	10.937	2.58309	0.0593227	1.61176	0.747528	3.04469	0.0914325	2.58309	0.848393	577.982	35.0252	564.004	27.839	566.789	26.1102	2.41853	0.491458	-23.3247	-13.8603	Conc within Unc	564.004	27.839
2013-05-20	Attom	NDR3	RSH9A	73.2	31.502	17751.8	1089.76	34.4883	-1.19048	200112	11.0317	2.21045	0.0594008	1.87832	0.742091	2.90072	0.0906481	2.21045	0.762036	580.841	40.7982	559.369	23.6432	563.625	24.7879	3.69671	0.755108	-20.5319	-2.17122	Mean of 4 conc	548	12
2013-05-20	Attom	NDR3	RSH9A	74	80.123	7351.56	452.149	44.9155	-1.04167	89397.9	11.9974	2.8164	0.0592837	2.64887	0.68101	3.86635	0.0833514	2.8164	0.72844	576.551	57.5768	516.096	27.8771	527.385	31.3205	10.4857	2.14057	-20.0315	32.5781	Mean of 2 conc	524	18
2013-05-20	Attom	NDR3	RSH9A	75	-12.1349	16564.5	1039.37	29.8247	-1.04167	183450	10.9208	2.59346	0.059889	1.86942	0.755785	3.19699	0.0915684	2.59346	0.811218	598.591	40.4841	564.806	27.9885	571.576	27.5689	5.64405	1.18432	-20.7996	5.79631	Mean of 4 conc	573	13
2013-05-20	Attom	NDR3	RSH9A	76	-79.8332	63493.6	4056.85	469.618	2006.71	657575	10.2803	2.51618	0.0615195	1.76567	0.82473	3.07388	0.0972731	2.51618	0.818568	656.484	37.8702	598.409	28.6946	610.684	27.8288	8.84639	2.0101	-15.5535	29.3804	Conc within Unc	598.409	28.6946
2013-05-20	Attom	NDR3	RSH9A	78	-20.0082	4014.11	241.654	-7.45618	-1.04167	44755	10.7773	3.14211	0.0556029	2.97609	0.711038	4.32782	0.0927873	3.14211	0.726027	435.547	66.27	572.001	34.3058	545.362	35.8811	-31.3292	-4.88458	-62.5198	-170.759	Conc within Unc	572.001	34.3058
2013-05-20	Attom	NDR3	RSH9A	80.2	-42.1496	3673.62	230.638	12.67	10.2891	40005.3	10.9993	2.91218	0.0604417	3.20242	0.757318	4.32855	0.0909151	2.91218	0.672786	618.453	69.1213	560.947	31.2148	572.462	37.1922	9.29832	2.01146	-25.6773	26.2909	Conc within Unc	560.947	31.2148
2013-05-20	Attom	NDR3	RSH9A	84	-7.91938	16184.1	1038.81	18.8598	-1.04167	173771	10.3873	2.77023	0.0611586	2.15562	0.811447	3.51011	0.0962712	2.77023	0.789215	643.85	46.3308	592.52	31.2888	603.265	31.4394	7.97241	1.78123	-20.6939	20.0416	Conc within Unc	592.52	31.2888
2013-05-20	Attom	NDR3	RSH9A	2	-299.257	14555.9	1050.98	110.151	-2.21894	142799	9.57007	2.76505	0.0677842	2.4924	0.976156	3.72258	0.104492	2.76505	0.742779	861.029	51.7191	640.683	33.6388	691.632	36.6721	25.591	7.36648	14.2769	186.707	Anchored	635	34
2013-05-20	Attom	NDR3	RSH9A	3	-61.5072	18306.2	1756.94	1635.85	15011.3	188905	10.122	2.64978	0.09132	2.37279	1.24338	3.55689	0.0987946	2.64978	0.744971	1452.43	45.1504	607.341	30.6438	820.415	39.2652	58.1844	25.9714	173.808	814.444	Anchored	584	30
2013-05-20	Attom	NDR3	RSH9A	5	89.7488	12996.3	4716.36	10488.9	19379.7	97847.2	7.57024	3.48836	0.340659	3.49887	6.20177	4.94072	0.132096	3.48836	0.706043	3665.04	53.4565	799.813	52.2655	2004.7	82.9225	78.1772	60.1031	1121.96	2812.96	Anchored	532	44
2013-05-20	Attom	NDR3	RSH9A	7	59.4687	3494.04	1777.45	4073.48	19595.9	19877.5	5.44524	3.96754	0.502617	3.82469	12.7212	5.51087	0.183647	3.96754	0.719949	4248.24	56.3549	1086.87	78.8807	2659.23	98.7909	74.4161	59.1285	1473.57	3082.49	Anchored	512	70
2013-05-20	Attom	NDR3	RSH9A	8	88.4573	62978.7	4929.91	3289.15	43007.9	729962	11.4395	2.44528	0.0768033	2.17342	0.925293	3.27157	0.0874165	2.44528	0.747433	1115.19	43.3814	540.24	25.2942	665.155	31.4382	51.5562	18.7799	93.4772	549.655	Anchored	528	25
2013-05-20	Attom	NDR3	RSH9A	9	72.3975	3253.32	904.172	1702.6	1491.72	22184	6.61603	3.9989	0.267404	5.17058	5.57027	6.53652	0.151148	3.9989	0.611778	3290.16	81.1822	907.396	67.3426	1911.51	106.727	72.4209	52.53	897.391	2315.42	Anchored	688	61
2013-05-20	Attom	NDR3	RSH9A	11	-3.1603	6149.14	555.284	243.804	7.82571	62501.3	10.2344	2.88318	0.0875906	5.86785	1.1795	6.53792	0.0977092	2.88318	0.440993	1372.66	112.882	600.97	33.0032	791.082	69.424	56.2184	24.0319	120.688	738.682	Anchored	581	33
2013-05-20	Attom	NDR3	RSH9A	14	-98.9035	2226.82	769.151	1578.57	7680.69	13143.1	6.10259	4.3371	0.345587	3.65817	7.80457	5.67386	0.163865	4.3371	0.7644	3686.97	55.8071	978.219	78.2514	2208.73	97.3196	73.4682	55.7113	1133.2	2630.5	Anchored	650	63
2013-05-20	Attom	NDR3	RSH9A	16	-99.9968	72968.1	5076.81	978.531	1180.42	794314	10.9188	2.89528	0.0671152	2.32206	0.847134	3.71142	0.0915853	2.89528	0.780101	840.413	48.3417	564.906	31.2431	623.075	33.991	32.7823	9.3358	24.178	244.264	Anchored	559	31
2013-05-20	Attom	NDR3	RSH9A	17	20.6993	15103.6	1188.76	443.111	9440.46	158210	10.1471	2.82242	0.0739151	3.45696	1.00391	4.4628	0.0985499	2.82242	0.632432	1038.24	69.799	605.905	32.5618	705.794	44.4172	41.6413	14.1527	55.4713	399.775	Anchored	596	32
2013-05-20	Attom	NDR3	RSH9A	18	-72.6279	15074.5	1070.19	224.232	11.2052	172510	11.0974	2.77671	0.0659904	2.54689	0.819529	3.76786	0.090111	2.77671	0.736947	805.128	53.3209	556.193	29.5251	607.785	33.8916	30.9186	8.48852	17.7004	219.41	Weighted mean of 2	553	21
2013-05-20	Attom	NDR3	RSH9A	19	-83.6986	10000.5	849.703	475.997	485.401	104982	10.4869	2.60183	0.0831124	3.45836	1.09226	4.32779	0.095357	2.60183	0.601192	1270.98	67.4856	587.141	29.1368	749.599	44.8749	53.804	21.6726	117.583	654.701	Anchored	570	29
2013-05-20	Attom	NDR3	RSH9A	20	2.14632	14181.9	3743.39	7012.95	8311.86	112546	7.97418	2.81962	0.254221	4.23801	4.39371	5.09029	0.125405	2.81962	0.553921	3210.54	66.9566	761.597	40.3815	1711.16	80.8967	76.2782	55.4923	868.664	2408.56	Anchored	586	38
2013-05-20	Attom	NDR3	RSH9A	21	-55.79	7400.5	500.883	75.9641	-0.856165	80899.4	10.753	2.73369	0.0652881	3.14075	0.83678	4.16382	0.0929975	2.73369	0.656534	782.689	65.9908	573.24	29.9186	617.367	37.809	26.7601	7.14756	6.31767	179.53	Anchored	569	30
2013-05-20	Attom	NDR3	RSH9A	22	-197.336	3554.46	301.471	217.413	435.534	34852.2	9.68226	3.18392	0.0836109	4.64972	1.19012	5.63536	0.103282	3.18392	0.56499	1282.64	90.5834	633.612	38.3139	796.018	60.3577	50.6009	20.4022	102.048	610.712	Anchored	616	38
2013-05-20	Attom	NDR3	RSH9A	24	86.032	12650.1	2954.82	5118.14	8529.38	121809	9.53959	3.27682	0.237288	4.40441	3.42809	5.48966	0.104826	3.27682	0.596907	3101.15	70.2034	642.631	39.9604	1510.86	82.8335	79.2777	57.4658	785.393	2418.56	Anchored	505	36
2013-05-20	Attom	NDR3	RSH9A	25	-62.5817	9031.93	820.956	467.418	7297.81	86880.8	9.41017	2.74037	0.0894062	3.27682	1.30941	4.27167	0.106268	2.74037	0.641521	1412.02	62.6967	651.037	33.85	849.868	48.0308	53.893	23.3955	150.8	727.128	Anchored	629	33
2013-05-20	Attom	NDR3	RSH9A	26	-144.138	2647.27	796.164	1626.23	4263.18	20269.7	7.19548	5.0593	0.280221	6.49081	5.36719	8.22965	0.138976	5.0593	0.614765	3363.46	101.341	838.871	79.1038	1879.63	131.923	75.0593	55.3705	908.84	2445.48	Anchored	621	71
2013-05-20	Attom	NDR3	RSH9A	27	77.3826	7124.21	2742.84	5432.46	6157.49	51167.9	4.91532	9.33876	0.38037	5.18485	10.665	10.6815	0.203446	9.33876	0.87429	3832.56	78.3381	1193.8	200.397	2494.38	181.156	68.851	52.1403	1119.42	2438.36	Anchored	750	150
2013-05-20	Attom	NDR3	RSH9A	28	128.598	37221.7	2703.17	767.91	25.5862	439635	11.5375	3.14712	0.071622	3.52278	0.855538	4.7238	0.0866736	3.14712	0.666226	974.303	71.8234	535.834	32.2821	627.684	43.2942	45.0034	14.6332	48.5559	406.187	Regressed duplicates	549	23
2013-05-20	Attom	NDR3	RSH9A	31	-109.347	9308.07	639.501	197.066	554.578	88238.4	9.39534	2.7156	0.0671657	2.24982	0.985238	3.52649	0.106436	2.7156	0.770056	841.981	46.8262	652.015	33.5925	696.288	34.9333	22.5618	6.3584	9.33945	156.374	Anchored	647	34
2013-05-20	Attom	NDR3	RSH9A	34	-92.9019	10093.7	1181.62	1447.67	13138	90630	8.98463	2.79845	0.113952	2.8131	1.74794	3.96798	0.111301	2.79845	0.705259	1862.55	50.7908	680.301	36.0346	1026.4	50.0047	63.4748	33.7198	296.096	1146.22	Anchored	638	35
2013-05-20	Attom	NDR3	RSH9A	37	-154.018	13495.5	934.914	168.039	3707.24	144973	10.6593	2.62464	0.0667908	2.65211	0.863561	3.73128	0.0938146	2.62464	0.703416	830.319	55.3014	578.058	28.958	632.065	34.5194	30.3812	8.54454	19.4876	223.303	Anchored	573	29
2013-05-20	Attom	NDR3	RSH9A	38	81.0591	7861.62	1800.1	3139.57	6042.14	69005.4	8.71978	3.69932	0.2287	4.36249	3.61466	5.71981	0.114682	3.69932	0.646756	3042.25	69.8762	699.881	48.884	1552.76	87.1368	76.9947	54.9267	765.745	2293.49	Anchored	559	43
2013-05-20	Attom	NDR3	RSH9A	39	193.093	11672.7	1030.06	779.964	6710.3	123067	10.4373	2.85543	0.088241	4.06867	1.16517	4.97067	0.0958104	2.85543	0.574455	1386.87	78.117	589.809	32.1081	784.382	52.9183	57.472	24.8059	141.654	764.956	Anchored	569	32
2013-05-20	Attom	NDR3	RSH9A	40	176.87	15584.5	3892.79	7842.62	15799	141255	8.58271	3.89844	0.238111	5.4742	3.82351	6.72047	0.116513	3.89844	0.580085	3106.67	87.2156	710.464	52.2384	1597.71	102.799	77.131	55.5323	784.443	2343.97	Anchored	559	48
2013-05-20	Attom	NDR3	RSH9A	42	3.09869	3241.38	1697.4	3697.89	8450.77	9215.03	2.63464	6.97649	0.509548	5.09622	26.6544	8.63961	0.379558	6.97649	0.807501	4268.41	75.0054	2074.22	242.839	3370.85	156.415	51.4053	38.4661	1140.22	1951.35	Anchored	1017	200
2013-05-20	Attom	NDR3	RSH9A	43	96.6401	10830.2	956.92	755.224	4983.07	111720	10.2933	2.93345	0.0850442	4.6344	1.13867	5.48478	0.0971509	2.93345	0.534835	1315.67	89.865	597.69	33.4027	771.877	57.6354	54.5715	22.5667	116.552	684.581	Anchored	580	33
2013-05-20	Attom	NDR3	RSH9A	44	151.416	7145.98	494.08	110.027	2.96143	78476.3	11.0058	2.91265	0.0667555	4.47603	0.835935	5.34026	0.0908614	2.91265	0.545413	829.217	93.3498	560.629	31.2029	616.9	48.2154	32.3905	9.12147	8.05493	237.385	Anchored	555	31
2013-05-20	Attom	NDR3	RSH9A	45	-31.2501	2492.9	194.142	59.7431	-1.34892	29550.3	11.3951	3.16095	0.0712869	4.85429	0.862176	5.79274	0.0877567	3.16095	0.545675	964.734	99.1163	542.256	32.7951	631.31	53.0546	43.7921	14.1062	35.9993	389.682	Regress duplicates	545	23
2013-05-20	Attom	NDR3	RSH9A	47	68.6734	5797.03	1145.49	2881.73	32338.2	49366.2	8.34058	2.76983	0.188269	2.40879	3.11091	3.67073	0.119896	2.76983	0.754574	2726.36	39.6737	729.963	38.1192	1435.39	54.8994	73.2257	49.1453	650.528	1958.27	Anchored	620	34
2013-05-20	Attom	NDR3	RSH9A	48	-59.0141	12467.1	922.547	299.643	236.398	119403	9.63385	2.92391	0.0720839	2.88842	1.0312	4.11001	0.103801	2.92391	0.711411	987.395	58.7719	636.644	35.3533	719.529	41.5131	35.5229	11.5194	41.3723	315.398	Anchored	628	35
2013-05-20	Attom	NDR3	RSH9A	49	-184.88	2226.12	249.558	225.151	924.018	24368.8	10.8141	3.68513	0.107694	3.93326	1.37248	5.38987	0.0924722	3.68513	0.683713	1759.94	71.914	570.141	40.0913	877.228	61.4243	67.6044	35.0065	245.662	1149.7	Anchored	537	38
2013-05-20	Attom	NDR3	RSH9A	50	92.6628	1396.27	554.502	1241.29	4491.76	9674.6	6.81477	4.46103	0.38556	3.60783	7.79734	5.73736	0.14674	4.46103	0.777541	3853.02	54.439	882.664	73.1812	2207.9	98.3478	77.0916	60.0225	1226.89	2897.17	Anchored	540	57
2013-05-20	Attom	NDR3	RSH9A	51.2	-57.6362	6046.92	423.264	105.448	195.57	68276.8	11.1339	2.43365	0.0692515	2.61703	0.857212	3.57372	0.0898159	2.43365	0.680985	905.314	53.9293	554.448	25.807	628.6	32.9564	38.7563	11.7963	41.1951	325.059	Regress 4	552	14
2013-05-20	Attom	NDR3	RSH9A	52	16.9544	23962.8	2911.79	3748.71	19167	267699	10.8894	2.97126	0.114844	5.44957	1.45349	6.20695	0.0918324	2.97126	0.4787	1876.63	98.226	566.365	32.14	911.316	72.0551	69.8201	37.852	272.896	1278.13	Anchored	528	31
2013-05-20	Attom	NDR3	RSH9A	54	-432.112	29681.2	2004.14	214.304	2186.23	316943	10.6902	2.50581	0.0644307	1.94174	0.830639	3.17009	0.0935436	2.50581	0.790456	754.85	40.9816	576.46	27.5769	613.967	28.7983	23.6325	6.1089	8.70827	150.813	Anchored	573	28
2013-05-20	Attom	NDR3	RSH9A	56	21.1925	4859.88	352.568	148.212	2028.89	55656.8	11.2546	2.90954	0.0701592	2.88673	0.859136	4.09861	0.0888528	2.90954	0.709884	932.092	59.2398	548.749	30.5383	629.651	37.7527	41.1272	12.8487	43.149	352.805	Regress 2	542	21
2013-05-20	Attom	NDR3	RSH9A	58	34.0827	3606.53	268.515	46.5945	36.156	38974.4	11.0348	3.91236	0.0764546	10.0599	0.954875	10.7939	0.0906227	3.91236	0.362462	1106.1	201.065	559.219	41.7774	680.638	101.792	49.4423	17.839	19.6271	505.104	Anchored	547	42
2013-05-20	Attom	NDR3	RSH9A	59	11.3304	22975.1	1505.68	185.138	5240.52	249063	10.7845	2.36455	0.0632197	1.70037	0.8079	2.91245	0.0927255	2.36455	0.811877	714.673	36.1225	571.636	25.8175	601.275	26.0921	20.0143	4.92934	3.54682	117.219	Anchored	569	26
2013-05-20	Attom	NDR3	RSH9A	61	-4.72798	2310.16	168.23	68.4697	-1.34409	25363	10.8739	3.3638	0.08127	7.44137	1.03003	8.16634	0.0919636	3.3638	0.41191	1227.1	146.123	567.14	36.4215	718.945	80.8412	53.782	21.115	70.9641	623.536	Pbc Anchored	552	36
2013-05-20	Attom	NDR3	RSH9A	62	-108.448	1264.24	121.385	109.629	125.219	12223.1	9.34523	4.51733	0.097562	7.34741	1.43879	8.625	0.107006	4.51733	0.523748	1577.19	137.506	655.339	56.0532	905.215	98.4072	58.449	27.604	151.469	865.801	Pbc Anchored	627	55
2013-05-20	Attom	NDR3	RSH9A	66	-137.812	1317.72	253.314	479.356	127.065	12152.2	9.4904	4.41388	0.189891	5.63857	2.75756	7.16071	0.10537	4.41388	0.616402	2740.48	92.7482	645.8	54.0201	1344.13	101.474	76.4347	51.9542	596.86	2040.66	Pbc Anchored	545	49
2013-05-20	Attom	NDR3	RSH9A	68.2	-140.653	6438.52	585.256	415.91	513.521	70843.8	10.8824	4.92684	0.0908185	7.75475	1.15015	9.18748	0.0918916	4.92684	0.536255	1441.94	147.77	566.715	53.2376	777.316	95.1974	60.6978	27.0934	115.404	821.989	Regress 3 proj	552	27
2013-05-20	Attom	NDR3	RSH9A	71.2	-21.6899	7078.26	507.338	234.999	1515.8	79174.9	11.1076	2.54075	0.068753	2.50008	0.853055	3.56452	0.0900284	2.54075	0.712788	890.411	51.6395	555.705	26.9986	626.325	32.7883	37.5901	11.2753	37.8315	307.707	Regress 3 Proj	539	18
2013-05-20	Attom	NDR3	RSH9A	77	75.0473	5276.66	399.049	78.4489	523.971	56892.4	10.5954	3.19487	0.0724805	2.99475	0.942778	4.37901	0.0943806	3.19487	0.729588	998.55	60.8318	581.392	35.426	674.335	42.2623	41.7763	13.7829	50.6806	381.731	Pbc Anchored	572	35
2013-05-20	Attom	NDR3	RSH9A	79	-94.5614	14448.8	911.566	29.8248	-1.04167	158631	10.9953	2.69192	0.0611847	2.08692	0.766906	3.40612	0.090948	2.69192	0.790319	644.768	44.8474	561.142	28.8687	577.987	29.5874	12.9699	2.91444	-12.7423	54.7573	Pbc Anchored	560	29
2013-05-20	Attom	NDR3	RSH9A	82	37.6004	15439	997.267	24.3423	-1.04167	129648	8.16541	2.67592	0.0609219	1.99394	1.02826	3.33712	0.122468	2.67592	0.801866	635.51	42.9153	744.752	37.5323	718.055	33.7882	-17.1897	-3.71797	-60.4853	-146.774	Pbc Anchored	748	38
2013-05-20	Attom	NDR3	RSH9A	83	39.4455	2981.05	518.946	841.091	2099.05	22741.7	7.5291	3.42066	0.161341	5.37267	2.9533	6.36918	0.132818	3.42066	0.537064	2469	90.7188	803.921	51.5014	1395.7	92.3002	67.4394	42.4	499.474	1613.58	Pbc Anchored	711	49
2013-05-20	Attom	NDR3	RSH9A	85	75.7346	2994.21	337.988	445.4	570.555	32728.7	10.9671	3.52052	0.113486	2.92206	1.42612	4.5752	0.0911816	3.52052	0.769477	1855.16	52.8054	562.521	37.8173	899.925	53.197	69.678	37.4924	284.207	1254.82	Anchoredected	525	36
Sample RSH010C - Wadi Kharit tributary, Egypt (aeolian sand)
2013-05-20	Attom	NDR3	RSH10C	6	-113.926	1346.19	94.4569	45.3558	-0.365497	14824.9	11.0376	3.5297	0.0794525	5.65297	0.992064	6.66445	0.0905995	3.5297	0.529631	1182.54	111.723	559.082	37.6943	699.773	65.2574	52.7221	20.1052	75.4335	585.767	Replicates scatter
2013-05-20	Attom	NDR3	RSH10C	6.2	-56.5949	2999.3	209.065	70.6941	105.039	26481.5	9.72543	3.5964	0.0731868	4.68785	1.03712	5.90847	0.102823	3.5964	0.608686	1018.22	94.9391	630.933	43.0873	722.484	59.3199	38.0357	12.6717	32.2312	344.199	Replicates scatter
2013-05-20	Attom	NDR3	RSH10C	6.3	-112.573	9605.04	666.39	164.516	1610.82	94722.1	10.0155	2.5013	0.0686479	3.11852	0.944631	3.9977	0.0998456	2.5013	0.625683	887.25	64.4453	613.504	29.2096	675.303	38.6897	30.8533	9.15133	23.1096	244.536	Replicates scatter
2013-05-20	Attom	NDR3	RSH10C	7	-9.43066	22740.2	1393.29	54.0777	35.8188	278831	12.2832	2.2603	0.0586538	2.03754	0.658098	3.04311	0.0814119	2.2603	0.74276	553.29	44.4631	504.545	21.9015	513.45	24.2362	8.81006	1.73434	-15.3313	26.8437	Duplicate
2013-05-20	Attom	NDR3	RSH10C	7.2	36.3087	21400.2	1297.68	6.1583	-1.95313	238883	11.0606	2.17664	0.058084	2.01061	0.723743	2.96316	0.090411	2.17664	0.734567	531.948	44.0347	557.968	23.2264	552.874	24.9562	-4.89129	-0.921297	-30.0498	-49.2456	Duplicate
2013-05-20	Attom	NDR3	RSH10C	7.3	-116.474	21397.8	1263.39	14.4669	-1.95313	248096	11.5066	2.66049	0.0574108	2.20915	0.687628	3.45812	0.0869069	2.66049	0.769347	506.359	48.5949	537.218	27.3684	531.375	28.2181	-6.09429	-1.0997	-34.0617	-58.2274	Duplicate
2013-05-20	Attom	NDR3	RSH10C	7.5	41.5201	26099.1	1643.81	95.9406	8.27416	305070	11.5041	2.17211	0.0609334	1.61387	0.729978	2.70603	0.0869258	2.17211	0.802691	635.917	34.7326	537.33	22.3576	556.541	22.9271	15.5031	3.45177	-3.71663	76.229	Duplicate
2013-05-20	Attom	NDR3	RSH10C	7.6	27.6437	24027.9	1488.45	178.067	5329.85	274196	11.4326	2.41116	0.0600077	1.87478	0.723382	3.05426	0.087469	2.41116	0.789443	602.88	40.5709	540.551	24.9558	552.661	25.7065	10.3385	2.19122	-13.5965	37.3732	Duplicate
2013-05-20	Attom	NDR3	RSH10C	14	101.722	1781.27	1464	2984.47	102.457	483.766	0.214614	10.4127	0.845094	3.42314	542.693	10.9609	4.65954	10.4127	0.949982	4999.06	48.5868	11173.8	1020.13	6395.27	200.924	-123.519	-74.7204	-4979.49	-7194.91	7/6 > 0.5
2013-05-20	Attom	NDR3	RSH10C	19	-172.528	78.0523	96.0184	200.81	56.6998	300.657	3.49796	15.1031	-0.0676371	635.158	-2.66487	635.338	0.285881	15.1031	0.0237717											Failed
2013-05-20	Attom	NDR3	RSH10C	21	8401.8	159735	131669	330375	836.369	23240.2	0.144067	2.11821	0.793406	1.19739	758.994	2.43322	6.94123	2.11821	0.870539	4909.3	17.0633	13357.4	234.394	6735.35	48.1863	-172.084	-98.318	-6670.25	-8682.5	7/6 > 0.5
2013-05-20	Attom	NDR3	RSH10C	26	243.748	5265.81	3001.77	6878.93	724.667	22848.4	4.23928	2.85913	0.548736	2.16399	17.8393	3.58574	0.235889	2.85913	0.797363	4377.13	31.6598	1365.29	69.9764	2981.11	66.7124	68.8086	54.2019	1549.11	2941.87	7/6 > 0.5
2013-05-20	Attom	NDR3	RSH10C	28	393.796	11051.4	7763.49	17756.6	48.4031	59506.1	5.28544	2.36523	0.672382	1.95943	17.5324	3.07143	0.189199	2.36523	0.770074	4672.15	28.2359	1117.03	48.3343	2964.43	57.357	76.0916	62.3188	1790.04	3506.78	7/6 > 0.5
2013-05-20	Attom	NDR3	RSH10C	33	-140.521	420.73	355.525	814.889	314.863	229.79	0.395107	10.637	0.853346	6.17775	297.658	12.3009	2.53096	10.637	0.864739	5012.85	87.6317	8132.6	914.91	5786.97	222.664	-62.2351	-40.533	-2568.3	-4034.66	7/6 > 0.5
2013-05-20	Attom	NDR3	RSH10C	35	2787.42	62208	46687.2	116492	209324	110024	1.77364	3.47615	0.702462	1.9521	54.5837	3.98677	0.563812	3.47615	0.871922	4735.12	28.0447	2882.36	159.592	4079.7	76.5462	39.1279	29.3486	1120.79	1693.16	7/6 > 0.5
2013-05-20	Attom	NDR3	RSH10C	39	36.3637	1833.04	1064.38	2474.08	1670.36	8337.01	4.57388	3.89075	0.548794	2.92046	16.536	4.86488	0.218633	3.89075	0.799764	4377.28	42.7267	1274.65	89.3738	2908.32	89.1314	70.8804	56.1723	1544.54	3013.26	7/6 > 0.5
2013-05-20	Attom	NDR3	RSH10C	9	121.876	1679.16	1103.09	2586.51	2359.39	5273.21	3.08213	3.38987	0.636273	3.41244	28.4511	4.80999	0.324451	3.38987	0.704757	4592.45	49.3686	1811.43	106.185	3434.77	90.2322	60.5563	47.2619	1533.1	2674.83	7/6 > 0.5
2013-05-20	Attom	NDR3	RSH10C	53	-35.5105	401.143	42.3648	5.70606	-0.776398	4404.57	10.4315	6.4813	0.121835	9.73249	1.60964	11.6931	0.0958633	6.4813	0.554284	1982.46	173.24	590.121	72.6869	973.968	136.82	70.233	39.4107	247.027	1319.66	206 counts < 1000
2013-05-20	Attom	NDR3	RSH10C	34	91.7744	724.988	211.182	373.28	79.6111	5400.5	7.47475	4.19677	0.277157	6.58814	5.11018	7.8113	0.133784	4.19677	0.537269	3346.29	102.995	809.415	63.5324	1837.8	124.689	75.8115	55.9573	903.695	2473.34	206 counts < 1000
2013-05-20	Attom	NDR3	RSH10C	1	15.5953	21891.2	1380.97	36.0299	-0.365497	233032	10.3986	2.37212	0.0612808	2.18158	0.812183	3.22277	0.0961664	2.37212	0.73605	648.14	46.8554	591.903	26.775	603.678	28.9163	8.67661	1.95049	-17.1416	29.4616	Conc within Unc	591.903	26.775
2013-05-20	Attom	NDR3	RSH10C	7.4	-64.1806	21819.2	1301.35	29.4223	-1.95313	256170	11.6238	2.39911	0.0575823	1.86097	0.682729	3.03627	0.0860306	2.39911	0.79015	512.919	40.8901	532.019	24.456	528.423	24.7138	-3.72384	-0.680575	-28.3101	-43.5563	Weighted mean of 6	534	19
2013-05-20	Attom	NDR3	RSH10C	8	-147.051	15027.9	958.116	14.3601	-0.365497	160661	10.4783	2.21112	0.061501	2.32895	0.808906	3.21139	0.0954355	2.21112	0.688523	655.837	49.9569	587.604	24.7884	601.84	28.7523	10.404	2.36548	-14.5159	43.4447	Conc within Unc	587.604	24.7884
2013-05-20	Attom	NDR3	RSH10C	11	-39.7797	29989.7	2002.99	43.1981	-0.365497	247281	8.18908	2.21947	0.0651803	1.87083	1.09695	2.90277	0.122114	2.21947	0.764604	779.217	39.3303	742.719	31.0655	751.875	30.3779	4.68393	1.21783	-21.2214	5.43253	Conc within Unc	742.719	31.0655
2013-05-20	Attom	NDR3	RSH10C	13	-16.5333	12656.2	791.907	10.9062	-0.365497	128736	10.0631	2.39816	0.0601206	2.23305	0.823379	3.27685	0.0993734	2.39816	0.731852	606.947	48.2912	610.736	27.8877	609.932	29.6135	-0.624252	-0.131813	-30.4175	-31.6766	Conc within Unc	610.736	27.8877
2013-05-20	Attom	NDR3	RSH10C	15	-152.572	8180.15	529.609	32.8519	-0.365497	84990.5	10.4287	2.33567	0.0630766	2.42642	0.833571	3.36791	0.095889	2.33567	0.693506	709.857	51.5871	590.272	26.2951	615.592	30.6266	16.8464	4.11312	-5.30661	93.2899	Conc within Unc	590.3	26.3
2013-05-20	Attom	NDR3	RSH10C	20	-131.403	30322.5	1901.83	21.0715	-0.365497	318164	10.5286	2.27524	0.0601334	1.58763	0.787138	2.7744	0.0949794	2.27524	0.820084	607.404	34.3309	584.919	25.3947	589.547	24.5171	3.70193	0.785044	-19.8889	-2.90904	Conc within Unc	584.919	25.3947
2013-05-20	Attom	NDR3	RSH10C	25	156.11	21147.9	1319.46	114.186	1.69339	212712	9.85635	2.62037	0.0608494	1.88094	0.850837	3.22556	0.101457	2.62037	0.812376	632.946	40.5004	622.945	31.0442	625.108	29.6744	1.58011	0.346111	-27.5109	-21.043	Conc within Unc	622.945	31.0442
2013-05-20	Attom	NDR3	RSH10C	31	-56.9053	10310.1	703.581	89.7942	20.212	110073	10.5918	2.40709	0.0629083	1.93938	0.818551	3.09116	0.094413	2.40709	0.7787	704.176	41.2707	581.583	26.7172	607.24	27.8694	17.4094	4.22508	-2.21307	95.8756	Conc within Unc	581.583	26.7172
2013-05-20	Attom	NDR3	RSH10C	36	-134.42	16425.3	1056.95	58.5035	-2.93624	172421	10.2583	2.54916	0.0611919	2.39469	0.8221	3.49753	0.0974821	2.54916	0.728844	645.018	51.4592	599.636	29.1266	609.219	31.5507	7.03584	1.57301	-21.9677	16.2558	Conc within Unc	599.636	29.1266
2013-05-20	Attom	NDR3	RSH10C	37	1.86425	13188	848.019	83.5037	-2.93624	141103	10.5443	2.43315	0.0618154	2.09611	0.807949	3.21153	0.0948378	2.43315	0.757632	666.764	44.8811	584.085	27.1166	601.303	28.7349	12.4001	2.86337	-11.5174	55.5626	Conc within Unc	584.085	27.1166
2013-05-20	Attom	NDR3	RSH10C	44	-59.011	11441.2	705.481	63.7467	-0.776398	122258	10.3084	2.28899	0.0596403	2.04027	0.797361	3.0663	0.0970084	2.28899	0.7465	589.574	44.2509	596.853	26.0444	595.339	27.2554	-1.23464	-0.254333	-28.7695	-33.3235	Conc within Unc	596.853	26.0444
2013-05-20	Attom	NDR3	RSH10C	47	87.0947	55742.9	3531.49	291.473	1129.54	596186	10.4704	2.41396	0.0606104	1.68929	0.797791	2.94633	0.0955072	2.41396	0.819309	624.467	36.4251	588.025	27.0761	595.582	26.2104	5.8357	1.26877	-18.6539	9.36596	Conc within Unc	588.025	27.0761
2013-05-20	Attom	NDR3	RSH10C	50	-159.635	21881.8	1419.78	282.659	897.822	234597	10.6411	2.34813	0.0619106	1.69981	0.801833	2.89881	0.0939751	2.34813	0.810034	670.06	36.376	579.004	25.9539	597.862	25.8646	13.5893	3.15431	-7.00619	65.1028	Conc within Unc	579.004	25.9539
2013-05-20	Attom	NDR3	RSH10C	51	-21.6811	12201.8	818.375	14.0742	-0.776398	126823	10.1329	2.42283	0.0641702	2.24208	0.872785	3.30106	0.0986889	2.42283	0.733954	746.294	47.3861	606.721	27.9976	637.078	30.7706	18.7023	4.76519	-0.412635	111.576	Conc within Unc	606.721	27.9976
2013-05-20	Attom	NDR3	RSH10C	52	28.9706	7268.33	467.164	8.06456	-0.776398	73137.4	10.0978	2.47743	0.0629028	2.48227	0.858513	3.50704	0.099031	2.47743	0.706417	703.988	52.8252	608.728	28.7173	629.311	32.3772	13.5316	3.27074	-11.7941	66.5433	Conc within Unc	608.728	28.7173
2013-05-20	Attom	NDR3	RSH10C	54	-143.636	95418.3	5867.55	26.705	-0.776398	945414	9.84153	2.36182	0.0595408	1.66422	0.833793	2.88926	0.10161	2.36182	0.817448	585.953	36.1168	623.839	28.0259	615.715	26.3336	-6.46566	-1.31943	-34.4575	-65.9116	Conc within Unc	623.839	28.0259
2013-05-20	Attom	NDR3	RSH10C	55	-37.0136	24553	1614.84	21.9535	-0.776398	257546	10.2925	2.3002	0.0611736	1.88778	0.81912	2.97567	0.0971577	2.3002	0.773001	644.378	40.5706	597.731	26.2083	607.557	26.852	7.23919	1.61744	-17.0251	20.4395	Conc within Unc	597.731	26.2083
2013-05-20	Attom	NDR3	RSH10C	56	-66.3319	55475.6	3482.41	84.9093	121.151	577189	10.3085	2.43754	0.0608313	1.65098	0.813272	2.94403	0.0970069	2.43754	0.827959	632.306	35.5527	596.844	27.7306	604.288	26.4669	5.60836	1.23179	-19.0233	7.73143	Conc within Unc	596.844	27.7306
2013-05-20	Attom	NDR3	RSH10C	57	22.8623	8116.34	521.283	-11.6724	-0.776398	86416.9	10.3837	2.63999	0.0617123	2.63353	0.819079	3.72894	0.0963048	2.63999	0.707973	663.19	56.4215	592.717	29.8306	607.534	33.5373	10.6263	2.43889	-18.7202	40.6423	Conc within Unc	592.717	29.8306
2013-05-20	Attom	NDR3	RSH10C	59	9.02583	15907.9	973.869	14.8828	-0.776398	164450	10.0339	2.39316	0.0593896	2.0719	0.815731	3.16543	0.0996621	2.39316	0.756028	580.433	45.0061	612.429	27.9029	605.664	28.4764	-5.51242	-1.11691	-35.2411	-59.8988	Conc within Unc	612.429	27.9029
2013-05-20	Attom	NDR3	RSH10C	2	67.4684	13664.1	939.769	278.617	-0.365497	148294	10.6334	2.24404	0.0665487	2.18555	0.862532	3.13247	0.0940437	2.24404	0.716381	822.744	45.6277	579.408	24.8221	631.504	29.0398	29.5762	8.24961	23.0568	218.514	Anchored	591	27
2013-05-20	Attom	NDR3	RSH10C	3	-185.162	1979.4	140.796	62.097	-0.365497	20220	10.0908	3.58842	0.0695048	4.34203	0.949279	5.63294	0.0990999	3.58842	0.637042	912.832	89.3718	609.132	41.5801	677.727	54.2332	33.2701	10.1214	14.362	262.12	Anchored	602	42
2013-05-20	Attom	NDR3	RSH10C	4	-27.7287	2511.81	205.608	119.132	-0.365497	23984.2	9.54287	3.05054	0.0823393	4.35561	1.18914	5.31763	0.10479	3.05054	0.573666	1252.72	85.2158	642.421	37.1974	795.563	57.0276	48.7178	19.2495	96.1143	573.1	Anchored	626	37
2013-05-20	Attom	NDR3	RSH10C	5	-71.5416	3746.39	257.855	52.9204	-0.365497	42076	11.0042	2.61933	0.0661219	4.3805	0.82812	5.10389	0.0908745	2.61933	0.513203	809.296	91.6478	560.707	28.0711	612.569	45.8983	30.7167	8.46626	5.96335	220.518	Anchored	556	28
2013-05-20	Attom	NDR3	RSH10C	10	-19.6171	975.429	200.984	344.352	926.19	8923	8.63286	4.36302	0.186861	6.43662	2.98312	7.77599	0.115836	4.36302	0.561089	2713.99	106.136	706.555	58.1328	1403.33	111.871	73.9662	49.6514	584.9	1949.3	Anchored	600	54
2013-05-20	Attom	NDR3	RSH10C	12	5.62992	2678.14	776.326	1609.81	24051.6	23497.3	8.61434	3.13947	0.280316	3.78529	4.48469	4.91779	0.116086	3.13947	0.63839	3363.99	59.0976	707.993	41.9634	1728.14	78.5426	78.9538	59.0315	941.605	2614.03	Anchored	521	37
2013-05-20	Attom	NDR3	RSH10C	16	-14.314	8555.25	576.979	110.907	-0.365497	97510	11.2164	2.5044	0.0646712	2.40764	0.794624	3.47401	0.0891549	2.5044	0.720896	762.708	50.7502	550.537	26.3766	593.791	30.7668	27.8181	7.28445	12.4876	185.795	Anchored	546	26
2013-05-20	Attom	NDR3	RSH10C	17	96.2426	21639.7	1438.78	79.2617	-0.365497	228525	10.5003	2.13634	0.0652618	2.4674	0.856571	3.26374	0.0952354	2.13634	0.654569	781.844	51.8498	586.426	23.9059	628.249	30.1279	24.9945	6.65718	11.6958	171.513	Anchored	582	24
2013-05-20	Attom	NDR3	RSH10C	18	15.7281	47427.1	3276.93	763.545	42703.4	512430	10.3016	2.28792	0.0647421	1.70171	0.866143	2.85138	0.0970728	2.28792	0.802389	765.017	35.8567	597.231	26.0479	633.471	26.5262	21.9323	5.72082	9.71352	141.738	Anchored	594	26
2013-05-20	Attom	NDR3	RSH10C	22	42.3654	12761.6	990.716	315.243	41.7067	130629	10.3454	2.68572	0.0758479	3.44053	1.01042	4.36467	0.0966617	2.68572	0.615331	1090.16	68.9286	594.816	30.4484	709.089	43.5984	45.4376	16.1155	70.6747	464.893	Anchored	583	30
2013-05-20	Attom	NDR3	RSH10C	23	-262.168	7802.07	955.834	1279.03	181.332	65470.8	8.17811	3.27296	0.12127	3.10385	2.04365	4.51067	0.122278	3.27296	0.725604	1974.19	55.3023	743.66	45.8133	1130.18	59.7145	62.3309	34.1998	326.804	1184.72	Anchored	692	44
2013-05-20	Attom	NDR3	RSH10C	24	43.4769	14637.8	998.618	200.201	1795.39	160839	10.9668	2.66079	0.0652592	2.2946	0.8201	3.51354	0.0911841	2.66079	0.757295	781.758	48.2192	562.536	28.6033	608.104	31.6512	28.0421	7.49341	13.9166	190.618	Anchored	558	28
2013-05-20	Attom	NDR3	RSH10C	27	130.342	62836.4	4306.86	649.148	1862.42	571023	8.91519	2.13319	0.064665	1.54614	0.999642	2.63458	0.112168	2.13319	0.809686	762.507	32.5919	685.327	27.6785	703.628	26.4001	10.1219	2.60097	-8.09901	49.5016	Anchored	683	28
2013-05-20	Attom	NDR3	RSH10C	29	-107.548	6493.05	476.787	236.485	1716.98	64244	9.95045	2.41354	0.072597	3.11678	1.0055	3.94202	0.100498	2.41354	0.61226	1001.81	63.2792	617.326	28.3541	706.598	39.3634	38.379	12.634	49.9084	356.131	Anchored	608	28
2013-05-20	Attom	NDR3	RSH10C	30	47.9811	11312.5	950.89	656.244	315.25	115974	9.92861	2.71327	0.077654	3.25224	1.07791	4.23544	0.100719	2.71327	0.640612	1137.14	64.7045	618.622	31.9302	742.612	43.6658	45.5984	16.6965	80.3242	486.587	Anchored	606	32
2013-05-20	Attom	NDR3	RSH10C	32	-73.1298	11714.9	911.487	306.394	70.814	100128	8.41552	2.37302	0.0758765	2.71651	1.2426	3.60703	0.118828	2.37302	0.657887	1090.91	54.4173	723.815	32.4125	820.061	39.797	33.6506	11.7365	56.4493	334.686	Anchored	713	32
2013-05-20	Attom	NDR3	RSH10C	38	-138.347	12538	813.717	94.7677	-2.93624	137405	11.0142	2.73962	0.064305	2.36813	0.804635	3.62126	0.0907921	2.73962	0.756536	750.728	50.0143	560.22	29.3329	599.44	32.2708	25.3764	6.54271	6.94878	161.175	Anchored	557	29
2013-05-20	Attom	NDR3	RSH10C	40	31.4969	20523.8	1424.23	210.542	9.56377	214264	9.91303	2.27761	0.0657021	2.50103	0.913438	3.3827	0.100877	2.27761	0.673311	795.957	52.4377	619.549	26.852	658.884	32.2751	22.1631	5.96996	7.06002	149.556	Anchored	616	27
2013-05-20	Attom	NDR3	RSH10C	41	-171.415	6053.62	427.032	66.3276	45.8338	59784.6	9.76254	3.04765	0.06703	3.23909	0.946264	4.44745	0.102432	3.04765	0.685256	837.77	67.4611	628.648	36.4058	676.155	42.9889	24.9618	7.02618	4.51903	172.716	Anchored	624	36
2013-05-20	Attom	NDR3	RSH10C	42	-31.6704	6064.14	413.056	59.789	-0.776398	60879.7	9.91822	2.49586	0.0653311	2.47366	0.907804	3.51402	0.100825	2.49586	0.710259	784.072	51.9628	619.239	29.4054	655.889	33.401	21.0226	5.58788	3.24929	135.427	Anchored	616	29
2013-05-20	Attom	NDR3	RSH10C	43	117.984	4282.12	300.69	70.565	-0.776398	45868.8	10.5327	2.59279	0.0679569	3.97954	0.889205	4.74966	0.0949428	2.59279	0.545889	866.308	82.5096	584.703	28.9209	645.942	44.4132	32.5063	9.48048	16.8252	252.684	Anchored	579	29
2013-05-20	Attom	NDR3	RSH10C	45	-49.6852	7935.94	579.977	66.0194	70.6523	66450.3	8.28428	2.57951	0.0698852	2.42391	1.16262	3.53967	0.120711	2.57951	0.728745	924.059	49.8042	734.652	35.7218	783.184	37.9265	20.4973	6.19678	10.6057	153.685	Anchored	729	36
2013-05-20	Attom	NDR3	RSH10C	46	22.4077	2877.06	480.945	811.957	1427.22	28580.5	9.65085	2.7687	0.163382	2.62907	2.33316	3.81808	0.103618	2.7687	0.725155	2490.2	44.2982	635.576	33.4282	1222.44	52.8733	74.477	48.0076	533.991	1821.2	Anchored	557	30
2013-05-20	Attom	NDR3	RSH10C	48	37.7253	5000.95	1725.72	3685.57	1152.15	37452	7.35325	2.91163	0.333455	2.21385	6.24976	3.65769	0.135994	2.91163	0.796029	3632.35	33.8998	821.971	44.7836	2011.44	62.0954	77.3708	59.1352	1127.38	2765.59	Anchored	554	36
2013-05-20	Attom	NDR3	RSH10C	49	-1.54524	5438.33	448.433	290.62	1462.3	55054.2	10.2426	2.45294	0.0787025	3.8432	1.05898	4.55929	0.0976318	2.45294	0.53801	1163.77	76.1636	600.515	28.0688	733.318	46.5373	48.3992	18.1098	86.2654	535.187	Anchored	587	28
2013-05-20	Attom	NDR3	RSH10C	58	-73.1781	10236.2	762.546	249.733	373.218	104773	10.1222	2.4675	0.0735368	2.3298	1.00123	3.3936	0.0987923	2.4675	0.727103	1027.87	47.1146	607.327	28.5398	704.434	33.9067	40.9142	13.785	63.1997	392.006	Anchored	597	28
2013-05-20	Attom	NDR3	RSH10C	60	-8.0773	4584.73	496.75	502.284	1283.73	47575.8	10.2562	2.58772	0.107944	2.66622	1.4505	3.71552	0.0975017	2.58772	0.696464	1764.18	48.7223	599.751	29.5717	910.079	43.708	66.0039	34.0989	266.619	1134.86	Anchored	565	28
Sample SD02A - White Nile, Esh Shawal, Sudan (modern river sand)
2013-09-17	Attom	NDR4	SD02A	30	136	8	2	6	-1				-0.0595746	57.6846																Failed
2013-09-17	Attom	NDR4	SD02A	62	-61	2072	-63	269	6308	19760	11.3487	4.1699	-0.0307567	3.7858	-0.373508	5.63208	0.0881161	4.1699	0.740383			544.386	43.3902	-474.813	-70.5866		214.653	-948.613	-500.996	Failed
2013-09-17	Attom	NDR4	SD02A	63	-286	64012	-63	280	3603	663421	11.752	3.06339	-0.000953501	3.3674	-0.0111819	4.55233	0.0850921	3.06339	0.672928			526.446	30.8981	-11.4179	-1.04597		4710.71	-536.818	-495.547	Failed
2013-09-17	Attom	NDR4	SD02A	64	32	4149	-63	2062	5857	31940	8.76539	4.56987	-0.0145299	3.91472	-0.228454	6.01736	0.114085	4.56987	0.759446			696.429	60.0534	-263.349	-36.8433		364.451	-922.934	-636.375	Failed
2013-09-17	Attom	NDR4	SD02A	65	-111	10971	-63	27	8	110957	11.6304	2.96	-0.00573472	3.16775	-0.0679556	4.33546	0.0859819	2.96	0.682741			531.729	30.1445	-71.4574	-6.43961		844.121	-596.747	-501.585	Failed
2013-09-17	Attom	NDR4	SD02A	66	57	7277	-63	41	-1	73165	11.5335	3.2108	-0.00854737	3.66635	-0.102135	4.87354	0.0867037	3.2108	0.658823			536.013	32.9441	-109.393	-11.3211		589.987	-634.085	-503.069	Failed
2013-09-17	Attom	NDR4	SD02A	67	-74	13389	-63	36	-1	134830	11.5895	3.30769	-0.00464538	3.30562	-0.0552411	4.67631	0.0862849	3.30769	0.707329			533.528	33.7851	-57.6996	-5.56794		1024.66	-585.66	-499.743	Failed
2013-09-17	Attom	NDR4	SD02A	68	-40	4131	-63	1	-1	39950	11.0269	3.91913	-0.0149548	3.90283	-0.186911	5.53098	0.0906877	3.91913	0.708579			559.603	41.8769	-210.098	-26.1542		366.353	-743.547	-517.726	Failed
2013-09-17	Attom	NDR4	SD02A	69	-15	14386	-63	224	10	155308	12.121	3.27038	-0.00430967	3.06597	-0.0490016	4.48281	0.0825012	3.27038	0.729538			511.035	32.0552	-51.0158	-4.7016		1101.72	-557.349	-478.98	Failed
2013-09-17	Attom	NDR4	SD02A	70	77802	1472462	-63	3190997	1167798	140680	0.10728	2.56402	-4.13757e-05	2.98861	-0.0531536	3.93777	9.32139	2.56402	0.651136			15047.3	291.84	-55.4586	-4.49909		27232.6	-15098.3	-14755.5	Failed
2013-09-17	Attom	NDR4	SD02A	71	-57	6445	-63	1694	-1	57311	10.2326	3.70074	-0.00975781	4.13839	-0.131424	5.55173	0.097727	3.70074	0.666592			601.075	42.338	-143.067	-17.2039		520.135	-726.938	-558.737	Failed
2013-09-17	Attom	NDR4	SD02A	72	177	50350	-63	30	-1	503003	11.766	2.99655	-0.00123084	3.05618	-0.0144171	4.28013	0.0849905	2.99655	0.700107			525.842	30.1924	-14.7455	-1.27226		3666.13	-539.315	-495.65	Failed
2013-09-17	Attom	NDR4	SD02A	73	29	202685	-63	1495	25	1961431	11.123	2.50068	-0.000302902	2.52499	-0.00375306	3.55372	0.0899035	2.50068	0.703678			554.966	26.5399	-3.81796	-0.271907		14635.7	-558.512	-528.427	Failed
2013-09-17	Attom	NDR4	SD02A	74	8099	145192	-63	312858	92416	12889	0.100011	4.33481	-0.000430366	5.35458	-0.593056	6.88928	9.99889	4.33481	0.629211			15457.2	489.039	-912.909	-227.592		1793.18	-16142.5	-14968.1	Failed
2013-09-17	Attom	NDR4	SD02A	75	112	13615	-63	11345	2238	88592	7.56084	3.65894	-0.00451559	3.41589	-0.0823097	5.00562	0.132261	3.65894	0.730968			800.748	54.8704	-87.2166	-9.15861		1018.11	-878.806	-745.878	Failed
2013-09-17	Attom	NDR4	SD02A	21	196	1835	1414	3445	1827	2413	1.45648	3.7379	0.740597	2.77635	70.0785	4.65618	0.686589	3.7379	0.802782	4811.57	39.7423	3369.59	193.258	4329.37	89.1912	29.969	22.1691	870.591	1635.24	7/6 > 0.5
2013-09-17	Attom	NDR4	SD02A	22	16431	312358	271702	698311	268518	6732	0.0250869	2.68083	0.853603	1.849	4689.37	3.25663	39.8614	2.68083	0.823192	5013.92	26.2269	23917.4	328.654	8583.3	64.0567	-377.02	-178.65	-15398.1	-18574.8	7/6 > 0.5
2013-09-17	Attom	NDR4	SD02A	24	40588	739212	667747	1670879	950231	9895	0.0151721	3.08617	0.878871	2.11587	7983.36	3.74184	65.9105	3.08617	0.824774	5055.26	29.9586	27096.6	380.495	9123.46	73.2701	-436.008	-196.999	-18046.4	-21660.8	7/6 > 0.5
2013-09-17	Attom	NDR4	SD02A	39	19533	355758	317057	806727	363688	5956	0.0187754	2.71631	0.874366	1.84359	6418.14	3.28286	53.2611	2.71631	0.827422	5047.98	26.1116	25745.7	334.903	8901.9	64.5602	-410.021	-189.216	-16908.4	-20362.9	7/6 > 0.5
2013-09-17	Attom	NDR4	SD02A	44	88113	1604903	1370746	3458185	949916	68475	0.0485991	2.45424	0.833647	2.07423	2364.07	3.21337	20.5765	2.45424	0.763759	4980.34	29.4652	19800.8	294.906	7888.07	63.2189	-297.58	-151.023	-11976	-14525.6	7/6 > 0.5
2013-09-17	Attom	NDR4	SD02A	32	75	685	613	1471	166	168	0.273913	6.66586	0.875463	3.7044	440.485	7.62603	3.65079	6.66586	0.874094	5049.76	52.463	9908.38	641.612	6183.83	143.831	-96.215	-60.2305	-3868.38	-4217.01	7/6 > 0.5
2013-09-17	Attom	NDR4	SD02A	56	45134	843365	724747	1784019	425741	20057	0.027692	2.80893	0.838813	1.79227	4174.62	3.33202	36.1115	2.80893	0.843013	4989.11	25.4499	23296.9	343.098	8465.27	65.4911	-366.955	-175.205	-14897.1	-17964.7	7/6 > 0.5
2013-09-17	Attom	NDR4	SD02A	61	83618	1497772	1094873	122784200	1039643	62541	0.0472706	2.88562	0.717135	3.88683	2090.81	4.84089	21.1548	2.88562	0.596092	4765.44	55.7592	19971.3	345.802	7763.4	93.7918	-319.087	-157.25	-12301.7	-14860.1	7/6 > 0.5
2013-09-17	Attom	NDR4	SD02A	28	-68	10	10	32	-1	1	401.896	100.02	0.140045	35.5436	0.0480242	106.148	0.00248821	100.02	0.942271	2227.77	615.473	16.0201	31.9276	47.6283	94.2637	99.2809	66.3643	-62.6555	2243.67	206 counts < 1000
2013-09-17	Attom	NDR4	SD02A	1	-151	10555	650	13	-2	104239	11.3494	2.8191	0.0599611	2.27606	0.728122	3.62323	0.0881107	2.8191	0.778064	602.169	49.2607	544.354	29.3647	555.45	30.5378	9.60121	1.99769	-19.4417	87.1802	Conc within Unc	544.354	29.3647
2013-09-17	Attom	NDR4	SD02A	3	126	932382	56841	67	-2	9335420	11.6122	2.63488	0.0598731	2.06069	0.710597	3.345	0.0861164	2.63488	0.787707	598.991	44.6232	532.528	26.879	545.101	27.8334	11.0959	2.30653	-15.2605	93.3424	Conc within Unc	532.528	26.879
2013-09-17	Attom	NDR4	SD02A	5	-26	8097	501	0	-2	83597	11.8292	3.05911	0.0591401	2.46779	0.689024	3.93041	0.0845368	3.05911	0.778317	572.259	53.6796	523.146	30.6698	532.214	32.0497	8.58231	1.70381	-22.9818	79.7828	Conc within Unc	523.146	30.6698
2013-09-17	Attom	NDR4	SD02A	6	-2	53900	3275	80	238	517595	11.0805	2.72236	0.0600218	2.12102	0.746544	3.45108	0.0902486	2.72236	0.788842	604.36	45.8882	557.007	28.9889	566.217	29.5231	7.83514	1.62655	-20.3133	76.3413	Conc within Unc	557.007	28.9889
2013-09-17	Attom	NDR4	SD02A	8	-74	9406	599	3	-2	97781	11.912	2.53857	0.0613076	2.34486	0.709311	3.45582	0.0839492	2.53857	0.734578	650.042	50.3464	519.652	25.2984	544.337	28.7125	20.0587	4.53484	-4.02773	155.689	Conc within Unc	519.652	25.2984
2013-09-17	Attom	NDR4	SD02A	10	88	34900	2163	-2	-2	354127	11.5614	2.78356	0.0605712	2.36057	0.722038	3.64973	0.0864944	2.78356	0.762677	624.041	50.9032	534.771	28.5069	551.869	30.6108	14.3052	3.09824	-13.5126	117.777	Conc within Unc	534.771	28.5069
2013-09-17	Attom	NDR4	SD02A	11	-173	38878	2450	82	31	378598	11.1842	2.49677	0.0609937	2.10716	0.751596	3.26711	0.0894116	2.49677	0.764214	639.012	45.3257	552.056	26.3657	569.15	28.0773	13.6078	3.00342	-10.9833	113.321	Conc within Unc	552.056	26.3657
2013-09-17	Attom	NDR4	SD02A	12	-140	44502	2714	26	-2	439206	11.2926	2.59831	0.0594639	2.12377	0.725715	3.35583	0.0885536	2.59831	0.774266	584.124	46.1042	546.977	27.1944	554.035	28.2618	6.35937	1.27385	-21.2042	64.341	Conc within Unc	546.977	27.1944
2013-09-17	Attom	NDR4	SD02A	14	-20	14863	950	222	595	135826	10.3864	2.7563	0.0626178	2.45567	0.830884	3.69154	0.0962801	2.7563	0.746652	695.275	52.3338	592.572	31.1344	614.102	33.4635	14.7715	3.50596	-11.9333	133.837	Conc within Unc	592.572	31.1344
2013-09-17	Attom	NDR4	SD02A	16	-117	46541	2947	160	1117	431241	10.7986	2.56026	0.0621651	2.056	0.793388	3.2836	0.0926047	2.56026	0.779709	679.794	43.9279	570.923	27.9165	593.092	29.0796	16.0152	3.73782	-6.91087	136.787	Conc within Unc	570.923	27.9165
2013-09-17	Attom	NDR4	SD02A	18	-29	8661	527	37	-1	91475	12.284	2.68417	0.0593361	2.53324	0.665712	3.69081	0.081407	2.68417	0.727258	579.449	55.0364	504.515	25.9989	518.102	29.5216	12.9319	2.62237	-15.935	100.933	Conc within Unc	504.515	25.9989
2013-09-17	Attom	NDR4	SD02A	26	-112	31110	1865	34	-1	307984	11.441	2.6	0.0592046	2.18279	0.713176	3.39478	0.0874048	2.6	0.76588	574.628	47.4612	540.171	26.888	546.63	28.3009	5.99648	1.18177	-21.841	61.3455	Conc within Unc	540.171	26.888
2013-09-17	Attom	NDR4	SD02A	27	-118	9919	615	51	-1	102669	11.8053	2.51053	0.0595955	2.43766	0.695731	3.49928	0.0847075	2.51053	0.717441	588.92	52.8757	524.16	25.2274	536.238	28.7449	10.9963	2.25227	-16.6674	89.9867	Conc within Unc	524.16	25.2274
2013-09-17	Attom	NDR4	SD02A	43	120	19342	1167	5	-1	184885	10.9559	2.46705	0.0587203	2.37077	0.738666	3.42153	0.0912754	2.46705	0.721037	556.742	51.7046	563.076	26.5492	561.627	29.0988	-1.13771	-0.257995	-30.5478	20.2151	Conc within Unc	563.076	26.5492
2013-09-17	Attom	NDR4	SD02A	34	-91	40950	2545	18	-1	409744	11.3941	2.63688	0.0604677	1.97066	0.731393	3.29191	0.087765	2.63688	0.801019	620.353	42.5214	542.305	27.3717	557.371	27.8543	12.5812	2.7029	-12.7891	105.42	Conc within Unc	542.305	27.3717
2013-09-17	Attom	NDR4	SD02A	36	-51	85246	5295	-6	110	880891	11.8202	2.50885	0.0598528	1.97281	0.697857	3.1916	0.0846012	2.50885	0.786078	598.256	42.7256	523.529	25.1815	537.51	26.2965	12.4909	2.60123	-12.3147	99.9089	Conc within Unc	523.529	25.1815
2013-09-17	Attom	NDR4	SD02A	40	-69	135060	8592	29	-1	1400251	11.7741	2.37747	0.0615523	2.00415	0.720483	3.1095	0.0849324	2.37747	0.764583	658.591	42.9702	525.497	23.9511	550.952	26.1053	20.209	4.62025	-0.649964	157.046	Conc within Unc	525.497	23.9511
2013-09-17	Attom	NDR4	SD02A	46	21	33549	1992	15	14	329846	11.6523	2.43282	0.0593457	2.20157	0.701917	3.28108	0.0858203	2.43282	0.741468	579.802	47.8278	530.77	24.7432	539.935	27.1152	8.45669	1.69736	-17.9505	73.7753	Conc within Unc	530.77	24.7432
2013-09-17	Attom	NDR4	SD02A	47	-48	80050	4912	142	1774	760245	10.9545	2.54505	0.0592492	2.02049	0.745408	3.24956	0.0912864	2.54505	0.783197	576.264	43.9203	563.141	27.3898	565.557	27.7986	2.27728	0.427212	-25.3825	40.5129	Conc within Unc	563.141	27.3898
2013-09-17	Attom	NDR4	SD02A	48	25	11469	703	41	-1	113938	11.4401	2.7416	0.061086	2.63575	0.735897	3.8031	0.0874117	2.7416	0.720886	642.262	56.6652	540.211	28.3513	560.008	32.2241	15.8893	3.53512	-12.4271	130.402	Conc within Unc	540.211	28.3513
2013-09-17	Attom	NDR4	SD02A	52	-13	60829	3799	25	-1	612147	11.4602	2.55265	0.0609141	2.09812	0.73254	3.30426	0.0872584	2.55265	0.772532	636.203	45.1524	539.303	26.3588	558.043	27.9823	15.231	3.3582	-9.24212	123.259	Conc within Unc	539.303	26.3588
2013-09-17	Attom	NDR4	SD02A	53	-7	357023	21620	18	-1	3391059	12.9464	5.2667	0.0591253	1.95748	0.629407	5.61871	0.0772417	5.2667	0.937351	571.714	42.5831	479.638	48.5055	495.726	43.1458	16.1053	3.24543	-27.0573	140.581	Conc within Unc	479.638	48.5055
2013-09-17	Attom	NDR4	SD02A	54	-206	47288	2895	50	-1	478360	11.6619	2.50665	0.059093	2.02338	0.698347	3.22139	0.085749	2.50665	0.778127	570.525	44.0255	530.347	25.4731	537.803	26.5496	7.04241	1.38643	-19.0933	65.6519	Conc within Unc	530.347	25.4731
2013-09-17	Attom	NDR4	SD02A	57	-105	22292	1361	35	55	227788	11.7983	2.59618	0.0604999	2.24579	0.706711	3.43274	0.0847581	2.59618	0.756299	621.5	48.4487	524.461	26.1007	542.791	28.4631	15.6136	3.37702	-10.1329	123.139	Conc within Unc	524.461	26.1007
2013-09-17	Attom	NDR4	SD02A	2	18	2211	183	140	-2	20796	10.9682	3.37847	0.0788905	3.54389	0.991275	4.89625	0.0911725	3.37847	0.690013	1169.39	70.1743	562.468	36.2924	699.371	48.3292	51.9007	19.5752	88.574	643.213	Anchored	549	36
2013-09-17	Attom	NDR4	SD02A	4	52	26869	1735	505	8983	261932	11.2207	2.79496	0.0636313	2.91356	0.781548	4.0374	0.0891207	2.79496	0.692267	729.399	61.7469	550.335	29.4195	586.366	35.3459	24.5496	6.14484	0.685349	208.484	Anchored	547	29
2013-09-17	Attom	NDR4	SD02A	7	-83	3164	746	1329	561	25840	9.20685	3.0896	0.22591	2.99834	3.38167	4.3053	0.108615	3.0896	0.717626	3023.3	48.1026	664.698	38.9088	1500.16	65.3295	78.0141	55.6914	770.129	2397.51	Anchored	532	34
2013-09-17	Attom	NDR4	SD02A	9	375	393303	32890	34326	429733	3789191	11.0263	2.56517	0.0821817	1.82499	1.02719	3.14813	0.0906921	2.56517	0.814824	1249.85	35.7199	559.629	27.4414	717.521	31.8883	55.2243	22.0052	126.003	717.662	Anchored	544	27
2013-09-17	Attom	NDR4	SD02A	13	-10	2217	196	178	77	22642	11.7521	2.99101	0.0873031	4.25514	1.02381	5.20119	0.0850909	2.99101	0.575063	1367.19	81.9197	526.438	30.1694	715.826	52.0749	61.495	26.4572	137.313	870.925	Anchored	508	29
2013-09-17	Attom	NDR4	SD02A	15	157	62204	4643	1921	4397	551109	10.0841	3.22016	0.0723389	2.78385	0.98865	4.25667	0.0991665	3.22016	0.756496	995.49	56.5743	609.522	37.348	698.031	42.0903	38.7717	12.6798	46.4188	423.316	Anchored	601	37
2013-09-17	Attom	NDR4	SD02A	17	165	19062	3470	7975	4962	168315	9.78351	3.19651	0.167739	3.05759	2.36289	4.42341	0.102213	3.19651	0.722635	2535.2	51.289	627.364	38.1048	1231.46	61.2332	75.2539	49.0552	542.862	1945.95	Anchored	546	34
2013-09-17	Attom	NDR4	SD02A	19	-85	1145	80	39	-1	10971	10.919	3.55011	0.0703877	4.90113	0.888426	6.05181	0.0915838	3.55011	0.58662	939.683	100.46	564.897	38.2879	645.523	56.2322	39.8843	12.49	24.3939	413.074	Anchored	557	38
2013-09-17	Attom	NDR4	SD02A	20	-41	9506	749	241	405	99226	11.8816	2.69981	0.0734127	3.56798	0.851532	4.47431	0.0841636	2.69981	0.603402	1025.37	72.181	520.927	26.9651	625.49	40.9514	49.1961	16.717	63.6116	531.405	Anchored	511	27
2013-09-17	Attom	NDR4	SD02A	23	-4	7571	1292	2165	1403	67058	10.1901	2.91505	0.163615	3.03899	2.21285	4.21105	0.0981347	2.91505	0.692237	2493.36	51.1889	603.468	33.499	1185.11	57.2546	75.797	49.0792	524.389	1923.39	Anchored	528	30
2013-09-17	Attom	NDR4	SD02A	25	-31	2342	168	74	12	21292	10.1749	3.47539	0.0749654	3.80654	1.0154	5.15443	0.098281	3.47539	0.674253	1067.57	76.5191	604.327	39.9724	711.597	51.4131	43.3925	15.0746	55.8573	503.219	Anchored	593	40
2013-09-17	Attom	NDR4	SD02A	29	203	185563600	445803	517111	307310500	186816400	4.28513	11.8985	0.192193	11.1806	6.18129	16.3272	0.233365	11.8985	0.72875	2761.02	183.56	1352.11	283.912	2001.81	251.508	51.0285	32.4554	398.186	1692.82	Anchored	1175	280
2013-09-17	Attom	NDR4	SD02A	31	968	29990	17193	42064	65046	115909	4.52754	3.06163	0.553139	2.40959	16.8375	3.89612	0.220871	3.06163	0.785817	4389.48	35.2294	1286.47	71.0191	2925.63	72.0663	70.6919	56.0274	1567.09	3174.02	Anchored	530	63
2013-09-17	Attom	NDR4	SD02A	33	184	48549	5613	6363	8502	449947	10.8442	2.58406	0.110036	3.49817	1.39844	4.34908	0.0922155	2.58406	0.594161	1800	63.6429	568.627	28.0673	888.276	50.2326	68.4096	35.9854	269.417	1259.44	Anchored	534	27
2013-09-17	Attom	NDR4	SD02A	35	-27	1142623	71790	21793	1077312	12640430	12.6091	2.3083	0.0610076	1.7431	0.666816	2.89252	0.0793079	2.3083	0.798025	639.503	37.4916	491.99	21.8311	518.775	23.2315	23.0668	5.16308	3.55332	169.344	Anchored	490	22
2013-09-17	Attom	NDR4	SD02A	37	-4	12072	854	257	1127	119820	11.6447	2.84127	0.067385	2.48304	0.797519	3.77337	0.085876	2.84127	0.752981	849.696	51.617	531.101	28.9054	595.428	33.4414	37.4952	10.8035	30.8858	347.501	Anchored	525	29
2013-09-17	Attom	NDR4	SD02A	38	-63	47008	2995	23	-1	493366	12.0289	2.46833	0.0620494	1.94274	0.710916	3.14116	0.0831333	2.46833	0.785802	675.811	41.5353	514.798	24.3794	545.29	26.1657	23.8251	5.59189	4.32634	185.392	Anchored	512	24
2013-09-17	Attom	NDR4	SD02A	41	32	250747	17434	4158	392	2157487	9.84658	2.65358	0.0679572	2.40121	0.951166	3.57873	0.101558	2.65358	0.741487	867.249	49.778	623.534	31.465	678.709	34.8243	28.1022	8.12952	20.3515	275.181	Anchored	618	31
2013-09-17	Attom	NDR4	SD02A	42	251	9741	4704	11206	8531	46090	5.5172	2.64954	0.462857	2.29469	11.562	3.50509	0.181251	2.64954	0.755912	4127.06	34.0474	1073.81	52.2034	2569.61	63.4872	73.9813	58.2112	1432.31	3105.45	Anchored	559	46
2013-09-17	Attom	NDR4	SD02A	45	-72	4138	633	1199	4895	36060	9.96092	3.01666	0.146076	2.73126	2.02109	4.0694	0.100392	3.01666	0.741303	2300.49	46.9276	616.708	35.3863	1122.62	53.833	73.1923	45.0655	452.084	1719.17	Anchored	553	33
2013-09-17	Attom	NDR4	SD02A	49	-7	15626	1017	162	10	162088	11.8963	2.67588	0.0641286	2.25483	0.742926	3.49923	0.0840596	2.67588	0.764706	745.876	47.6588	520.309	26.6962	564.111	29.847	30.2419	7.76489	13.9556	252.263	Anchored	516	27
2013-09-17	Attom	NDR4	SD02A	50	-96	884	67	36	-1	7779	10.1826	4.15082	0.0743434	6.4762	1.00621	7.69223	0.098207	4.15082	0.539612	1050.8	130.513	603.892	47.6797	706.96	75.4719	42.5305	14.579	27.5958	494.592	Anchored	593	48
2013-09-17	Attom	NDR4	SD02A	51	193	77823	5592	2128	349	742147	10.8776	2.53005	0.0703797	2.07862	0.891703	3.27441	0.091932	2.53005	0.772672	939.451	42.6076	566.953	27.4047	647.284	30.8704	39.6506	12.4104	49.46	399.902	Anchored	559	27
2013-09-17	Attom	NDR4	SD02A	55	-116	12682	1656	2261	6235	120217	10.8574	2.57491	0.127838	2.73044	1.62272	3.75307	0.0921033	2.57491	0.686083	2068.46	48.1236	567.965	27.9371	979.044	46.0938	72.5417	41.9878	364.985	1528.43	Anchored	521	26
2013-09-17	Attom	NDR4	SD02A	58	6	33555	2372	732	169	319594	10.7886	2.39949	0.0673889	2.08906	0.860855	3.18147	0.0926906	2.39949	0.75421	849.815	43.4263	571.43	26.1893	630.589	29.4571	32.7582	9.38154	29.7019	304.574	Anchored	566	26
2013-09-17	Attom	NDR4	SD02A	59	202	36120	3620	3665	10589	332572	10.9648	2.4229	0.0990077	2.21166	1.24444	3.28053	0.0912009	2.4229	0.73857	1605.51	41.2383	562.635	26.0555	820.893	36.2817	64.956	31.4605	221.975	1068.93	Anchored	535	25
2013-09-17	Attom	NDR4	SD02A	60	10	4321766	815679	357876	2036392	11419640	3.00794	2.50785	0.182021	1.85388	8.33988	3.11868	0.332454	2.50785	0.804137	2671.37	30.6917	1850.26	80.1725	2268.66	55.0335	30.7374	18.4425	363.366	901.283	Anchored	1682	84
2013-09-17	Attom	NDR4	SD02A	76	-94	16671	1091	88	-2	169358	11.5541	2.44585	0.0633409	1.98651	0.755534	3.15093	0.0865494	2.44585	0.776229	719.695	42.1666	535.097	25.0696	571.43	27.1719	25.6494	6.35823	9.16092	209.667	Anchored	532	25
2013-09-17	Attom	NDR4	SD02A	77	-80	807	54	-5	-2	6763	9.72138	4.64862	0.0767828	10.0272	1.08853	11.0524	0.102866	4.64862	0.4206	1115.55	200.132	631.183	55.6603	747.791	110.719	43.4197	15.5937	5.88889	540.031	Anchored	619	56
2013-09-17	Attom	NDR4	SD02A	78	-180	17859	1347	575	431	167232	10.8431	2.45851	0.0745158	2.9469	0.947108	3.83777	0.0922243	2.45851	0.640609	1055.47	59.3463	568.679	26.7088	676.596	37.219	46.1208	15.95	70.698	513.5	Anchored	558	26
Sample SD03A - Blue Nile, Wad Madani, Sudan (modern river sand)
2013-07-26	Nu Plasma HR	NDR4	SD03A	7	68.5931	0.000681666	0.000238146	n.d.	n.d.	-0.00300014	73.8938	147.795	0.377271	98.0727	0.703958	177.374	0.0135329	147.795	0.833239	3820.19	1482.97	86.6539	249.534	541.152	916.308	97.7317	83.9872	-461.81	3983.07	206 very low
2013-07-26	Nu Plasma HR	NDR4	SD03A	10	-358.251	0.0021026	-3.10286e-05	n.d.	n.d.	0.0356077	25.1981	17.4513	-0.0621559	109.402	-0.340107	110.785	0.0396855	17.4513	0.157523	#NUM!	#NUM!	250.883	85.3156	-422.072	#VALUE!	#NUM!	159.441	#VALUE!	#NUM!	206 very low
2013-07-26	Nu Plasma HR	NDR4	SD03A	17	71.0826	0.00020586	0.000245767	n.d.	n.d.	-0.020425	1340.66	1608.79	0.685711	46.6669	0.070522	1609.47	0.000745903	1608.79	0.99958	4700.42	671.556	4.80661	152.774	69.1947	1155.5	99.8977	93.0535	-1091.12	4848.38	206 very low
2013-07-26	Nu Plasma HR	NDR4	SD03A	22	-426.284	0.0330906	0.0191752	n.d.	n.d.	0.0693142	2.55891	17.975	0.680187	2.05826	36.6501	18.0925	0.390792	17.975	0.993508	4688.77	29.636	2126.5	620.351	3684.15	306.404	54.6469	42.2798	1251.25	3182.62	206 very low
2013-07-26	Nu Plasma HR	NDR4	SD03A	24	169.713	0.0269774	0.00180704	n.d.	n.d.	0.159333	8.15997	7.25591	0.0763027	10.6156	1.2893	12.8584	0.12255	7.25591	0.564291	1102.12	212.298	745.221	101.328	840.985	137.34	32.3831	11.3871	-41.576	458.23	206 very low
2013-07-26	Nu Plasma HR	NDR4	SD03A	25	462.291	0.00116254	0.000538412	n.d.	n.d.	-0.0145927	1533.57	3373.85	0.348045	71.8298	0.031292	3374.62	0.000652074	3373.85	0.999773	3697.78	1094.99	4.20217	277.402	31.2864	1131.59	99.8864	86.5687	-1104.51	3970.98	206 very low
2013-07-26	Nu Plasma HR	NDR4	SD03A	1	-997.846	1.99836	0.0975675	n.d.	n.d.	17.3963	12.7652	1.7267	0.0571865	0.402193	0.617683	1.77292	0.0783377	1.7267	0.973929	497.743	8.86013	486.193	16.1524	488.394	13.6552	2.32042	0.450695	-11.454	27.7021	Conc within Unc	486.193	16.1524
2013-07-26	Nu Plasma HR	NDR4	SD03A	3	-46.0395	0.621555	0.0326336	n.d.	n.d.	3.99244	9.52388	1.71363	0.0629634	0.77823	0.91154	1.88207	0.104999	1.71363	0.910505	706.038	16.556	643.64	20.9597	657.876	18.0642	8.83777	2.16392	-3.82828	83.3577	Conc within Unc	643.64	20.9597
2013-07-26	Nu Plasma HR	NDR4	SD03A	4	-99.8296	0.376232	0.0195155	n.d.	n.d.	2.66589	10.2865	1.87892	0.0595893	1.02367	0.798734	2.13968	0.0972148	1.87892	0.878129	587.718	22.2091	598.066	21.4276	596.114	19.1139	-1.76066	-0.32744	-21.0658	11.0799	Conc within Unc	598.066	21.4276
2013-07-26	Nu Plasma HR	NDR4	SD03A	5	-91.591	1.60889	0.0816382	n.d.	n.d.	12.5272	11.4732	1.74667	0.0590755	0.457042	0.709942	1.80548	0.0871594	1.74667	0.967429	568.9	9.94726	538.715	18.0291	544.712	15.1098	5.30583	1.10082	-9.11348	48.2139	Conc within Unc	538.715	18.0291
2013-07-26	Nu Plasma HR	NDR4	SD03A	8	-218.311	0.156292	0.00812619	n.d.	n.d.	1.02485	9.56607	2.01087	0.0608474	2.30084	0.877021	3.05572	0.104536	2.01087	0.658066	632.876	49.5423	640.938	24.4902	639.372	28.5882	-1.27381	-0.24484	-30.1536	16.4286	Conc within Unc	640.938	24.4902
2013-07-26	Nu Plasma HR	NDR4	SD03A	9	-190.396	0.174901	0.00823773	n.d.	n.d.	1.27684	10.5752	2.26118	0.0568263	1.51338	0.740907	2.7209	0.0945611	2.26118	0.831044	483.806	33.4191	582.456	25.1368	562.934	23.2476	-20.3904	-3.46783	-42.7693	-73.5133	Conc within Unc	582.456	25.1368
2013-07-26	Nu Plasma HR	NDR4	SD03A	11	-407.535	0.989717	0.0482242	n.d.	n.d.	8.09466	11.8331	1.98602	0.0579033	0.656267	0.674693	2.09164	0.0845087	1.98602	0.949503	525.118	14.3897	522.979	19.9218	523.562	16.9701	0.40741	0.111314	-16.3873	22.0612	Conc within Unc	522.979	19.9218
2013-07-26	Nu Plasma HR	NDR4	SD03A	12	-140.992	0.183253	0.00922747	n.d.	n.d.	1.35967	10.7065	1.8429	0.058893	2.20739	0.758432	2.87557	0.0934011	1.8429	0.640884	562.161	48.0974	575.62	20.2647	573.105	24.8796	-2.39421	-0.438911	-27.395	6.80538	Conc within Unc	575.62	20.2647
2013-07-26	Nu Plasma HR	NDR4	SD03A	13	-148.823	0.362591	0.0172061	n.d.	n.d.	3.09947	12.4434	1.78663	0.0558881	1.10936	0.61927	2.10303	0.0803637	1.78663	0.849551	446.925	24.6539	498.293	17.1118	489.39	16.203	-11.4936	-1.81927	-25.1063	-34.2561	Conc within Unc	498.293	17.1118
2013-07-26	Nu Plasma HR	NDR4	SD03A	14	83.5466	0.988983	0.0494812	n.d.	n.d.	7.58879	10.9929	1.92671	0.0592879	0.506005	0.743628	1.99205	0.0909679	1.92671	0.967201	576.708	10.9984	561.259	20.6797	564.52	17.1079	2.67897	0.577796	-13.8462	36.1295	Conc within Unc	561.259	20.6797
2013-07-26	Nu Plasma HR	NDR4	SD03A	15	-321.124	0.441337	0.0229384	n.d.	n.d.	3.20196	10.3961	1.81915	0.0614204	0.895468	0.814595	2.0276	0.0961895	1.81915	0.897192	653.023	19.2171	592.039	20.5478	605.028	18.3181	9.33874	2.14685	-5.32907	81.5319	Conc within Unc	592.039	20.5478
2013-07-26	Nu Plasma HR	NDR4	SD03A	16	182.947	2.0898	0.107004	n.d.	n.d.	15.4501	10.6397	1.90256	0.0606163	0.461922	0.785529	1.95784	0.0939878	1.90256	0.971769	624.677	9.95982	579.079	21.0396	588.633	17.3427	7.29955	1.6231	-7.78862	66.6382	Conc within Unc	579.079	21.0396
2013-07-26	Nu Plasma HR	NDR4	SD03A	18	70.2887	2.18808	0.109951	n.d.	n.d.	17.1365	11.4906	1.84842	0.0586456	0.579754	0.70371	1.93721	0.0870276	1.84842	0.954168	552.984	12.652	537.934	19.0512	541.004	16.1206	2.72154	0.567573	-13.05	34.1009	Conc within Unc	537.934	19.0512
2013-07-26	Nu Plasma HR	NDR4	SD03A	20	69.728	0.271812	0.0142682	n.d.	n.d.	2.01532	10.5777	2.26148	0.0603916	1.35781	0.787205	2.63779	0.0945388	2.26148	0.85734	616.663	29.3158	582.325	25.1347	589.585	23.3247	5.56836	1.23146	-16.0642	59.4727	Conc within Unc	582.325	25.1347
2013-07-26	Nu Plasma HR	NDR4	SD03A	21	137.324	0.366668	0.0188395	n.d.	n.d.	2.67494	10.2572	2.37882	0.0606407	1.81396	0.815149	2.99153	0.0974925	2.37882	0.795186	625.544	39.1065	599.697	27.1872	605.338	26.922	4.13189	0.931854	-21.2812	53.034	Conc within Unc	599.697	27.1872
2013-07-26	Nu Plasma HR	NDR4	SD03A	28	143.43	0.675021	0.0333069	n.d.	n.d.	5.14031	10.771	2.20461	0.0587963	0.629291	0.752655	2.29267	0.0928419	2.20461	0.961593	558.582	13.72	572.323	24.1021	569.763	19.7997	-2.45988	-0.449206	-22.3591	10.3617	Conc within Unc	572.323	24.1021
2013-07-26	Nu Plasma HR	NDR4	SD03A	29	38.9836	0.704636	0.0385444	n.d.	n.d.	4.04537	8.23305	1.94297	0.0637557	0.799929	1.06773	2.10119	0.121462	1.94297	0.924698	732.583	16.9441	738.971	27.0742	737.624	21.7983	-0.872106	-0.182652	-23.1456	20.6853	Conc within Unc	738.971	27.0742
2013-07-26	Nu Plasma HR	NDR4	SD03A	30	360.218	0.381888	0.0190425	n.d.	n.d.	2.83571	10.5938	2.18521	0.0581564	1.06609	0.756917	2.43139	0.0943951	2.18521	0.898746	534.673	23.3378	581.478	24.2549	572.23	21.0524	-8.75389	-1.61622	-30.3009	-22.5499	Conc within Unc	581.478	24.2549
2013-07-26	Nu Plasma HR	NDR4	SD03A	31	-275.955	8.74832	0.442669	n.d.	n.d.	75.4316	12.3354	1.78207	0.0588371	0.39091	0.657655	1.82444	0.0810673	1.78207	0.976776	560.092	8.5206	502.49	17.2062	513.178	14.5938	10.2843	2.08275	-3.90555	74.8079	Conc within Unc	502.49	17.2062
2013-07-26	Nu Plasma HR	NDR4	SD03A	32	-214.165	0.283057	0.0144511	n.d.	n.d.	2.37215	11.7736	1.7115	0.0587099	1.09011	0.687551	2.02918	0.0849361	1.7115	0.843445	555.375	23.7798	525.519	17.2517	531.328	16.6518	5.37588	1.09338	-10.8424	47.1079	Conc within Unc	525.519	17.2517
2013-07-26	Nu Plasma HR	NDR4	SD03A	33	-53.0592	0.441477	0.0227304	n.d.	n.d.	3.42702	10.8945	1.83487	0.0602188	0.714063	0.762121	1.96892	0.0917891	1.83487	0.931919	610.472	15.433	566.11	19.8581	575.233	17.1476	7.26691	1.58609	-8.0239	64.2205	Conc within Unc	566.11	19.8581
2013-07-26	Nu Plasma HR	NDR4	SD03A	35	9.82253	2.5868	0.125019	n.d.	n.d.	22.2906	12.1378	1.68921	0.0572397	0.401819	0.650219	1.73635	0.0823874	1.68921	0.972855	499.791	8.84878	510.357	16.5559	508.614	13.7994	-2.11407	-0.342825	-15.5431	5.99	Conc within Unc	510.357	16.5559
2013-07-26	Nu Plasma HR	NDR4	SD03A	37	0.0140139	0.167975	0.00852913	n.d.	n.d.	1.40359	11.9292	1.84463	0.0595758	2.18209	0.688591	2.85731	0.0838282	1.84463	0.645584	587.227	47.3455	518.932	18.3683	531.953	23.3906	11.6301	2.4478	-10.3694	86.6634	Conc within Unc	518.932	18.3683
2013-07-26	Nu Plasma HR	NDR4	SD03A	38	-86.5126	0.607398	0.0325724	n.d.	n.d.	4.01367	9.49331	1.88355	0.0627108	0.749472	0.910806	2.02719	0.105337	1.88355	0.929147	697.48	15.9666	645.612	23.1012	657.486	19.4357	7.43655	1.806	-7.56149	74.9697	Conc within Unc	645.612	23.1012
2013-07-26	Nu Plasma HR	NDR4	SD03A	40	-126.527	0.497921	0.0253767	n.d.	n.d.	3.62654	10.197	1.67455	0.0602034	0.647804	0.814048	1.79548	0.0980681	1.67455	0.932644	609.921	14.0022	603.077	19.2528	604.722	16.2318	1.12202	0.272041	-14.5867	26.0963	Conc within Unc	603.077	19.2528
2013-07-26	Nu Plasma HR	NDR4	SD03A	43	93.5285	0.481389	0.0248824	n.d.	n.d.	3.5163	10.252	1.80539	0.0604139	0.678652	0.812509	1.92873	0.0975417	1.80539	0.936051	617.46	14.6505	599.986	20.6534	603.86	17.4081	2.8299	0.641619	-13.5336	38.1269	Conc within Unc	599.986	20.6534
2013-07-26	Nu Plasma HR	NDR4	SD03A	44	-82.4993	5.43826	0.270966	n.d.	n.d.	47.9344	12.4495	1.6541	0.0586422	0.443366	0.649469	1.71249	0.0803242	1.6541	0.965904	552.858	9.67582	498.058	15.8369	508.152	13.6016	9.91221	1.98644	-3.50747	70.6373	Conc within Unc	498.058	15.8369
2013-07-26	Nu Plasma HR	NDR4	SD03A	46	68.9793	2.46453	0.128079	n.d.	n.d.	17.4025	9.93224	1.5998	0.0609012	0.410501	0.845435	1.65163	0.100682	1.5998	0.968621	634.779	8.83622	618.406	18.8395	622.14	15.2506	2.57935	0.600271	-11.5161	35.2128	Conc within Unc	618.406	18.8395
2013-07-26	Nu Plasma HR	NDR4	SD03A	48	45.7092	0.752279	0.0365515	n.d.	n.d.	6.6593	12.4469	1.60556	0.0576708	0.572213	0.638846	1.70448	0.0803413	1.60556	0.941965	516.29	12.5656	498.16	15.3757	501.592	13.4042	3.51168	0.684171	-9.97243	33.5061	Conc within Unc	498.16	15.3757
2013-07-26	Nu Plasma HR	NDR4	SD03A	52	-279.414	1.29356	0.0629542	n.d.	n.d.	11.4104	12.2965	1.61649	0.0577382	0.675463	0.647417	1.75194	0.0813242	1.61649	0.922686	518.854	14.8265	504.022	15.6552	506.888	13.8863	2.85867	0.565446	-11.0201	30.4875	Conc within Unc	504.022	15.6552
2013-07-26	Nu Plasma HR	NDR4	SD03A	53	201.883	0.716085	0.0357709	n.d.	n.d.	5.75221	11.2038	1.8328	0.058756	0.867996	0.723082	2.02794	0.0892553	1.8328	0.90377	557.086	18.9292	551.132	19.3337	552.485	17.1367	1.06887	0.24494	-15.7835	25.2883	Conc within Unc	551.132	19.3337
2013-07-26	Nu Plasma HR	NDR4	SD03A	54	6.76362	0.267945	0.0136864	n.d.	n.d.	1.86272	9.62924	1.72756	0.0605826	1.23798	0.867476	2.12533	0.10385	1.72756	0.81284	623.478	26.6983	636.934	20.9206	634.196	19.8535	-2.15821	-0.431778	-22.5918	7.46462	Conc within Unc	636.934	20.9206
2013-07-26	Nu Plasma HR	NDR4	SD03A	55	100.867	0.0230096	0.00144953	n.d.	n.d.	0.170805	10.1107	4.88683	0.0716761	11.8589	0.977448	12.8263	0.098905	4.88683	0.381	975.841	241.726	607.988	56.4587	692.295	121.219	37.696	12.1779	-36.9116	424.311	Conc within Unc	607.988	56.4587
2013-07-26	Nu Plasma HR	NDR4	SD03A	56	79.5592	0.349761	0.0181912	n.d.	n.d.	2.59111	10.3078	1.73714	0.0612426	0.996039	0.819197	2.00244	0.0970138	1.73714	0.867514	646.8	21.3974	596.885	19.776	607.6	18.1485	7.71723	1.7636	-7.43282	69.691	Conc within Unc	596.885	19.776
2013-07-26	Nu Plasma HR	NDR4	SD03A	57	23.6715	2.58621	0.128672	n.d.	n.d.	21.2895	11.4776	1.60197	0.0584972	0.376087	0.702721	1.64552	0.0871259	1.60197	0.973532	547.45	8.21507	538.517	16.5315	540.415	13.6984	1.63181	0.351294	-11.8	25.4648	Conc within Unc	538.517	16.5315
2013-07-26	Nu Plasma HR	NDR4	SD03A	59	-118.472	0.208529	0.0106873	n.d.	n.d.	1.37907	9.51767	1.82923	0.0607801	1.8098	0.880506	2.57322	0.105068	1.82923	0.710872	630.493	38.9846	644.04	22.3843	641.256	24.1776	-2.14855	-0.434106	-26.9614	8.8378	Conc within Unc	644.04	22.3843
2013-07-26	Nu Plasma HR	NDR4	SD03A	60	101.82	0.124607	0.00662223	n.d.	n.d.	0.912325	10.2177	2.07275	0.0631538	2.05847	0.852211	2.92123	0.0978693	2.07275	0.709546	712.457	43.7457	601.91	23.7787	625.862	26.9345	15.5163	3.827	-2.9828	134.326	Conc within Unc	601.91	23.7787
2013-07-26	Nu Plasma HR	NDR4	SD03A	2	-114.597	2.62259	0.173789	n.d.	n.d.	18.2668	10.2089	1.5946	0.0778296	1.54183	1.05116	2.21811	0.0979542	1.5946	0.718903	1141.63	30.655	602.408	18.3156	729.457	22.8255	47.2328	17.4169	104.223	557.541	Anchored	589	18
2013-07-26	Nu Plasma HR	NDR4	SD03A	6	62.0179	0.0435261	0.0067502	n.d.	n.d.	0.277226	9.25646	3.90925	0.180144	3.88578	2.68334	5.51194	0.108033	3.90925	0.709233	2653.45	64.4399	661.312	48.9547	1323.88	78.4362	75.0773	50.0473	584.129	2041.09	Anchored	566	44
2013-07-26	Nu Plasma HR	NDR4	SD03A	23	70.1325	0.0618013	0.0123907	n.d.	n.d.	0.423166	9.69688	2.60788	0.236913	4.22096	3.36867	4.96161	0.103126	2.60788	0.525612	3098.63	67.2933	632.702	31.3561	1497.14	74.8656	79.5812	57.7393	789.572	2497.29	Anchored	498	30
2013-07-26	Nu Plasma HR	NDR4	SD03A	26	157.591	0.0503949	0.00407913	n.d.	n.d.	0.334207	9.32005	3.59037	0.0951717	6.82976	1.40796	7.71599	0.107296	3.59037	0.465316	1530.63	128.605	657.022	44.6991	892.299	87.7198	57.075	26.3674	147.557	918.304	Anchored	630	44
2013-07-26	Nu Plasma HR	NDR4	SD03A	34	54.9393	0.160796	0.00896921	n.d.	n.d.	1.16652	10.2484	2.14782	0.0658958	1.6693	0.886554	2.72024	0.0975767	2.14782	0.789571	802.127	34.9648	600.192	24.5714	644.516	25.6336	25.175	6.87722	18.6912	226.507	Anchored	596	25
2013-07-26	Nu Plasma HR	NDR4	SD03A	36	-17.3234	0.0579965	0.0033459	n.d.	n.d.	0.473448	11.6565	2.5792	0.0675621	4.44036	0.799168	5.13508	0.0857894	2.5792	0.502271	854.217	92.2397	530.587	26.2203	596.359	45.2951	37.8862	11.029	20.4775	349.85	Anchored	524	26
2013-07-26	Nu Plasma HR	NDR4	SD03A	39	-65.3051	1.20546	0.0673881	n.d.	n.d.	8.85452	10.382	1.75095	0.0652777	0.474894	0.866932	1.81421	0.0963206	1.75095	0.965132	782.354	9.9786	592.81	19.8033	633.9	16.9657	24.2274	6.48212	24.1245	209.347	Anchored	589	20
2013-07-26	Nu Plasma HR	NDR4	SD03A	41	-53.6298	1.28977	0.0778413	n.d.	n.d.	9.40819	10.3721	1.8846	0.0713055	0.617063	0.947886	1.98305	0.0964122	1.8846	0.950355	965.265	12.5983	593.348	21.3308	677.001	19.4102	38.53	12.3564	64.2425	393.248	Anchored	585	21
2013-07-26	Nu Plasma HR	NDR4	SD03A	42	-16.1746	0.288152	0.0157159	n.d.	n.d.	2.19786	10.8997	1.74054	0.0648697	2.15817	0.820597	2.77257	0.0917459	1.74054	0.627769	769.166	45.4444	565.855	18.8305	608.382	25.0662	26.4328	6.99019	17.4609	222.142	Anchored	562	19
2013-07-26	Nu Plasma HR	NDR4	SD03A	45	118.372	0.858588	0.0449629	n.d.	n.d.	6.75621	10.9353	1.92274	0.0605538	0.858741	0.763502	2.1058	0.0914466	1.92274	0.913072	622.452	18.5228	564.087	20.7365	576.029	18.3477	9.37657	2.07309	-6.40606	79.1011	Anchored	563	21
2013-07-26	Nu Plasma HR	NDR4	SD03A	47	63.9652	7.40382	0.390411	n.d.	n.d.	57.0254	10.7467	1.62026	0.0613993	0.521179	0.787753	1.70202	0.0930519	1.62026	0.951963	652.286	11.1861	573.561	17.759	589.896	15.1171	12.069	2.76911	1.21778	96.4835	Anchored	572	18
2013-07-26	Nu Plasma HR	NDR4	SD03A	49	385.92	2.88022	0.20041	n.d.	n.d.	27.3014	13.2794	1.59575	0.0819052	0.170929	0.850419	1.60488	0.0753043	1.59575	0.994312	1242.37	3.34912	468.034	14.3919	624.879	14.869	62.3274	25.1001	141.976	788.729	Anchored	454	14
2013-07-26	Nu Plasma HR	NDR4	SD03A	50	76.8445	0.283417	0.0510821	n.d.	n.d.	1.45307	7.04329	2.05775	0.213375	3.51494	4.17704	4.07298	0.141979	2.05775	0.505219	2930.63	56.8399	855.844	32.9001	1669.53	64.6343	70.7965	48.7373	749.049	2107.68	Anchored	704	32
2013-07-26	Nu Plasma HR	NDR4	SD03A	58	-28.1078	0.544198	0.0290548	n.d.	n.d.	3.9304	10.0268	1.86185	0.0631311	0.918723	0.868127	2.07618	0.0997329	1.86185	0.896766	711.693	19.5268	612.844	21.7326	634.55	19.4064	13.8894	3.42068	2.29949	120.582	Anchored	611	22
Sample SD04A - Nile Trunk, Dongola, Sudan (modern river sand)
2013-07-01	Attom	NDR4	SD04A	8	55.6283	864.732	593.679	1397.69	2267.95	1902.39	1.96187	5.53588	0.692072	3.31803	48.6168	6.45409	0.509717	5.53588	0.857732	4713.7	47.7172	2655.42	236.578	3964.39	120.93	43.6658	33.0181	1188.04	1821.7	7/6 > 0.5
2013-07-01	Attom	NDR4	SD04A	13	16.5903	438.908	291.197	619.84	-1.45349	1720.23	3.43105	6.61034	0.704742	5.95564	28.308	8.89754	0.291456	6.61034	0.74294	4739.77	85.5421	1648.8	189.525	3429.82	161.048	65.2135	51.9275	1619.97	2901.45	7/6 > 0.5
2013-07-01	Attom	NDR4	SD04A	15	1319.47	29439.9	23518.7	55039.6	2159	12505	0.357549	4.92648	0.755083	1.32612	291.048	5.10185	2.79682	4.92648	0.965628	4838.64	18.9589	8600.57	451.675	5764.25	98.3329	-77.7477	-49.2055	-2934.66	-4213.61	7/6 > 0.5
2013-07-01	Attom	NDR4	SD04A	16	-74.6411	434.188	166.586	280.334	-1.34409	3948.9	8.05536	5.79849	0.426361	9.5766	7.29454	11.1953	0.124141	5.79849	0.517941	4004.08	143.142	754.354	82.0334	2148.14	182.509	81.1604	64.8834	1211.28	3167.69	Bonkers
2013-07-01	Attom	NDR4	SD04A	19	-80.4198	1203.93	973.002	2587.6	2553.33	358.537	0.255306	7.01163	0.789263	3.48174	426.056	7.8285	3.91687	7.01163	0.895654	4901.84	49.6332	10267	682.682	6150.09	147.374	-109.452	-66.9411	-4264.31	-6047.86	7/6 > 0.5
2013-07-01	Attom	NDR4	SD04A	25	171.364	7489.61	4484.61	10712.2	3831.77	25733.8	3.15552	3.36815	0.576571	1.93913	25.1819	3.88647	0.316905	3.36815	0.866634	4449.38	28.2609	1774.6	103.662	3315.3	73.207	60.1158	46.4724	1467.49	2571.12	7/6 > 0.5
2014-06-05	Attom	NDZ14	SD04A	8	-2.69323	152.982	49.1664	111.423	102.783	599.711	3.7997	12.608	0.302267	11.1959	10.9635	16.8615	0.263179	12.608	0.747738	3481.88	173.276	1506.08	330.076	2520.04	273.438	56.7451	40.2356	740.514	1645.72	206 counts < 1000
2014-06-05	Attom	NDZ14	SD04A	1	-28.2561	21.2346	3.31503	15.4919	-1.06383	91.0874	6.37678	1032.59	-0.000498951	9884.9	-0.0107836	9938.69	0.156819	1032.59	0.103896			939.075	8605.24	-11.0089						206 counts < 1000
2014-06-05	Attom	NDZ14	SD04A	2	-31.0622	162.771	124.792	328.976	24.2883	-1.59575	-0.0157588	14.1196	0.851847	10.4801	-7449.82	17.5839	-63.4568	14.1196	0.802981	5011	148.673									7/6 > 0.5
2014-06-05	Attom	NDZ14	SD04A	4	187.192	610.54	329.064	748.516	85.5561	1737.74	3.41635	6.53215	0.584581	6.00574	23.5824	8.87344	0.29271	6.53215	0.736147	4470.13	87.4326	1655.06	187.93	3251.29	159.635	62.9752	49.0953	1436.6	2627.15	7/6 > 0.5
2014-06-05	Attom	NDZ14	SD04A	7	4842.45	95012.9	79323.9	198540	71567.9	9517.98	0.12243	3.93848	0.825555	0.403269	929.32	3.95907	8.16796	3.93848	0.994799	4966.48	5.73208	14283.4	437.227	6940.68	77.295	-187.597	-105.793	-7420.03	-9754.16	7/6 > 0.5
2014-06-05	Attom	NDZ14	SD04A	9	46.7803	372.064	316.254	779.068	618.173	229.466	0.638119	8.70597	0.884647	5.81294	191.062	10.4682	1.5671	8.70597	0.831655	5064.53	82.2727	6077.54	651.179	5338.7	192.104	-20.0021	-13.8394	-930.947	-1664.19	7/6 > 0.5
2014-06-05	Attom	NDZ14	SD04A	10	35.0037	233.069	109.226	273.438	86.9646	957.706	4.38172	9.28412	0.546802	10.7065	17.1985	14.1713	0.228221	9.28412	0.655137	4372.62	156.677	1325.17	218.666	2945.97	240.974	69.694	55.0176	1379.83	2828.79	7/6 > 0.5
2014-06-05	Attom	NDZ14	SD04A	16	190.91	4749.19	3837.53	9296.56	-1.06383	22.669	-0.000588285	9.1136	0.810469	1.66496	-189869	9.26444	-1699.86	9.1136	0.983719	4940.25	23.6935									7/6 > 0.5
2014-06-05	Attom	NDZ14	SD04A	17	41.9257	113.865	85.1196	228.672	216.101	66.5204	-0.0572542	22.6316	0.77165	13.5848	-1857.46	26.3958	-17.466	22.6316	0.857396	4870.29	193.934									7/6 > 0.5
2014-06-05	Attom	NDZ14	SD04A	18	-2.59196	1133.47	586.729	1419.72	1941.61	4329.56	3.82942	7.26593	0.525949	4.59914	18.9285	8.59918	0.261136	7.26593	0.844957	4315.63	67.5124	1495.65	191.113	3038.18	153.634	65.3434	50.7714	1388.89	2628.87	7/6 > 0.5
2014-06-05	Attom	NDZ14	SD04A	22	-169.391	713.008	520.43	1283.1	170.535	654.214	0.993242	7.06359	0.714229	4.80773	99.1033	8.5445	1.0068	7.06359	0.826682	4759.61	68.9892	4490.21	441.427	4677.06	158.71	5.66028	3.9951	28.1437	-172.02	7/6 > 0.5
2014-06-05	Attom	NDZ14	SD04A	23	141.734	1029.4	837.474	2188.32	1332.56	1091.22	1.09446	8.60055	0.806711	4.63846	101.584	9.77163	0.913693	8.60055	0.880155	4933.63	66.0279	4183.95	508.804	4701.91	179.635	15.1954	11.0161	338.332	240.881	7/6 > 0.5
2014-06-05	Attom	NDZ14	SD04A	25	30115	588547	481743	-249.631	11067800	176506	0.358212	2.60146	0.816372	0.360809	314.09	2.62636	2.79164	2.60146	0.990518	4950.57	5.13218	8591.78	242.331	5841.35	51.8209	-73.5513	-47.0854	-2802.24	-3883.54	7/6 > 0.5
2014-06-05	Attom	NDZ14	SD04A	27	185.051	935.815	699.751	-249.631	-0.352113	1409.92	1.43325	9.40341	0.773925	3.49829	74.4189	10.0331	0.697716	9.40341	0.937243	4874.49	49.9313	3411.98	479.933	4389.56	183.433	30.0033	22.2705	794.146	982.577	7/6 > 0.5
2014-06-05	Attom	NDZ14	SD04A	28	116021	-111.03	1756004	-249.631	3033.91	88908.6	-881.659	4.95213	-15619.4	1.28504	2441.57	5.11615	-0.00113423	4.95213	0.967942			-7.31584	-0.725032	7920.81	98.8797		100.092	7829.24	8.04087	206 counts < 1000
2014-06-05	Attom	NDZ14	SD04A	29	-53.7387	-111.03	295.036	-249.631	-0.352113	10140.3	-100.542	4.45529	-2.6243	9.80386	3.59727	10.7687	-0.00994611	4.45529	0.413726			-64.4377	-5.77316	1548.93	158.139		104.16	1455.23	70.2109	206 counts < 1000
2014-06-05	Attom	NDZ14	SD04A	35	245.635	3349.76	2637.16	6430.09	6079.82	823.563	0.261256	6.61119	0.782891	2.00953	412.991	6.90985	3.82766	6.61119	0.956777	4890.93	28.6607	10149	642.682	6118.54	131.139	-107.507	-65.8728	-4161.59	-5900.75	7/6 > 0.5
2014-06-05	Attom	NDZ14	SD04A	26	16.0859	101.638	88.3523	-249.631	-0.352113	11.6103	-0.0165066	20.1391	0.300312	43.1307	-2507.38	47.6009	-60.5817	20.1391	0.423082	3471.83	668.011									206 counts < 1000
2014-06-05	Attom	NDZ14	SD04A	39	-17.0188	514.939	185.497	424.623	183.025	2703	6.31347	8.69063	0.379285	10.1222	8.27949	13.3411	0.158392	8.69063	0.651416	3828.92	152.972	947.832	151.414	2262.08	216.838	75.2454	58.099	1097.41	2729.67	206 counts < 1000
2014-06-05	Attom	NDZ14	SD04A	36	38.396	1443.79	722.944	1880.65	435.083	5071.45	4.17456	7.79943	0.47192	4.29548	15.5798	8.90406	0.239546	7.79943	0.875941	4155.8	63.6272	1384.34	191.458	2851.39	157.108	66.6891	51.4504	1309.94	2580.01	v. imprecise
2014-06-05	Attom	NDZ14	SD04A	37	-115.46	1348.58	500.605	1037.62	239.746	8041.32	6.32499	6.22578	0.384402	5.10239	8.3759	8.04952	0.158103	6.22578	0.773435	3849.16	77.0097	946.226	108.66	2272.57	136.44	75.4173	58.3632	1189.91	2794.27	v. imprecise
2013-07-01	Attom	NDR4	SD04A	9	-46.3953	19204.5	1402.05	148.81	252.714	170755	7.86027	2.68884	0.0686681	1.37227	1.20399	3.01877	0.127222	2.68884	0.890707	887.856	28.3557	771.999	39.0078	802.427	32.9487	13.0491	3.79201	-2.52057	76.8494	Conc within Unc	771.999	39.0078
2013-07-01	Attom	NDR4	SD04A	18	-28.6831	59885.7	4413.71	3257.9	37128.6	490224	7.25058	2.63696	0.0710627	2.04631	1.35075	3.3378	0.13792	2.63696	0.790028	958.299	41.8235	832.889	41.0755	867.883	38.2199	13.0867	4.03203	-3.22661	84.3345	Conc within Unc	832.889	41.0755
2013-07-01	Attom	NDR4	SD04A	21	-96.5346	11866.6	765.891	55.4968	-1.34409	129271	9.80847	2.83046	0.0647478	2.31402	0.909766	3.65598	0.101953	2.83046	0.7742	765.205	48.7573	625.842	33.6749	656.933	34.7662	18.2124	4.73275	-3.67519	105.687	Conc within Unc	625.842	33.6749
2014-06-05	Attom	NDZ14	SD04A	5	142.655	6406.1	385.118	69.2394	17.8756	67831.9	12.2131	3.01625	0.0606926	2.21251	0.684881	3.74072	0.0818792	3.01625	0.806329	628.356	47.6763	507.33	29.3644	529.72	30.4186	19.2608	4.22684	-8.02821	91.6623	Conc within Unc	507.33	29.3644
2014-06-05	Attom	NDZ14	SD04A	6	-59.3882	15907.7	1011.02	47.4999	166.847	133898	9.92692	2.75636	0.0626081	1.50195	0.869205	3.13901	0.100736	2.75636	0.878099	694.947	32.0105	618.722	32.4409	635.136	29.2182	10.9685	2.58429	-12.8045	43.7845	Conc within Unc	618.722	32.4409
2014-06-05	Attom	NDZ14	SD04A	11	100.632	4716.52	285.272	12.8858	-1.06383	44283.6	10.9535	3.00767	0.0591943	2.60669	0.74479	3.98007	0.0912952	3.00767	0.755684	574.251	56.6819	563.192	32.3589	565.197	33.9285	1.92577	0.35468	-31.9239	-21.3002	Conc within Unc	563.192	32.3589
2014-06-05	Attom	NDZ14	SD04A	12	46.3817	1129.94	78.1097	39.8642	-1.06383	11058.9	11.2151	4.16989	0.0679168	6.13656	0.8346	7.41925	0.0891653	4.16989	0.562036	866.015	127.238	550.598	43.8628	616.161	66.3277	36.4216	10.6406	-0.764712	271.554	Conc within Unc	550.598	43.8628
2014-06-05	Attom	NDZ14	SD04A	14	-38.9443	3941.77	222.221	32.351	-1.06383	38308.9	11.3312	3.02254	0.057145	2.66101	0.695041	4.027	0.0882523	3.02254	0.750568	497.134	58.6271	545.193	31.5249	535.824	32.9911	-9.66717	-1.74836	-42.3592	-79.5837	Conc within Unc	545.193	31.5249
2014-06-05	Attom	NDZ14	SD04A	20	56.9293	16194.1	987.022	-4.56046	-1.06383	148219	10.7808	2.85223	0.060284	1.34334	0.770646	3.15274	0.0927571	2.85223	0.904683	613.783	29.0173	571.823	31.1392	580.134	27.4903	6.83631	1.43261	-19.1792	10.8209	Conc within Unc	571.823	31.1392
2014-06-05	Attom	NDZ14	SD04A	24	216.618	38681.8	2313.52	194.292	17.8297	392238	11.6841	2.67968	0.0595281	0.997831	0.702155	2.85943	0.0855865	2.67968	0.937137	586.463	21.653	529.382	27.1804	540.077	23.6756	9.73305	1.98029	-12.9805	29.9004	Conc within Unc	529.382	27.1804
2014-06-05	Attom	NDZ14	SD04A	34	-47.2356	109248	6688.07	210.132	247.299	1121064	11.8183	2.60423	0.0599859	0.686961	0.699522	2.69331	0.0846148	2.60423	0.966925	603.067	14.8656	523.609	26.1407	538.506	22.2665	13.1756	2.76623	-7.37015	53.3169	Conc within Unc	523.609	26.1407
2014-06-05	Attom	NDZ14	SD04A	38	-255.598	106342	6395.67	-41.984	-1.35135	892354	9.84596	2.95173	0.0599639	0.623902	0.839339	3.01694	0.101564	2.95173	0.978383	602.272	13.5029	623.571	34.9927	618.781	27.5798	-3.53642	-0.774069	-32.3696	-56.2915	Conc within Unc	623.571	34.9927
2013-07-01	Attom	NDR4	SD04A	1	-197.532	983.762	124.391	139.996	-1.45349	10408.6	9.4252	4.65775	0.125395	6.61139	1.83356	8.08734	0.106099	4.65775	0.57593	2033.58	116.99	650.05	57.3464	1057.56	101.073	68.0343	38.5328	306.434	1326.19	Anchored	600	55
2013-07-01	Attom	NDR4	SD04A	2	-228.591	3644.78	268.677	99.5515	10.0048	40426.9	9.58041	3.18601	0.069967	2.65588	1.0065	4.14782	0.10438	3.18601	0.768118	926.46	54.5501	640.024	38.7069	707.106	41.3972	30.9172	9.48676	25.6842	247.729	Anchored	633	39
2013-07-01	Attom	NDR4	SD04A	3	-64.8723	14843.1	1249.74	722.484	-1.45349	147203	8.70311	3.24812	0.0822849	2.95692	1.30302	4.39246	0.114901	3.24812	0.739477	1251.43	57.8617	701.15	43.015	847.054	49.2544	43.9719	17.2249	96.6496	507.26	Anchored	685	43
2013-07-01	Attom	NDR4	SD04A	4	-60.7608	2792.8	207.918	76.2863	-1.45349	34871	10.6863	3.40964	0.0765488	5.02458	0.987225	6.07224	0.0935777	3.40964	0.561514	1108.56	100.389	576.661	37.5073	697.304	59.4833	47.9811	17.3013	61.1591	494.392	Anchored	565	37
2013-07-01	Attom	NDR4	SD04A	5	94.1376	2025.23	369.506	588.498	-1.45349	20357.5	8.59295	3.66081	0.174043	3.97847	2.7914	5.40646	0.116375	3.66081	0.677118	2596.16	66.3402	709.662	49.0141	1353.24	77.7777	72.6649	47.5581	565.795	1837.48	Anchored	614	45
2013-07-01	Attom	NDR4	SD04A	6	25.6282	3701.53	453.284	555.067	34.2608	42172.3	10.4349	3.24727	0.128786	5.48853	1.70093	6.3772	0.0958323	3.24727	0.5092	2080.68	96.6003	589.938	36.5094	1008.88	78.4475	71.6468	41.5256	340.497	1454.23	Anchored	541	35
2013-07-01	Attom	NDR4	SD04A	7	-260.262	6752.55	812.752	911.694	45.7164	74334.5	9.68802	3.1902	0.118113	3.29546	1.68023	4.58666	0.10322	3.1902	0.695539	1927.06	59.0428	633.253	38.3686	1001.07	56.7747	67.139	36.7422	311.04	1255.44	Anchored	589	36
2013-07-01	Attom	NDR4	SD04A	10	-197.763	3151.63	298.896	203.811	-1.45349	34151.3	9.17342	3.62773	0.0904638	3.71191	1.35909	5.19025	0.109011	3.62773	0.698951	1434.48	70.804	667	45.8113	871.481	58.9765	53.5024	23.4637	145.505	721.671	Anchored	644	45
2013-07-01	Attom	NDR4	SD04A	11	43.2829	4455.12	489.935	417.564	18.0778	50034.7	9.51242	3.57777	0.103699	3.50211	1.50241	5.00652	0.105126	3.57777	0.714623	1690.52	64.5915	644.378	43.7305	931.364	59.2771	61.8829	30.8135	227.709	1002.41	Anchored	611	42
2013-07-01	Attom	NDR4	SD04A	12	-335.098	10284	873.134	479.81	8.1619	110778	9.34313	2.93108	0.0812451	2.48846	1.19843	3.84495	0.107031	2.93108	0.762318	1226.5	48.8691	655.479	36.4331	799.859	41.6967	46.5568	18.0507	102.683	534.585	Anchored	640	36
2013-07-01	Attom	NDR4	SD04A	14	-171.047	904.611	219.655	303.837	-1.45349	7863.42	7.81225	4.69813	0.238286	7.19368	4.20366	8.59194	0.128004	4.69813	0.546807	3107.84	114.6	776.469	68.3725	1674.74	131.989	75.0158	53.6363	766.277	2263	Anchored	613	64
2013-07-01	Attom	NDR4	SD04A	17	81.8969	3631.3	408.727	322.009	21.6151	47721.2	11.5027	3.21384	0.104497	6.28698	1.25202	7.0608	0.0869364	3.21384	0.455167	1704.65	115.747	537.393	33.0564	824.316	76.7428	68.4749	34.8074	210.18	1134.2	Anchored	507	32
2013-07-01	Attom	NDR4	SD04A	20	-107.706	14399.4	1098.49	382.917	324.317	151361	9.35211	2.75447	0.0738665	2.12726	1.08854	3.48028	0.106928	2.75447	0.79145	1036.91	42.96	654.88	34.214	747.793	36.1838	36.8433	12.425	56.7292	347.82	Anchored	645	34
2013-07-01	Attom	NDR4	SD04A	22	94.4532	957.917	200.852	262.636	-1.34409	10453.2	9.78564	4.22128	0.202988	5.9464	2.85882	7.29238	0.102191	4.22128	0.578861	2849.64	96.8471	627.234	50.2634	1371.13	104.182	77.989	54.2544	639.718	2172.14	Anchored	519	46
2013-07-01	Attom	NDR4	SD04A	23	-44.3925	4268.37	526.263	855.124	1508.92	50784.8	10.3722	3.09861	0.122163	3.39178	1.62322	4.59408	0.0964116	3.09861	0.67448	1987.26	60.3403	593.345	35.0341	979.237	56.1484	70.1426	39.4074	329.743	1358.88	Anchored	549	33
2013-07-01	Attom	NDR4	SD04A	24	-80.2498	12409.2	1440.02	1995.81	7071.6	96498.7	6.91128	3.11377	0.113407	2.75505	2.26146	4.15763	0.144691	3.11377	0.748929	1853.91	49.7948	871.135	50.5457	1200.36	56.9184	53.0108	27.4272	272.307	932.225	Anchored	823	49
2014-06-05	Attom	NDZ14	SD04A	3	-16.7545	6114.54	400.207	105.57	5.91292	59526.8	11.758	3.35941	0.0640847	2.64712	0.751149	4.27702	0.0850483	3.35941	0.785457	744.427	55.9635	526.185	33.86	568.891	36.5894	29.3167	7.50677	6.11587	184.382	Anchored	522	34
2014-06-05	Attom	NDZ14	SD04A	13	8.03012	3101.61	456.18	689.338	240.476	20839.9	7.72634	3.60715	0.149165	3.03625	2.66071	4.71491	0.129427	3.60715	0.765052	2336.37	51.9709	784.598	53.0752	1317.62	67.3117	66.4181	40.4534	465.71	1498.7	Anchored	705	49
2014-06-05	Attom	NDZ14	SD04A	15	28.9945	1825.61	155.13	718.764	1480.42	15657.2	10.0616	3.61549	0.082009	4.04183	1.12332	5.42293	0.0993881	3.61549	0.666704	1245.73	79.1559	610.822	42.0033	764.562	56.6513	50.9668	20.1083	97.089	592.907	Anchored	595	41
2014-06-05	Attom	NDZ14	SD04A	19	-36.8527	18850.8	1551.77	1209.48	523.161	147488	9.31841	2.66557	0.0811905	1.91387	1.2008	3.28149	0.107314	2.66557	0.812306	1226.06	37.5875	657.133	33.2205	800.954	35.7238	46.4028	17.9562	108.097	535.705	Anchored	642	33
2014-06-05	Attom	NDZ14	SD04A	21	-10.963	30841.2	2106.81	773.998	238.538	309778	11.7479	2.53785	0.0677701	1.19993	0.79503	2.80722	0.0851215	2.53785	0.904042	861.532	24.8974	526.62	25.616	594.021	24.9404	38.874	11.3466	42.4606	309.296	Anchored	520	25
2014-06-05	Attom	NDZ14	SD04A	31	20.2442	42391.1	2580.59	547.328	107.553	478374	13.5714	2.46239	0.0610553	1.08955	0.620016	2.69267	0.0736841	2.46239	0.914479	641.183	23.428	458.313	21.7505	489.858	20.7152	28.5207	6.43953	10.8293	161.12	Anchored	456	22
2014-06-05	Attom	NDZ14	SD04A	32	104.535	2620.04	1066.89	2332.92	3022.73	12873.2	5.63109	4.78958	0.397225	4.34777	9.72187	6.46863	0.177585	4.78958	0.740432	3898.61	65.4137	1053.77	92.4576	2408.78	112.627	72.9706	56.2529	1242.38	2752.38	Anchored	635	75
2014-06-05	Attom	NDZ14	SD04A	33	-49.5949	7824.87	517.253	37.7291	-1.35135	67041.2	9.94923	2.9581	0.0658564	1.99666	0.912252	3.5689	0.10051	2.9581	0.828856	801.816	41.8237	617.399	34.7382	658.254	33.9995	22.9999	6.2066	6.85574	149.679	Anchored	613	35
2014-06-05	Attom	NDZ14	SD04A	40	21.5792	7081.95	929.226	1235.11	672.229	46164.4	7.35693	3.52373	0.124989	3.86868	2.34143	5.23291	0.135926	3.52373	0.673379	2028.64	68.4958	821.585	54.1351	1224.96	71.861	59.5008	32.9295	331.512	1152.92	Anchored	763	52
Sample SD06A - River Atbara, Sudan (modern river sand)
2013-07-01	Attom	NDR4	SD06A	2	4678.47	343912	91803.4	194270	2880494	16676470	45.6726	1.93271	0.255085	1.3218	0.769724	2.34148	0.021895	1.93271	0.825422	3215.89	20.8743	139.621	5.3367	579.605	20.4736	95.6584	75.911	419.51	3070.93	Not rutile - ?monazite?
2013-07-01	Attom	NDR4	SD06A	9	730.515	400766	37556.1	89490	3433556	20012360	47.7526	2.84108	0.0908893	1.13845	0.262314	3.06069	0.0209413	2.84108	0.928249	1443.43	21.6894	133.602	7.50899	236.53	12.8347	90.7441	43.5159	90.0935	1302.32	Not rutile - ?monazite?
2013-07-01	Attom	NDR4	SD06A	58	-438.245	204539	12418.5	31.8727	10.7597	19079670	-7.78568e-06	11.6235	0.0588464	1.32863		11.6991		11.6235	0.99353	560.436	28.9582									Failed
2013-07-01	Attom	NDR4	SD06A	60	-125.38	188.542	143.316	243.142	-3.90625	602.579	2.99672	8.925	0.50994	9.84327	23.452	13.287	0.333698	8.925	0.671707	4269.54	144.863	1856.28	281.663	3245.89	230.527	56.5227	42.8112	1159.08	2131.59	7/6 > 0.5
2013-07-01	Attom	NDR4	SD06A	68	14.1502	127.587	51.2678	71.9184	-0.976563	694.357	4.83633	10.1356	0.46745	16.5894	13.3207	19.4407	0.206768	10.1356	0.52136	4141.03	245.944	1211.58	220.101	2702.65	313.456	70.7421	55.1707	1177.61	2709.36	206 counts < 1000
2013-07-01	Attom	NDR4	SD06A	1	-63.6404	5479.13	336.99	45.1817	148.5	69236.6	11.7931	2.51392	0.0588236	2.43795	0.68743	3.50191	0.084795	2.51392	0.71787	559.595	53.1441	524.68	25.2854	531.255	28.5657	6.23918	1.23754	-21.9912	9.62874	Conc within Unc	524.68	25.2854
2013-07-01	Attom	NDR4	SD06A	3	47.5695	45765.5	2739.45	27.555	-0.538794	560998	11.96	2.20378	0.0569149	1.34321	0.655847	2.58086	0.0836123	2.20378	0.853893	487.247	29.6436	517.648	21.8865	512.07	20.5497	-6.23943	-1.08926	-26.1274	-52.2879	Conc within Unc	517.648	21.8865
2013-07-01	Attom	NDR4	SD06A	4	-173.291	14088	862.003	50.468	-0.538794	159581	11.1877	2.14364	0.0585812	1.63213	0.721645	2.69426	0.0893839	2.14364	0.795632	550.585	35.6325	551.892	22.6368	551.637	22.6788	-0.237347	-0.0461951	-22.9336	-23.9436	Conc within Unc	551.892	22.6368
2013-07-01	Attom	NDR4	SD06A	6	-187.865	28069.3	1840.97	5.20918	-0.538794	298604	10.1548	2.17464	0.0587251	1.215	0.797001	2.49104	0.0984758	2.17464	0.872984	555.937	26.5018	605.47	25.0858	595.135	22.192	-8.90978	-1.73653	-32.5267	-74.6186	Conc within Unc	605.47	25.0858
2013-07-01	Attom	NDR4	SD06A	7	25.5916	94756.4	6054.59	671.132	56.4789	1123034	11.4505	2.05613	0.058928	1.15934	0.709258	2.36045	0.0873327	2.05613	0.871075	563.456	25.2555	539.743	21.2568	544.305	19.6985	4.20843	0.838233	-15.1359	2.45587	Conc within Unc	539.743	21.2568
2013-07-01	Attom	NDR4	SD06A	10	69.653	12024	755.764	76.6095	4.33007	110065	8.82453	2.3036	0.0622299	2.09412	0.971882	3.11318	0.11332	2.3036	0.73995	681.059	44.7331	692.003	30.1597	689.433	30.6914	-1.60695	-0.372722	-33.2611	-41.104	Conc within Unc	692.003	30.1597
2013-07-01	Attom	NDR4	SD06A	11	39.4725	13884.5	862.997	14.8359	-0.183824	145388	9.68935	2.38585	0.0604266	1.89684	0.859488	3.04799	0.103206	2.38585	0.782759	617.915	40.9453	633.171	28.7126	629.843	28.2145	-2.46889	-0.528299	-31.542	-43.9682	Conc within Unc	633.171	28.7126
2013-07-01	Attom	NDR4	SD06A	13	-55.9149	17078.4	1086.85	49.4343	11.506	175164	9.65445	2.09946	0.0601739	2.15719	0.858988	3.01018	0.103579	2.09946	0.697452	608.862	46.6357	635.35	25.3554	629.57	27.8607	-4.35039	-0.918137	-33.641	-51.8433	Conc within Unc	635.35	25.3554
2013-07-01	Attom	NDR4	SD06A	14	-148.005	3976.64	261.28	38.4106	38.9531	40937.4	9.98094	2.57631	0.0625964	2.86296	0.864339	3.85149	0.100191	2.57631	0.668913	693.589	61.0308	615.528	30.178	632.489	35.6292	11.2547	2.68158	-18.6685	47.8834	Conc within Unc	615.528	30.178
2013-07-01	Attom	NDR4	SD06A	16	-195.142	88977.1	5101.13	183.68	1907.43	1018197	11.1004	1.99507	0.0557695	1.48388	0.692413	2.4864	0.0900872	1.99507	0.802391	442.201	33.0041	556.053	21.2223	534.249	20.4508	-25.7465	-4.08113	-42.2542	-135.074	Conc within Unc	556.053	21.2223
2013-07-01	Attom	NDR4	SD06A	19	-257.704	98107.7	6144.07	49.1455	-1.03306	933870	8.83938	2.65249	0.0608873	1.71255	0.949316	3.1573	0.11313	2.65249	0.840113	634.288	36.8665	690.901	34.663	677.747	30.7546	-8.92543	-1.94084	-43.9086	-91.2759	Conc within Unc	690.901	34.663
2013-07-01	Attom	NDR4	SD06A	22	-219.56	11867.5	735.99	56.6887	-1.03306	138886	11.2702	2.26848	0.0597745	2.28645	0.730956	3.22084	0.0887297	2.26848	0.704311	594.448	49.5496	548.02	23.7919	557.114	27.2517	7.81023	1.63234	-18.1577	22.6358	Conc within Unc	548.02	23.7919
2013-07-01	Attom	NDR4	SD06A	26	-627.318	88143.6	5298.99	33.5204	5.21695	1059028	11.5907	1.92858	0.0588305	1.59038	0.699517	2.49975	0.0862759	1.92858	0.771512	559.849	34.6666	533.475	19.7184	538.502	20.6823	4.711	0.933627	-15.6547	6.65607	Conc within Unc	533.475	19.7184
2013-07-01	Attom	NDR4	SD06A	27	-204.194	75883.3	4795.11	34.5621	6.13908	804865	10.3358	1.90775	0.0596405	1.45321	0.795249	2.3982	0.0967511	1.90775	0.795496	589.581	31.5183	595.341	21.6615	594.145	21.3476	-0.976942	-0.201291	-22.5436	-27.4214	Conc within Unc	595.341	21.6615
2013-07-01	Attom	NDR4	SD06A	28	-131.422	35573.7	2246.55	45.7364	7.89552	393512	10.4988	2.20929	0.0590948	1.17044	0.775741	2.50017	0.0952492	2.20929	0.883653	569.613	25.4708	586.507	24.7238	583.051	21.9415	-2.96595	-0.59276	-25.3976	-41.6183	Conc within Unc	586.507	24.7238
2013-07-01	Attom	NDR4	SD06A	30	-260.317	17909.9	1190.36	173.05	14.3178	180614	9.79478	2.1828	0.0629071	1.84629	0.885138	2.85892	0.102095	2.1828	0.763507	704.136	39.29	626.676	26.0179	643.754	26.9007	11.0007	2.65291	-9.82247	51.4421	Conc within Unc	626.676	26.0179
2013-07-01	Attom	NDR4	SD06A	32	-43.2267	85719.7	5489.34	61.9706	-1.80041	845176	9.48791	2.13949	0.0616488	2.12088	0.895488	3.01256	0.105397	2.13949	0.71019	660.984	45.4549	645.962	26.2474	649.314	28.4988	2.27272	0.516231	-25.1468	-11.225	Conc within Unc	645.962	26.2474
2013-07-01	Attom	NDR4	SD06A	36	-107.034	2537.07	164.437	16.8645	-1.80041	32381.9	11.9404	3.01034	0.0587332	4.25177	0.677907	5.20957	0.0837492	3.01034	0.577847	556.24	92.7355	518.462	29.9231	525.509	41.8678	6.79166	1.34086	-34.8214	7.85484	Conc within Unc	518.462	29.9231
2013-07-01	Attom	NDR4	SD06A	39	-251.081	45288.5	2727.16	32.5882	-1.80041	455317	10.094	2.51383	0.0590109	1.32898	0.805699	2.84351	0.0990684	2.51383	0.884061	566.518	28.936	608.947	29.1483	600.039	25.4442	-7.48955	-1.48465	-34.3527	-71.5779	Conc within Unc	608.947	29.1483
2013-07-01	Attom	NDR4	SD06A	40	-174.217	42789.9	2887.7	59.925	-1.80041	447783	10.0511	2.22733	0.06334	1.59534	0.8685	2.73973	0.0994915	2.22733	0.812974	718.71	33.869	611.428	25.933	634.753	25.5371	14.9269	3.67451	-2.21303	81.3485	Conc within Unc	611.428	25.933
2013-07-01	Attom	NDR4	SD06A	41	-205.497	60813	3839.31	60.2443	74.3361	582114	9.68473	2.28261	0.0596062	1.87101	0.848223	2.95144	0.103255	2.28261	0.77339	588.334	40.5883	633.458	27.4847	623.673	27.1414	-7.6699	-1.56894	-36.9265	-72.6093	Conc within Unc	633.458	27.4847
2013-07-01	Attom	NDR4	SD06A	42	-275.288	6563.75	440.681	32.6979	7.12817	64083	9.48295	2.6236	0.0659363	2.96193	0.958268	3.9568	0.105452	2.6236	0.66306	803.412	62.0271	646.283	32.1868	682.399	38.5783	19.5577	5.29246	-2.46265	124.942	Conc within Unc	646.283	32.1868
2013-07-01	Attom	NDR4	SD06A	43	119.861	36833.3	2264.65	37.4327	-1.80041	442800	11.6091	2.22216	0.0587762	1.53198	0.697767	2.69907	0.0861396	2.22216	0.823307	557.835	33.4052	532.666	22.6818	537.456	22.2809	4.51194	0.891309	-17.4905	2.48741	Conc within Unc	532.666	22.6818
2013-07-01	Attom	NDR4	SD06A	44	-338.674	21917.5	1300.89	40.2637	10.0531	263816	11.972	1.97524	0.0576931	1.7195	0.664147	2.61882	0.0835284	1.97524	0.754246	517.139	37.7542	517.149	19.602	517.147	21.0058	-0.00200702	-0.000370411	-21.0077	-19.6124	Conc within Unc	517.149	19.602
2013-07-01	Attom	NDR4	SD06A	46	-57.3893	52468.3	3060.16	41.2936	-0.892858	633944	11.5393	2.16102	0.0561012	1.37728	0.670037	2.5626	0.0866605	2.16102	0.843293	455.377	30.5632	535.756	22.1813	520.735	20.6674	-17.6511	-2.88462	-35.6886	-102.56	Conc within Unc	535.756	22.1813
2013-07-01	Attom	NDR4	SD06A	47	-135.493	4018.14	255.166	25.8939	52.8353	46682.8	11.1551	2.73977	0.0647474	4.16292	0.799934	4.9836	0.0896449	2.73977	0.549757	765.193	87.7144	553.437	28.9952	596.791	44.0103	27.6736	7.26464	-0.655567	182.761	Conc within Unc	553.437	28.9952
2013-07-01	Attom	NDR4	SD06A	49	-15.3422	42696.8	2681.3	56.0664	-0.892858	433879	9.81028	2.13923	0.0614379	1.69151	0.863099	2.72718	0.101934	2.13923	0.78441	653.634	36.2969	625.732	25.4631	631.813	25.3378	4.2687	0.962463	-19.2568	2.43864	Conc within Unc	625.732	25.4631
2013-07-01	Attom	NDR4	SD06A	50	-96.5582	94742.2	5920.24	155.332	18.3379	905082	9.33484	2.19327	0.0604874	1.83516	0.893026	2.85976	0.107126	2.19327	0.766942	620.083	39.5995	656.033	27.3034	647.993	27.0336	-5.79758	-1.24068	-35.0731	-63.2533	Conc within Unc	656.033	27.3034
2013-07-01	Attom	NDR4	SD06A	52	13.6937	15677.5	976.954	20.352	-0.892858	151648	9.62971	2.30712	0.0609765	2.32461	0.87268	3.27515	0.103845	2.30712	0.70443	637.437	50.0163	636.904	27.9226	637.022	30.5307	0.0835929	0.0183936	-30.4136	-27.3897	Conc within Unc	636.904	27.9226
2013-07-01	Attom	NDR4	SD06A	53	-159.368	13323.4	834.709	19.882	8.48215	160527	11.152	2.43187	0.0590813	1.6977	0.730138	2.96583	0.0896704	2.43187	0.819961	569.115	36.9481	553.587	25.7498	556.634	25.1045	2.72835	0.54738	-22.0576	-10.2224	Conc within Unc	553.587	25.7498
2013-07-01	Attom	NDR4	SD06A	54	-148.25	25541.5	1612.7	11.5747	-0.892858	257448	9.8907	2.29067	0.0612051	1.91602	0.852837	2.98635	0.101105	2.29067	0.767047	645.482	41.1699	620.882	27.061	626.205	27.5377	3.81118	0.850113	-22.2142	-2.46051	Conc within Unc	620.882	27.061
2013-07-01	Attom	NDR4	SD06A	55	-90.7335	22960.9	1355.88	0.145139	-0.892858	281031	11.6806	2.05841	0.0571834	2.08009	0.674697	2.92641	0.0856117	2.05841	0.703393	497.621	45.8245	529.532	20.8947	523.564	23.6644	-6.41271	-1.13979	-29.632	-52.8057	Conc within Unc	529.532	20.8947
2013-07-01	Attom	NDR4	SD06A	56	-192.095	12951.5	886.96	6.95907	-0.892858	108516	8.1281	2.3756	0.0652455	2.17886	1.10629	3.22349	0.12303	2.3756	0.736964	781.319	45.7904	747.98	33.4667	756.386	33.8131	4.26703	1.11134	-25.4072	-0.127566	Conc within Unc	747.98	33.4667
2013-07-01	Attom	NDR4	SD06A	59	2.24483	12125.3	791.211	94.048	-3.90625	117008	9.37579	2.12783	0.0635508	1.9608	0.934155	2.8935	0.106658	2.12783	0.73538	725.76	41.5798	653.308	26.386	669.818	27.9906	9.98288	2.46489	-11.4803	46.0657	Conc within Unc	653.308	26.386
2013-07-01	Attom	NDR4	SD06A	62	-141.72	10304	626.816	20.8977	147.461	119899	11.2445	2.08101	0.058471	2.22465	0.716647	3.04626	0.0889322	2.08101	0.683137	546.473	48.6024	549.219	21.8748	548.686	25.5027	-0.502366	-0.0971369	-26.0356	-24.6201	Conc within Unc	549.219	21.8748
2013-07-01	Attom	NDR4	SD06A	63	-121.453	35238	2248.89	65.5408	168.816	357604	9.66036	2.1573	0.0607848	1.57571	0.867178	2.67148	0.103516	2.1573	0.80753	630.66	33.9411	634.98	26.0381	634.034	24.8886	-0.68505	-0.149313	-25.8353	-30.3584	Conc within Unc	634.98	26.0381
2013-07-01	Attom	NDR4	SD06A	64	7.6571	52738.2	3449.69	16.2617	-0.976563	524884	9.46268	2.01043	0.0618464	1.64644	0.900754	2.59857	0.105678	2.01043	0.773666	667.839	35.2468	647.601	24.7264	652.131	24.7048	3.03037	0.694647	-20.1748	-4.48837	Conc within Unc	647.601	24.7264
2013-07-01	Attom	NDR4	SD06A	65	116.936	21985.1	1577.6	312.005	3674.23	149448	6.58846	2.62611	0.069355	1.68171	1.45077	3.11843	0.151781	2.62611	0.842126	908.39	34.6384	910.937	44.4641	910.193	36.8125	-0.28028	-0.0816669	-37.5559	-47.0101	Conc within Unc	910.937	44.4641
2013-07-01	Attom	NDR4	SD06A	67	-138.435	4521.1	286.103	41.1763	-0.976563	51702.4	11.1655	2.57076	0.0636717	3.6037	0.785913	4.42668	0.0895616	2.57076	0.580743	729.792	76.3682	552.944	27.1872	588.851	38.8084	24.2326	6.09782	-2.90137	149.66	Conc within Unc	552.944	27.1872
2013-07-01	Attom	NDR4	SD06A	69	-73.8935	20412	1280.87	22.0138	-0.976563	219490	10.296	2.04416	0.0597413	1.76622	0.799672	2.70151	0.0971251	2.04416	0.756676	593.243	38.2835	597.539	23.2892	596.644	24.0892	-0.724194	-0.15002	-24.9843	-27.5854	Conc within Unc	597.539	23.2892
2013-07-01	Attom	NDR4	SD06A	70	-70.7975	30933	1932.43	15.9716	-0.976563	323449	10.1192	2.17832	0.060885	1.8611	0.829217	2.86509	0.0988216	2.17832	0.760296	634.206	40.0648	607.499	25.2084	613.178	26.0388	4.21109	0.926062	-20.3604	1.49862	Conc within Unc	607.499	25.2084
2013-07-01	Attom	NDR4	SD06A	72	-278.594	11782.6	715.31	10.853	-0.976563	133028	11.068	2.33025	0.0607107	2.35567	0.755968	3.31349	0.0903508	2.33025	0.703261	628.032	50.7638	557.612	24.8473	571.681	28.5634	11.2129	2.46112	-14.4936	45.5731	Conc within Unc	557.612	24.8473
2013-07-01	Attom	NDR4	SD06A	73	-128.14	2866.64	190.402	12.8445	-0.976563	28142.5	9.54946	2.63271	0.0640981	4.5189	0.925065	5.22988	0.104718	2.63271	0.503398	743.918	95.5434	641.999	32.0952	665.035	49.795	13.7003	3.4639	-26.7589	69.8237	Conc within Unc	641.999	32.0952
2013-07-01	Attom	NDR4	SD06A	74	16.6054	4387.45	272.346	19.2044	-0.976563	49664.5	10.8097	2.82006	0.0601518	3.07989	0.766901	4.17594	0.0925092	2.82006	0.675312	608.067	66.5922	570.36	30.7137	577.984	36.1565	6.20111	1.31905	-28.5326	6.99317	Conc within Unc	570.36	30.7137
2013-07-01	Attom	NDR4	SD06A	76	-154.815	58394.8	3565.93	52.6787	-1.70068	667674	10.8857	2.43852	0.0590226	1.44541	0.747255	2.83471	0.0918638	2.43852	0.860235	566.951	31.4689	566.55	26.3973	566.63	24.3259	0.0706542	0.0140993	-24.246	-25.9968	Conc within Unc	566.55	26.3973
2013-07-01	Attom	NDR4	SD06A	77	-145.489	42421.9	2755.22	61.3764	-1.70068	465025	10.3457	2.19339	0.0619658	1.98968	0.82546	2.96138	0.0966581	2.19339	0.740665	671.966	42.5657	594.794	24.8767	611.09	26.8365	11.4844	2.66668	-10.5407	52.2947	Conc within Unc	594.794	24.8767
2013-07-01	Attom	NDR4	SD06A	80	-184.338	6563.32	392.452	25.9335	-1.70068	78970	11.7237	2.42483	0.0594318	3.17138	0.698652	3.99217	0.0852974	2.42483	0.607395	581.974	68.8713	527.665	24.5239	537.985	32.8088	9.33187	1.9183	-22.4886	29.7852	Conc within Unc	527.665	24.5239
2013-07-01	Attom	NDR4	SD06A	85	51.3384	26930.3	1638.28	52.2625	112.524	324442	11.3158	2.54862	0.0597038	2.03807	0.727151	3.26331	0.0883724	2.54862	0.780993	591.882	44.186	545.904	26.6253	554.88	27.5241	7.76809	1.61758	-18.5485	19.3526	Conc within Unc	545.904	26.6253
2013-07-01	Attom	NDR4	SD06A	86	-284.227	54028.8	3175.6	54.2981	-1.70068	624447	11.173	2.19039	0.0573061	1.29878	0.706867	2.5465	0.0895017	2.19039	0.860158	502.341	28.589	552.589	23.1575	542.884	21.1934	-10.0028	-1.78768	-30.8985	-73.4055	Conc within Unc	552.589	23.1575
2013-07-01	Attom	NDR4	SD06A	18	-391.465	90756.2	5481.52	114.72	-1.03306	1091743	11.3763	2.11731	0.058268	1.38785	0.705887	2.53162	0.0879021	2.11731	0.836344	538.871	30.3597	543.118	22.0191	542.301	21.0539	-0.788096	-0.150552	-21.8704	-26.2659	Conc within Unc	543.118	22.0191
2013-07-01	Attom	NDR4	SD06A	5	-123.091	1568.55	112.972	75.2526	120.224	18471.1	11.168	3.8085	0.0718472	5.33464	0.886626	6.55462	0.0895415	3.8085	0.581041	980.7	108.658	552.825	40.2279	644.555	60.7038	43.6296	14.2315	31.0263	387.647	Anchored	544	40
2013-07-01	Attom	NDR4	SD06A	8	26.184	477.254	39.2908	12.1395	-0.538794	4984.41	10.1859	7.82799	0.0905748	9.66483	1.2255	12.4373	0.098175	7.82799	0.629396	1436.82	184.296	603.705	89.5996	812.289	130.346	57.9833	25.6785	78.2378	743.516	Anchored	581	88
2013-07-01	Attom	NDR4	SD06A	12	-179.58	1801.48	123.886	11.995	1.32553	22315.6	12.4001	3.32605	0.0679684	4.84289	0.75542	5.87505	0.0806447	3.32605	0.566132	866.659	100.404	499.97	31.9223	571.365	50.0868	42.3107	12.4955	21.3082	334.767	Anchored	493	32
2013-07-01	Attom	NDR4	SD06A	15	34.7348	5473.74	412.597	105.297	8.30842	53009.4	9.60089	2.59185	0.0734773	3.05563	1.05475	4.00682	0.104157	2.59185	0.64686	1026.24	61.808	638.725	31.4454	731.23	40.9323	37.7604	12.6506	51.5729	356.066	Anchored	629	31
2013-07-01	Attom	NDR4	SD06A	17	-104.638	17733.5	1191.83	55.2931	6.3822	181103	9.66207	2.51403	0.0644098	2.29326	0.918729	3.40285	0.103497	2.51403	0.738801	754.166	48.406	634.873	30.3287	661.688	32.5607	15.8179	4.05248	-5.74594	88.9643	Anchored	632	30
2013-07-01	Attom	NDR4	SD06A	20	-50.327	11548.6	830.861	315.889	229.9	138517	11.3243	2.59422	0.0674903	1.83589	0.821367	3.17812	0.0883059	2.59422	0.816274	852.007	38.1504	545.51	27.082	608.811	28.6959	35.9735	10.3974	34.6045	279.414	Anchored	540	27
2013-07-01	Attom	NDR4	SD06A	21	76.6405	4371.15	597.681	746.169	26.7447	41197.6	8.99884	2.82216	0.125425	4.01996	1.92089	4.91169	0.111125	2.82216	0.57458	2034	71.1305	679.28	36.2875	1088.38	63.5643	66.6038	37.5877	345.532	1318.43	Anchored	627	25
2013-07-01	Attom	NDR4	SD06A	23	62.6166	4403.31	333.899	157.101	956.166	49683.2	10.7019	2.47966	0.0699341	2.90871	0.9006	3.82222	0.0934409	2.47966	0.64875	925.494	59.7521	575.855	27.2624	652.048	36.1299	37.7786	11.6852	40.063	322.377	Anchored	568	27
2013-07-01	Attom	NDR4	SD06A	24	-86.9744	12604.1	1444.78	211.032	197.926	51720.3	3.87547	2.22176	0.108342	3.37694	3.8528	4.04227	0.258033	2.22176	0.549633	1770.9	61.6584	1479.77	58.4868	1603.85	63.167	16.4394	7.73661	60.917	232.638	Anchored	1770.9	61.6584
2013-07-01	Attom	NDR4	SD06A	25	-200.544	3752.52	317.361	137.109	-1.03306	37507.9	9.68859	2.5762	0.0782082	3.87617	1.11249	4.65419	0.103214	2.5762	0.553523	1151.27	76.9577	633.218	31.0001	759.374	48.5929	44.9985	16.6132	77.5631	487.056	Anchored	620	31
2013-07-01	Attom	NDR4	SD06A	29	-60.0158	12845.1	804.782	168.85	2099.68	157515	11.7282	2.22958	0.06187	2.31049	0.727035	3.21082	0.0852647	2.22958	0.694394	668.655	49.456	527.471	22.5447	554.811	27.0848	21.1147	4.92789	0.25577	118.64	Anchored	525	22
2013-07-01	Attom	NDR4	SD06A	31	-150.945	3422.86	228.424	51.448	-1.80041	44251.3	12.3865	2.63185	0.0648721	3.72605	0.721798	4.56181	0.0807331	2.63185	0.576932	769.244	78.4581	500.497	25.2983	551.728	38.1114	34.9366	9.28549	13.1193	243.449	Anchored	496	25
2013-07-01	Attom	NDR4	SD06A	33	104.614	2469.57	183.283	66.9784	-1.80041	32597.1	12.4897	3.09529	0.0686912	4.89542	0.757976	5.79189	0.0800661	3.09529	0.534419	888.551	101.145	496.517	29.5157	572.842	49.4876	44.1206	13.3239	26.8371	362.518	Anchored	490	29
2013-07-01	Attom	NDR4	SD06A	34	-6.12138	7835.99	521.952	24.9127	-1.80041	96679.4	11.5623	2.17466	0.0637382	2.62046	0.759736	3.40528	0.0864883	2.17466	0.638614	732.001	55.5118	534.735	22.2803	573.858	29.4253	26.9489	6.81756	9.69783	174.986	Anchored	531	22
2013-07-01	Attom	NDR4	SD06A	35	-115.184	3414.53	294.704	210.788	16.7181	42529.1	11.8034	2.80698	0.082786	2.98653	0.96662	4.0986	0.0847213	2.80698	0.684864	1263.3	58.3422	524.242	28.2041	686.72	40.1075	58.502	23.6599	122.37	710.85	Anchored	508	28
2013-07-01	Attom	NDR4	SD06A	37	-116.363	18838.2	1215.72	96.9095	253.781	226334	11.416	2.18658	0.0618903	2.1461	0.747161	3.0638	0.0875962	2.18658	0.713681	669.358	45.932	541.305	22.6656	566.576	26.2647	19.1307	4.4602	-0.994306	105.387	Anchored	539	23
2013-07-01	Attom	NDR4	SD06A	38	-165.378	12639.7	808.629	21.4164	24.6419	133044	9.89841	2.27857	0.0620472	2.34634	0.863899	3.27066	0.101026	2.27857	0.696671	674.775	50.1727	620.421	26.8993	632.249	30.3273	8.05515	1.87081	-18.4991	27.4548	Anchored	619	27
2013-07-01	Attom	NDR4	SD06A	45	-154.946	792.19	66.7158	48.3229	-1.80041	9994.55	12.1017	4.59999	0.0857513	8.22331	0.976565	9.42246	0.0826332	4.59999	0.488194	1331.71	159.099	511.821	45.1085	691.842	90.394	61.5667	26.0206	89.6272	774.784	Anchored	494	44
2013-07-01	Attom	NDR4	SD06A	48	133.861	5981.89	551.024	32.0278	53.3525	32081.1	5.19707	2.61973	0.0865768	2.95506	2.29588	3.9491	0.192416	2.61973	0.663374	1350.22	57.025	1134.45	54.2736	1211.02	54.3818	15.9806	6.32272	22.1876	161.5	Anchored	1122	56
2013-07-01	Attom	NDR4	SD06A	51	-29.6337	20263.8	1398.55	176.681	465.629	219172	10.4137	2.1477	0.0657482	1.84877	0.870133	2.83383	0.0960276	2.1477	0.75788	797.427	38.7531	591.087	24.2148	635.64	26.4291	25.8757	7.00912	18.1236	182.125	Anchored	587	24
2013-07-01	Attom	NDR4	SD06A	57	275.122	684.73	292.081	591.309	-0.892858	3792.44	5.08307	9.15996	0.398847	6.12882	10.814	11.0212	0.196732	9.15996	0.83112	3904.06	92.1783	1157.74	191.276	2507.27	186.62	70.3453	53.8247	1162.91	2555.05	Anchored	699	140
2013-07-01	Attom	NDR4	SD06A	61	-58.4165	19015	1551.79	956.184	1908.56	185804	9.39256	2.41658	0.0803791	2.02	1.17941	3.14964	0.106467	2.41658	0.767254	1205.42	39.7901	652.198	29.9101	791.039	34.0367	45.8945	17.5517	104.804	523.312	Anchored	637	30
2013-07-01	Attom	NDR4	SD06A	66	-39.6488	4267.37	283.013	29.661	38.4972	52133.1	11.8463	3.12208	0.0646565	3.60416	0.752204	4.76837	0.0844145	3.12208	0.654749	762.231	75.9773	522.419	31.258	569.502	40.7417	31.4619	8.26745	6.34168	208.554	Anchored	518	31
2013-07-01	Attom	NDR4	SD06A	71	-44.8416	39916.1	2746.77	656.464	29.1574	392604	9.73017	2.08152	0.0678538	2.14756	0.961081	2.99078	0.102773	2.08152	0.695981	863.16	44.5484	630.64	24.9622	683.856	29.3373	26.9382	7.78177	23.8788	207.557	Anchored	625	25
2013-07-01	Attom	NDR4	SD06A	75	-72.565	743.189	106.968	149.632	429.948	8382.06	10.5312	4.51987	0.148247	6.39218	1.94006	7.82874	0.094956	4.51987	0.577343	2325.04	109.544	584.781	50.3388	1095.02	99.8355	74.8485	46.5963	410.403	1689.92	Anchored	522	47
2013-07-01	Attom	NDR4	SD06A	78	-155.052	2045.3	142.03	31.9155	-1.70068	19748.2	9.67327	2.84175	0.0683717	4.23972	0.974112	5.10399	0.103378	2.84175	0.556769	878.913	87.73	634.173	34.2359	690.581	49.899	27.8458	8.16827	6.50946	210.504	Anchored	628	34
2013-07-01	Attom	NDR4	SD06A	79	-1.70017	7777.92	498.885	57.066	57.5667	94198.4	11.8532	2.0546	0.0626169	3.01521	0.728053	3.64868	0.0843655	2.0546	0.563107	694.289	64.2688	522.127	20.5765	555.41	30.7474	24.7968	5.99234	2.53463	151.585	Anchored	519	21
2013-07-01	Attom	NDR4	SD06A	81	-107.22	1075.83	82.0703	21.3881	-1.70068	12863.8	11.558	3.53926	0.075732	6.09597	0.903032	7.04891	0.0865203	3.53926	0.5021	1087.09	122.184	534.925	36.2343	653.347	65.7509	50.7931	18.1254	52.671	515.933	Anchored	524	36
2013-07-01	Attom	NDR4	SD06A	82	-145.97	4612.32	313.202	49.3305	-1.70068	54074.6	11.2654	2.3106	0.0665954	3.31003	0.814712	4.03673	0.0887676	2.3106	0.572393	824.206	69.0874	548.244	24.2423	605.094	36.1519	33.4821	9.39522	20.698	251.719	Anchored	543	24
2013-07-01	Attom	NDR4	SD06A	83	-66.912	11167.6	1022.17	833.815	1390.16	96461	8.36252	2.46598	0.0893369	2.64549	1.47231	3.61658	0.119581	2.46598	0.681854	1410.53	50.6275	728.153	33.8692	919.078	42.8218	48.3774	20.7735	148.103	648.51	Anchored	706	33
2013-07-01	Attom	NDR4	SD06A	84	-227.04	30317.7	2037.41	125.934	196.962	413055	12.6958	1.80979	0.0635936	2.15633	0.690332	2.81516	0.078766	1.80979	0.642875	727.189	45.7155	488.753	17.0144	533	23.0836	32.7887	8.30153	21.1636	221.422	Anchored	485	17
Sample N7-16S - White Nile, Wadelai, Uganda (modern river sand)
2013-09-17	Attom	NDR4	N7-16S	2	220.583	7.79676	3.90502	-8.96288	-1.15741	-0.578704	-0.0829683	76.984	0.0742124	59.3883	-123.274	97.2291	-12.0528	76.984	0.791779	1047.25	1197.48							0	1047.25	206 counts < 1000
2013-09-17	Attom	NDR4	N7-16S	38	89.2424	9.91954	11.569	17.4539	1.70068	0.833334	2.23297	100.018	-0.0937403	99.392	-5.78562	141.005	0.447835	100.018	0.709323			2385.62	3104.9					-2385.62	-5490.52	206 counts < 1000
2013-09-17	Attom	NDR4	N7-16S	9	134.012	19.3344	-1.76365	-22.7617	-1.15741	-0.578704	-0.0363791	38.5714	-0.0106154	486.328	40.2154	487.856	-27.4883	38.5714	0.0790631					3776.02	2389.52			1386.5	0	206 counts < 1000
2013-09-17	Attom	NDR4	N7-16S	41	9.16648	234.631	-59.6117	44.4631	INF	1600.85	7.09057	8.88813	-0.225958	5.37353	-4.39189	10.3862	0.141032	8.88813	0.855761			850.497	140.104					-850.497	-990.602	206 counts < 1000
2013-09-17	Attom	NDR4	N7-16S	44	31.8344	288.257	5.22466	-45.5402	-3.53357	3612.08	12.6825	7.12367	0.0257731	50.5337	0.280071	51.0334	0.0788489	7.12367	0.139588			489.248	66.7784	250.714	204.665		-95.1421	-443.2	-556.027	206 counts < 1000
2013-09-17	Attom	NDR4	N7-16S	82	84.9602	52.3145	-51.7445	130.018	-0.384025	-0.384025	-0.00840132	20.0952	1.02323	38.6559	-16785.3	43.5671	-119.029	20.0952	0.461247	5269.61	542.471							0	5269.61	IC Trip
2013-09-17	Attom	NDR4	N7-16S	83	-167.97	2554.2	-51.7445	763.979	771.369	23498.1	9.85657	3.69751	-0.0212638	5.97754	-0.297317	7.02869	0.101455	3.69751	0.526059			622.931	43.7612	-358.278	-62.2649		273.868	-918.944	-666.692	IC Trip
2013-09-17	Attom	NDR4	N7-16S	84	5048.14	5279083	-51.7445	742521	32372470	67787530	13.7421	2.89938	-9.74504e-06	3.15134	-9.77321e-05	4.28222	0.0727692	2.89938	0.677075			452.818	25.3071	-0.0992404	-0.00849983		456384	-452.909	-478.125	IC Trip
2013-09-17	Attom	NDR4	N7-16S	85	10.5287	107820	-51.7445	15.7005	-0.384025	1060110	10.2837	2.64526	-0.000460987	2.897	-0.00617795	3.92301	0.0972412	2.64526	0.674292			598.221	30.1542	-6.29245	-0.49536		9606.97	-604.018	-628.375	IC Trip
2013-09-17	Attom	NDR4	N7-16S	86	204.223	3367.45	-51.7445	6143.81	64.242	5677.22	1.62657	12.4497	-0.0201633	9.19121	-1.70842	15.475	0.614791	12.4497	0.804509			3089.16	583.854					-3089.16	-3673.01	IC Trip
2013-09-17	Attom	NDR4	N7-16S	87	-154.419	355575	-51.7445	2711.85	4090.71	3778476	11.102	2.86093	-0.000141336	2.22091	-0.00175452	3.62179	0.0900738	2.86093	0.789921			555.973	30.407	-1.78307	-0.12928		31280.6	-557.627	-586.38	IC Trip
2013-09-17	Attom	NDR4	N7-16S	88	-50.2479	1389.34	-51.7445	165.82	13.8004	12850.8	9.72655	4.55764	-0.0360587	4.17914	-0.510925	6.18363	0.102811	4.55764	0.737049			630.863	54.5493	-726.242	-140.468		186.867	-1216.64	-685.413	IC Trip
2013-09-17	Attom	NDR4	N7-16S	89	54322.9	1066451	-51.7445	2735798	125832	54884.3	0.0532206	3.03897	-4.70253e-05	2.19575	-0.121775	3.74922	18.7897	3.03897	0.81056			19243.6	361.672	-131.85	-10.6126		14695.1	-19364.8	-19605.3	IC Trip
2013-09-17	Attom	NDR4	N7-16S	90	91258.6	1737869	-51.7445	3207541	5554919	787357	0.449079	3.31756	-2.8668e-05	2.90609	-0.00879794	4.41039	2.22678	3.31756	0.752215			7551.87	288.613	-8.97281	-0.79529		84264	-7560.05	-7840.48	IC Trip
2013-09-17	Attom	NDR4	N7-16S	91	240.706	4679.11	-51.7445	2371.92	727.062	38440.8	8.77446	3.62669	-0.010865	3.21161	-0.170654	4.84431	0.113967	3.62669	0.748649			695.746	47.6605	-189.996	-20.4473		466.19	-865.295	-743.407	IC Trip
2013-09-17	Attom	NDR4	N7-16S	92	-136.713	74496.5	-51.7445	80.5158	27.9179	740988	10.5872	3.00245	-0.000682474	3.21367	-0.00888406	4.398	0.0944537	3.00245	0.682686			581.823	33.3214	-9.06103	-0.80089		6521.16	-590.084	-615.145	IC Trip
2013-09-17	Attom	NDR4	N7-16S	93	1178.4	27563.2	-51.7445	57651.3	38787.1	6801.07	0.263337	5.01444	-0.00219314	7.27645	-1.14778	8.83693	3.79742	5.01444	0.567441			10108.5	492.445					-10108.5	-10600.9	IC Trip
2013-09-17	Attom	NDR4	N7-16S	94	61.5962	27086.2	-51.7445	46.8119	-0.384025	278914	10.6088	3.38874	-0.00184443	2.98673	-0.0239608	4.51709	0.0942614	3.38874	0.750204			580.69	37.5262	-24.6256	-2.25442		2458.07	-603.062	-618.217	IC Trip
2013-09-17	Attom	NDR4	N7-16S	95	-67.3737	3954.61	-51.7445	62.3466	-0.384025	38300.9	9.90109	3.76872	-0.0125694	3.31916	-0.17496	5.02196	0.100999	3.76872	0.750448			620.26	44.4196	-195.281	-21.8606		417.624	-793.681	-664.68	IC Trip
2013-09-17	Attom	NDR4	N7-16S	81.1	128400	2230266	-72.5958	5603778	224047	67803.3	0.0303885	4.37104	-3.33657e-05	4.57283	-0.15132	6.32588	32.9072	4.37104	0.690977			22714.8	524.963	-166.597	-23.1675		13734.5	-22858.2	-23239.7	IC Trip
2013-09-17	Attom	NDR4	N7-16S	81.11	84354.3	1588984	-72.5958	3067945	4658919	669493	0.481948	2.97411	-4.39029e-05	2.34418	-0.0125545	3.78689	2.07491	2.97411	0.78537			7241.11	253.687	-12.8283	-0.978222		56546.3	-7252.96	-7494.79	IC Trip
2013-09-17	Attom	NDR4	N7-16S	81.12	-121.321	4353.62	-72.5958	2378.13	943.217	32161.8	8.59629	3.65073	-0.015842	3.19192	-0.253983	4.84935	0.116329	3.65073	0.752828			709.401	48.8627	-297.514	-34.0933		338.443	-972.822	-758.264	IC Trip
2013-09-17	Attom	NDR4	N7-16S	81.13	2.8061	70898.3	-72.5958	314.673	244.222	717919	11.364	3.41282	-0.000996346	3.25086	-0.0120833	4.71332	0.0879972	3.41282	0.724079			543.682	35.49	-12.3439	-1.17139		4504.46	-554.854	-579.172	IC Trip
2013-09-17	Attom	NDR4	N7-16S	81.14	825.642	15578.2	-72.5958	30998.9	26187.3	5699.51	0.42755	4.22781	-0.00449039	3.43186	-1.44745	5.44537	2.33891	4.22781	0.776405			7772.08	370.952					-7772.08	-8143.03	IC Trip
2013-09-17	Attom	NDR4	N7-16S	81.15	13.8748	28440.1	-72.5958	139.468	18.03	279795	11.4443	3.49708	-0.00249125	3.58263	-0.0300008	5.00648	0.0873794	3.49708	0.698511			540.02	36.1297	-30.9286	-3.1494		1846.02	-567.799	-576.149	IC Trip
2013-09-17	Attom	NDR4	N7-16S	81.03	128.772	32.0015	5.67035	8.20959	-1.83554	-0.734215	-0.0267766	23.5658	0.0806548	65.5278	-415.128	69.6365	-37.3461	23.5658	0.338412	1213.05	1289.35							0	1213.05	206 counts < 1000
2013-09-17	Attom	NDR4	N7-16S	81	-111.721	17.1766	-1.3587	-14.3922	-0.384025	-0.384025	-0.0235588	35.0271	-0.0887956	90.995	519.45	97.5038	-42.447	35.0271	0.359238					6350.91	1097.18			5253.73	0	206 counts < 1000
2013-09-17	Attom	NDR4	N7-16S	27	76.3516	77.5514	37.377	83.024	-1.69205	475.17	4.91153	14.4772	0.101697	71.5795	2.85364	73.0289	0.203603	14.4772	0.19824	1655.33	1326.12	1194.64	308.254	1369.77	744.398	27.8303	12.785	-569.273	152.428	206 counts < 1000
2013-09-17	Attom	NDR4	N7-16S	28	19.2438	325.889	58.5113	115.533	65.684	3177.04	10.3204	5.71802	0.192642	7.62011	2.57253	9.5269	0.0968956	5.71802	0.600198	2764.85	125.062	596.19	64.7961	1292.86	130.55	78.4368	53.886	566.12	2103.86	206 counts < 1000
2013-09-17	Attom	NDR4	N7-16S	64	-10.4317	-9.25648	-5.10908	-8.59136	-0.936331	0.612746	-159.668	100.018	0.140065	37.3926	-0.120897	106.779	-0.00626299	100.018	0.93668	2228.01	647.473	-40.5008	-81.7878	-130.835	-353.053	101.818	69.0445	262.719	2350.3	206 counts < 1000
2013-09-17	Attom	NDR4	N7-16S	65	-11.2742	-12.2947	-2.29789	-3.39517	-0.936331	0.566894	-36942.5	100.018	0.0574439	62.7158	-0.000214301	118.055	-2.70691e-05	100.018	0.847219	508.618	1379.03	-0.174501	-0.349079	-0.217621	-0.514008	100.034	19.8142	0.470888	509.141	206 counts < 1000
2013-09-17	Attom	NDR4	N7-16S	6	-44.9558	189.768	50.4387	85.2978	-1.15741	1307.45	6.98548	7.87028	0.328228	8.56158	6.47568	11.6294	0.143154	7.87028	0.67676	3608.83	131.314	862.474	125.832	2042.6	186.373	76.101	57.7757	993.754	2620.52	206 counts < 1000
2013-09-17	Attom	NDR4	N7-16S	57	147.167	7.10689	5.62611	0.149421	-0.936331	4.04531	61.6575	106.263	0.122683	45.0601	0.274223	115.422	0.0162186	106.263	0.920648	1995.6	800.85	103.713	215.027	246.064	409.53	94.8029	57.8512	-267.179	1676.86	206 counts < 1000
2013-09-17	Attom	NDR4	N7-16S	79	-48.5201	91.3492	42.2793	72.2653	-1.70765	328.22	3.88277	15.7846	0.249025	22.0643	8.83908	27.1291	0.257548	15.7846	0.581834	3178.58	349.485	1477.29	403.869	2321.53	403.161	53.5237	36.366	441.086	1297.42	206 counts < 1000
2013-09-17	Attom	NDR4	N7-16S	47	417.546	10075.4	6137.71	12375.4	14895.2	56396.8	5.78195	2.84025	0.535691	3.25374	12.7687	4.31901	0.172952	2.84025	0.657615	4342.56	47.6924	1028.36	53.7696	2662.74	78.2451	76.3191	61.3797	1556.14	3260.43	7/6 > 0.5
2013-09-17	Attom	NDR4	N7-16S	68	42.7412	998.837	672.995	1526.7	437.134	3068.14	3.14408	4.02727	0.673647	3.34781	29.5287	5.23705	0.318058	4.02727	0.768995	4675.5	48.2348	1780.24	124.092	3471.26	97.9849	61.9241	48.7149	1593.03	2771.17	7/6 > 0.5
2013-09-17	Attom	NDR4	N7-16S	71	14.3954	893.552	512.522	1135.25	63.652	2924.14	3.52504	4.39615	0.581403	3.52719	22.731	5.63624	0.283685	4.39615	0.779979	4462.2	51.3708	1609.89	124.055	3215.5	104.111	63.9215	49.9333	1501.49	2728.25	7/6 > 0.5
2013-09-17	Attom	NDR4	N7-16S	76	3130.26	60433.4	48699.3	120465	93478.2	57587.2	0.988456	3.59615	0.767201	1.80686	106.969	4.02455	1.01168	3.59615	0.893553	4862.03	25.804	4505.85	229.05	4753.86	77.9056	7.32584	5.21716	170.111	127.134	7/6 > 0.5
2013-09-17	Attom	NDR4	N7-16S	81.07	-81.7098	915.734	713.782	1771.22	415.242	1415.95	1.69468	4.39485	0.796995	3.52138	64.8149	5.63159	0.590083	4.39485	0.780392	4916.38	50.1653	2989.76	206.917	4251.25	106.807	39.1878	29.6735	1154.69	1719.7	7/6 > 0.5
2013-09-17	Attom	NDR4	N7-16S	81.09	75.8053	3135.7	1804.15	4106.64	3095.51	12867.8	4.91237	3.03394	0.542754	3.27603	15.2271	4.46511	0.203568	3.03394	0.679478	4361.75	47.969	1194.46	65.8226	2829.55	81.7102	72.6152	57.7863	1553.38	3101.47	7/6 > 0.5
2013-09-17	Attom	NDR4	N7-16S	45	128044	2283690	1623852	4807104	574013	71837.6	0.0331708	2.41241	0.699989	2.58907	2908.31	3.53879	30.147	2.41241	0.681705	4730.7	37.2035	22167.4	294.224	8098.36	69.4122	-368.586	-173.727	-14138.4	-17730.9	7/6 > 0.5
2013-09-17	Attom	NDR4	N7-16S	22	145.08	1188.91	1018.29	2476.27	2019.22	1073.82	0.891324	6.14211	0.819037	3.63627	126.641	7.13778	1.12193	6.14211	0.860506	4955.21	51.712	4849.79	405.661	4923.82	134.501	2.1273	1.50335	-60.4788	-300.249	7/6 > 0.5
2013-09-17	Attom	NDR4	N7-16S	81.05	4478.33	218262300	275602	669170	23717060	37096400	0.216673	17.5817	0.0941102	12.5198	59.8602	21.5838	4.61525	17.5817	0.814578	1510.33	236.384	11123.2	1636.59	4171.78	359.323	-636.477	-166.63	-7310.74	-11249.5	Huge uncertainty
2013-09-17	Attom	NDR4	N7-16S	4	29.3137	122185	7517.98	-2.04272	-1.15741	1261094	10.7391	2.43934	0.0592946	1.83028	0.760941	3.04964	0.0931173	2.43934	0.799877	577.928	39.7744	573.947	26.7352	574.553	26.4152	0.688915	0.105478	-25.8091	-22.7537	Conc within unc.	573.947	26.7352
2013-09-17	Attom	NDR4	N7-16S	5	-71.9862	244470	15491.5	-6.76806	-1.15741	2435158	10.3404	2.37478	0.0611533	1.82397	0.815055	2.99441	0.0967076	2.37478	0.793073	644.632	39.1976	595.086	26.9423	605.286	26.9459	7.686	1.68521	-16.7455	22.6041	Conc within unc.	595.086	26.9423
2013-09-17	Attom	NDR4	N7-16S	7	-181.585	522050	32755.2	-1.31626	-1.15741	5401165	10.7202	2.57278	0.0605398	1.74814	0.778294	3.1105	0.0932818	2.57278	0.827129	622.923	37.7038	574.917	28.24	584.51	27.2762	7.7065	1.64118	-17.6833	19.7656	Conc within unc.	574.917	28.24
2013-09-17	Attom	NDR4	N7-16S	11	-109.568	117832	7301.84	-27.722	9.06273	1180886	10.4631	2.39652	0.0595363	2.05216	0.784201	3.1551	0.095574	2.39652	0.75957	586.763	44.5298	588.418	26.898	587.877	27.7781	-0.282166	-0.0921069	-28.3196	-28.5537	Conc within unc.	588.418	26.898
2013-09-17	Attom	NDR4	N7-16S	15	-17.8576	62786.3	4088.47	264.609	-1.15741	669213	11.0967	2.30091	0.0621025	1.98709	0.771299	3.04018	0.0901172	2.30091	0.756833	677.641	42.4707	556.23	24.477	580.508	26.534	17.9167	4.18215	-2.25636	96.9336	Conc within unc.	556.23	24.477
2013-09-17	Attom	NDR4	N7-16S	16	31.6214	18615.6	1166.43	6.42854	-1.69205	184237	10.4662	2.52119	0.0615899	2.07177	0.811012	3.26322	0.0955459	2.52119	0.772608	659.899	44.4103	588.253	28.2867	603.022	29.2511	10.8571	2.4491	-14.4825	43.3594	Conc within unc.	588.253	28.2867
2013-09-17	Attom	NDR4	N7-16S	17	-87.5137	32164.4	2006.36	25.554	53.6242	335859	10.7679	2.68649	0.0596294	2.13253	0.763197	3.43	0.0928689	2.68649	0.783232	590.153	46.2475	572.482	29.3661	575.853	29.7112	2.99439	0.585391	-26.3402	-11.6946	Conc within unc.	572.482	29.3661
2013-09-17	Attom	NDR4	N7-16S	20	27.5573	40524.3	2698.17	48.4156	211.612	347330	9.00947	2.32309	0.0641153	1.90501	0.980773	3.0043	0.110994	2.32309	0.773254	745.437	40.2678	678.52	29.8536	694.002	29.7684	8.97694	2.23076	-14.2869	37.0639	Conc within unc.	678.52	29.8536
2013-09-17	Attom	NDR4	N7-16S	21	-216.93	106035	6497.49	19.9067	-1.69205	1087507	10.7585	2.2982	0.0587268	1.78409	0.752297	2.90941	0.0929495	2.2982	0.789919	556.984	38.9079	572.957	25.1499	569.556	25.0541	-2.8679	-0.597114	-28.455	-41.1236	Conc within unc.	572.957	25.1499
2013-09-17	Attom	NDR4	N7-16S	23	-674.606	194839	12020	24.4112	-1.69205	1959997	10.6209	2.29624	0.0605346	1.82976	0.785503	2.93611	0.0941539	2.29624	0.782069	622.738	39.4655	580.057	25.4254	588.618	25.8982	6.8538	1.45438	-17.3374	17.2558	Conc within unc.	580.057	25.4254
2013-09-17	Attom	NDR4	N7-16S	24	-13.8826	408153	25048.2	42.247	63.2119	4227553	11.4423	4.63754	0.0596372	1.76165	0.718309	4.96087	0.0873953	4.63754	0.934825	590.436	38.2025	540.114	47.8766	549.668	41.2642	8.52278	1.7381	-31.7104	2.44495	Conc within unc.	540.114	47.8766
2013-09-17	Attom	NDR4	N7-16S	29	-39.9279	92334.9	6132.7	84.2146	10.8866	807699	9.19055	2.3771	0.0638846	1.84779	0.95799	3.0108	0.108807	2.3771	0.789525	737.813	39.1066	665.818	30.0046	682.255	29.483	9.75781	2.4091	-13.0469	41.9898	Conc within unc.	665.818	30.0046
2013-09-17	Attom	NDR4	N7-16S	30	60.9982	2794.84	179.287	46.4925	30.9877	25915.1	9.85388	2.98716	0.0627285	3.36273	0.877332	4.4979	0.101483	2.98716	0.664123	699.041	71.6205	623.093	35.3858	639.54	41.8138	10.8645	2.57175	-25.3664	40.5618	Conc within unc.	623.093	35.3858
2013-09-17	Attom	NDR4	N7-16S	31	16.8096	56261.4	3655.53	107.058	22.2277	561895	10.5509	2.47306	0.0628741	2.12388	0.821272	3.25989	0.0947784	2.47306	0.758634	703.974	45.1984	583.736	27.5447	608.758	29.4217	17.08	4.11038	-4.39944	92.6941	Conc within unc.	583.736	27.5447
2013-09-17	Attom	NDR4	N7-16S	33	-108.995	47481.5	2931.98	180.495	1287.69	490173	10.8934	2.49509	0.0603236	1.90984	0.763184	3.14213	0.0917985	2.49509	0.794077	615.203	41.2446	566.165	26.9909	575.845	27.2505	7.97103	1.68103	-17.5704	22.0471	Conc within unc.	566.165	26.9909
2013-09-17	Attom	NDR4	N7-16S	36	-146.08	166668	10330	18.2293	2.92398	1760578	11.0102	2.35733	0.060096	1.76196	0.752243	2.94304	0.0908253	2.35733	0.800983	607.033	38.103	560.416	25.2562	569.525	25.339	7.67953	1.59942	-16.23	21.361	Conc within unc.	560.416	25.2562
2013-09-17	Attom	NDR4	N7-16S	37	-200.08	1258.27	100.64	76.0173	142.571	7308.6	6.16788	9.95751	0.0785646	5.51468	1.75548	11.3826	0.16213	9.95751	0.874801	1161.19	109.33	968.604	176.662	1029.19	137.518	16.5851	5.88634	-76.9367	15.9215	Conc within unc.	968.604	176.662
2013-09-17	Attom	NDR4	N7-16S	39	-174.471	85261.4	5436.34	13.3788	19.0763	885115	10.8639	2.5463	0.0621168	1.86676	0.788006	3.15728	0.0920481	2.5463	0.806484	678.132	39.8956	567.639	27.6121	590.04	27.8715	16.2938	3.79666	-5.46961	82.8812	Conc within unc.	567.639	27.6121
2013-09-17	Attom	NDR4	N7-16S	40	50.4856	123884	7696.84	23.616	215.359	1317896	11.2233	2.40454	0.0609788	1.67481	0.748799	2.93032	0.0891006	2.40454	0.820571	638.485	36.0289	550.216	25.3128	567.527	25.1656	13.8248	3.05032	-7.85422	62.9562	Conc within unc.	550.216	25.3128
2013-09-17	Attom	NDR4	N7-16S	42	-94.6398	13403.8	819.081	-15.6963	-3.53357	147700	11.592	2.56105	0.0587049	2.14686	0.697944	3.34186	0.0862661	2.56105	0.766356	556.171	46.8258	533.416	26.1691	537.562	27.5199	4.09137	0.771267	-23.3738	-3.41407	Conc within unc.	533.416	26.1691
2013-09-17	Attom	NDR4	N7-16S	51	-13.0628	27034.5	1832.61	61.0549	-0.936331	236159	9.20339	2.50797	0.0654856	1.97568	0.980627	3.19268	0.108656	2.50797	0.785537	789.977	41.4627	664.936	31.6126	693.927	31.6039	15.8285	4.17784	-2.6127	93.4289	Conc within unc.	664.936	31.6126
2013-09-17	Attom	NDR4	N7-16S	55	-53.428	103956	6343.86	209.91	2210.2	1106116	11.4407	2.39527	0.0594248	1.90734	0.71585	3.06191	0.0874075	2.39527	0.78228	582.694	41.4158	540.186	24.7756	548.214	25.6156	7.29503	1.46436	-17.5878	17.7321	Conc within unc.	540.186	24.7756
2013-09-17	Attom	NDR4	N7-16S	54	45.9226	82530.5	5198.06	247.901	33.5755	882340	11.2734	2.41533	0.0613698	1.84431	0.750247	3.03896	0.0887041	2.41533	0.794788	652.219	39.5847	547.868	25.3224	568.367	26.1152	15.9994	3.60667	-5.61603	79.0286	Conc within unc.	547.868	25.3224
2013-09-17	Attom	NDR4	N7-16S	58	-62.3557	130877	7973.7	473.315	89.4895	1332858	10.5928	2.45638	0.0585673	1.9437	0.76199	3.13238	0.0944036	2.45638	0.784191	551.047	42.4314	581.528	27.2607	575.158	27.1433	-5.53147	-1.10762	-33.5138	-57.7417	Conc within unc.	581.528	27.2607
2013-09-17	Attom	NDR4	N7-16S	66	-467.863	329661	21684.9	870.84	59.2493	3225468	10.2398	2.33038	0.0623901	1.66765	0.839712	2.86561	0.0976583	2.33038	0.813222	687.506	35.5854	600.671	26.6758	618.987	26.2203	12.6305	2.95901	-7.90443	60.1597	Conc within unc.	600.671	26.6758
2013-09-17	Attom	NDR4	N7-16S	70	-6.69434	24577.2	1541.72	21.5653	-1.70765	233570	10.054	2.49601	0.0613347	2.03846	0.84076	3.22264	0.0994626	2.49601	0.774524	650.992	43.7609	611.259	29.0466	619.565	29.4599	6.10355	1.34064	-21.1537	10.687	Conc within unc.	611.259	29.0466
2013-09-17	Attom	NDR4	N7-16S	74	-116.923	100639	6322.3	71.9652	718.308	918090	9.59984	2.48517	0.0613621	1.87308	0.880932	3.11199	0.104168	2.48517	0.798577	651.952	40.2042	638.791	30.157	641.486	29.1752	2.01865	0.42007	-26.4805	-16.9964	Conc within unc.	638.791	30.157
2013-09-17	Attom	NDR4	N7-16S	75	-54.4909	139830	8886.25	76.1402	-1.70765	1451767	10.9386	2.33285	0.061964	1.91978	0.780701	3.02122	0.0914196	2.33285	0.772156	672.868	41.0643	563.927	25.1441	585.883	26.5489	16.1905	3.74752	-4.59273	83.7964	Conc within unc.	563.927	25.1441
2013-09-17	Attom	NDR4	N7-16S	80	-156.822	561872	35216.4	18.9663	-1.70765	6040022	11.1208	2.43034	0.06069	1.94633	0.752117	3.11364	0.0899212	2.43034	0.780546	628.265	41.9412	555.071	25.7996	569.452	26.7861	11.6501	2.52533	-12.4056	47.3939	Conc within unc.	555.071	25.7996
2013-09-17	Attom	NDR4	N7-16S	81.02	-152.214	629790	39555.1	20.0001	-1.83554	6507662	11.7429	2.78273	0.0605855	2.00807	0.71105	3.43161	0.085158	2.78273	0.810912	624.551	43.2982	526.837	28.0935	545.37	28.5545	15.6455	3.39819	-10.0218	69.6209	Conc within unc.	526.837	28.0935
2013-09-17	Attom	NDR4	N7-16S	77	-67.4763	300950	18988.8	1090.05	891.271	2961271	11.4851	4.94548	0.0607367	1.70474	0.728824	5.23105	0.0870694	4.94548	0.945408	629.921	36.725	538.182	50.8686	555.862	43.8243	14.5637	3.18078	-26.1435	40.8709	Conc within unc.	538.182	50.8686
2013-09-17	Attom	NDR4	N7-16S	81.06	150.676	112526	7084.53	33.4152	-1.83554	976683	9.91536	2.83958	0.0608477	2.28637	0.845749	3.64564	0.100854	2.83958	0.778898	633.854	49.2227	619.409	33.4531	622.313	33.3693	2.27879	0.466587	-30.4656	-19.0089	Conc within unc.	619.409	33.4531
2013-09-17	Attom	NDR4	N7-16S	81.08	-114.837	357208	22620.9	385.625	487.646	17832540	13.8845	6.36795	0.0615874	1.9915	0.61132	6.6721	0.0720229	6.36795	0.954415	659.812	42.6904	448.332	54.9241	484.392	50.1465	32.0516	7.44449	-14.086	156.556	Conc within unc.	448.332	54.9241
2013-09-17	Attom	NDR4	N7-16S	1	-84.2702	4652.24	422.506	342.877	-1.15741	43160.2	9.88985	3.14238	0.093326	3.78882	1.30053	4.92236	0.101114	3.14238	0.638388	1494.51	71.6876	620.933	37.0967	845.954	54.9935	58.4525	26.5997	170.028	836.482	Anchored	596	36
2013-09-17	Attom	NDR4	N7-16S	3	84.9006	947.352	77.7373	61.6746	248.844	8918.12	10.1436	3.47519	0.0795975	4.76248	1.08147	5.8956	0.0985846	3.47519	0.589454	1187.03	94.0622	606.109	40.0822	744.351	60.375	48.9392	18.5722	77.8676	540.842	Anchored	592	40
2013-09-17	Attom	NDR4	N7-16S	8	52.608	40550.7	2740.46	588.818	120.055	414540	10.6413	2.87998	0.0648974	2.69979	0.840499	3.94755	0.0939732	2.87998	0.72956	771.011	56.8324	578.992	31.8172	619.421	35.9646	24.9048	6.5268	4.46375	160.201	Anchored	575	32
2013-09-17	Attom	NDR4	N7-16S	10	-105.499	18200.5	1470.08	815.969	358.811	177680	10.1553	2.47374	0.0777333	2.17263	1.05493	3.29238	0.0984712	2.47374	0.751354	1140.07	43.2067	605.443	28.5274	731.32	33.7564	46.894	17.2123	92.1202	506.096	Anchored	593	28
2013-09-17	Attom	NDR4	N7-16S	12	77.8922	82210.3	5473.4	1508.09	6942.79	793641	10.2898	2.51011	0.0647167	2.08482	0.866794	3.26299	0.0971838	2.51011	0.769265	765.138	43.9284	597.884	28.6016	633.825	30.3108	21.8594	5.67053	5.63047	138.653	Anchored	594	29
2013-09-17	Attom	NDR4	N7-16S	13	349.651	12458.6	5848.77	12797.7	3106.26	51334.6	4.32851	2.65051	0.458455	2.16783	14.597	3.42413	0.231027	2.65051	0.774067	4112.87	32.1919	1339.88	63.8147	2789.34	63.0774	67.4224	51.9644	1386.38	2709.18	Anchored	716	56
2013-09-17	Attom	NDR4	N7-16S	14	109.375	587.446	82.8532	73.4885	-1.15741	6004.93	10.5205	4.54901	0.146576	6.53779	1.92015	7.96468	0.095053	4.54901	0.571148	2306.36	112.26	585.352	50.7092	1088.12	101.146	74.6201	46.2051	401.621	1670.3	Anchored	524	48
2013-09-17	Attom	NDR4	N7-16S	18	16.1039	33766.8	3412.29	2937.82	10.4292	289803	8.98492	2.51494	0.0976334	3.47897	1.49758	4.2928	0.111298	2.51494	0.585851	1579.4	65.0895	680.279	32.3922	929.403	50.9712	56.9281	26.8047	198.152	866.732	Anchored	651	32
2013-09-17	Attom	NDR4	N7-16S	19	221.842	12858.7	4028.63	8473.45	3316.88	96431.6	7.90451	3.01332	0.299947	2.77273	5.22968	4.09489	0.12651	3.01332	0.735873	3469.95	42.95	767.925	43.4828	1857.47	67.5138	77.8693	58.6573	1022.03	2658.54	Anchored	548	36
2013-09-17	Attom	NDR4	N7-16S	25	55.2931	15620.4	2398.91	3868.04	362.99	142598	9.60006	2.51972	0.146845	2.71252	2.1081	3.70226	0.104166	2.51972	0.680589	2309.51	46.561	638.777	30.5746	1151.46	49.7553	72.3414	44.5244	462.924	1640.16	Anchored	572	28
2013-09-17	Attom	NDR4	N7-16S	26	-15.8091	4808.36	1047.42	1893.29	67.0783	35082.2	7.67006	3.04207	0.20209	3.04169	3.63121	4.30187	0.130377	3.04207	0.707152	2843.15	49.5677	790.016	45.0792	1556.4	66.2859	72.2134	49.2408	700.097	2008.06	Anchored	659	40
2013-09-17	Attom	NDR4	N7-16S	32	-33.4091	53987.1	3583.06	469.485	712.153	564139	10.9846	2.47948	0.0645712	1.97394	0.810141	3.16927	0.0910365	2.47948	0.782351	760.396	41.6239	561.664	26.6188	602.533	28.4039	26.1352	6.78281	12.4648	172.113	Anchored	558	27
2013-09-17	Attom	NDR4	N7-16S	34	-60.4151	17158.1	1143.63	174.604	318.526	182486	11.2563	2.55985	0.0640562	2.09143	0.784283	3.30559	0.0888394	2.55985	0.774401	743.488	44.2224	548.669	26.872	587.924	29.086	26.2033	6.67678	10.1684	167.946	Anchored	545	27
2013-09-17	Attom	NDR4	N7-16S	35	1.62976	6200.1	617.238	543.813	276.347	63507.3	10.8797	2.84	0.0972793	3.77262	1.23228	4.7221	0.0919145	2.84	0.601426	1572.6	70.6465	566.85	30.7486	815.378	51.6029	63.9547	30.4801	196.925	975.003	Anchored	541	30
2013-09-17	Attom	NDR4	N7-16S	43	-114.405	1989.77	574.223	1240.01	327.399	14695.1	8.10778	3.26242	0.302381	4.09248	5.13994	5.23372	0.123338	3.26242	0.623346	3482.46	63.3356	749.75	46.0176	1842.73	85.2897	78.4707	59.3132	1007.69	2686.7	Anchored	532	41
2013-09-17	Attom	NDR4	N7-16S	46	-32.8278	33081.3	2205.95	372.008	465.22	362642	11.5885	2.51013	0.064096	2.09588	0.762272	3.27008	0.0862925	2.51013	0.767604	744.799	44.3068	533.573	25.657	575.32	28.3259	28.3601	7.25625	13.4208	185.569	Anchored	530	26
2013-09-17	Attom	NDR4	N7-16S	48	-66.6368	9715.94	1265.89	1573.02	1819.17	90113.9	9.67077	3.14303	0.120717	6.9224	1.72033	7.60252	0.103404	3.14303	0.41342	1966.85	123.445	634.329	37.8639	1016.15	93.2221	67.7489	37.5752	288.598	1294.65	Anchored	588	38
2013-09-17	Attom	NDR4	N7-16S	52	-61.9889	4725.06	520.043	539.384	115.416	46640.3	10.4253	2.54504	0.108685	2.53906	1.43677	3.595	0.0959202	2.54504	0.707939	1777.49	46.322	590.455	28.6556	904.373	42.1584	66.7816	34.7111	271.76	1158.38	Anchored	555	27
2013-09-17	Attom	NDR4	N7-16S	53	73.789	23760.3	1563.54	132.387	10.9685	249967	10.9328	2.52284	0.0638839	2.22005	0.805315	3.36056	0.0914678	2.52284	0.75072	737.79	46.9854	564.212	27.2006	599.822	29.9953	23.5267	5.93681	5.61501	146.377	Anchored	561	27
2013-09-17	Attom	NDR4	N7-16S	56	72.9726	93134.8	6786.21	2438.65	4705.74	961600	10.992	2.34464	0.0701762	2.51094	0.879868	3.43543	0.0909748	2.34464	0.682488	933.514	51.5168	561.3	25.1584	640.911	32.1395	39.8724	12.4216	47.4717	347.056	Anchored	554	25
2013-09-17	Attom	NDR4	N7-16S	59	58.6076	48667.6	4324.07	3539.82	313.608	492730	10.7685	2.56089	0.0860504	3.03526	1.1013	3.97127	0.0928635	2.56089	0.644855	1339.32	58.6617	572.45	27.9947	753.977	41.4114	57.258	24.0759	140.115	738.87	Anchored	554	27
2013-09-17	Attom	NDR4	N7-16S	60	134.904	755.904	218.622	443.918	70.846	6035.01	8.58369	4.2022	0.304016	4.99478	4.88122	6.52735	0.1165	4.2022	0.643783	3490.81	77.2529	710.387	56.2852	1799.02	104.455	79.6498	60.5125	984.178	2724.13	Anchored	502	49
2013-09-17	Attom	NDR4	N7-16S	61	-100.26	462.247	138.165	255.931	-0.936331	3534	8.09702	4.70849	0.308476	5.11547	5.25052	6.95255	0.123502	4.70849	0.677233	3513.31	78.9911	750.69	66.3885	1860.86	112.171	78.633	59.6589	997.995	2696.23	Anchored	527	56
2013-09-17	Attom	NDR4	N7-16S	62	-119.151	40788.5	2684.35	409.603	-0.936331	430475	11.0094	2.34526	0.0637267	1.78771	0.797746	2.94892	0.0908316	2.34526	0.795294	732.574	37.8673	560.454	25.1288	595.556	26.2323	23.4953	5.89412	8.87048	146.991	Anchored	557	25
2013-09-17	Attom	NDR4	N7-16S	63	-72.0537	280439	21701.2	45577.3	655148	1836930	6.74972	2.13907	0.0738442	1.51674	1.50778	2.62224	0.148154	2.13907	0.815744	1037.21	30.629	890.609	35.4889	933.539	31.5225	14.1344	4.59864	11.4076	111.114	Anchored	885	36
2013-09-17	Attom	NDR4	N7-16S	67	402.93	12282	5427.02	12029.9	4827.94	74228.1	6.33104	3.01693	0.427346	2.37885	9.30273	3.84198	0.157952	3.01693	0.785254	4008.2	35.5478	945.385	52.8405	2368.29	68.1123	76.4137	60.0815	1354.79	3009.97	Anchored	531	43
2013-09-17	Attom	NDR4	N7-16S	69	64.5863	17463	2340.02	3268.36	2958.58	156544	9.41719	3.01445	0.128714	2.31429	1.88369	3.80038	0.106189	3.01445	0.793199	2080.48	40.7334	650.576	37.2008	1075.36	49.202	68.7295	39.5017	375.585	1392.7	Anchored	598	35
2013-09-17	Attom	NDR4	N7-16S	72	22.4262	1299.92	92.3225	-21.9931	-1.70765	14043.6	11.5791	3.49526	0.0706223	5.51232	0.840571	6.52706	0.0863628	3.49526	0.535503	946.5	112.869	533.99	35.7253	619.461	58.7982	43.5827	13.7975	26.6721	376.785	Anchored	526	36
2013-09-17	Attom	NDR4	N7-16S	73	109.423	4094.22	985.392	1889.57	3994.75	33293.2	8.64622	2.8721	0.225666	3.01656	3.59704	4.16516	0.115657	2.8721	0.689552	3021.56	48.4021	705.521	38.2737	1548.88	64.1172	76.6504	54.4495	779.239	2277.77	Anchored	566	34
2013-09-17	Attom	NDR4	N7-16S	78	778.554	113379	17140.7	26850.3	3105.68	1036603	9.952	2.41907	0.138809	3.78627	1.92226	4.49308	0.100482	2.41907	0.538399	2212.4	65.6725	617.235	28.4148	1088.86	58.3132	72.1011	43.3134	413.307	1566.75	Anchored	559	27
2013-09-17	Attom	NDR4	N7-16S	81.04	-27.0444	2531.74	243.622	229.679	88.371	24260	11.2601	2.95213	0.0942214	3.66441	1.15323	4.70563	0.0888094	2.95213	0.627361	1512.56	69.1667	548.492	30.9704	778.765	49.9321	63.7374	29.5691	180.342	933.094	Anchored	525	30
Sample N7-17S - White Nile, Murchison Falls, Uganda (modern river sand)
2012-08-14	Attom	NDR1	N7-17S	13	690.631	10431.3	6939.45	16851.8	-3.42466	31854.5	3.35011	3.98552	0.650947	2.78571	26.791	4.86257	0.298498	3.98552	0.819633	4625.41	40.2353	1683.86	117.053	3375.86	90.9925	63.5955	50.1206	1601.01	3058.6	7/6 > 0.5
2012-08-14	Attom	NDR1	N7-17S	15	59.317	108.696	48.6112	145.363	-3.42466	236.259	1.71841	26.0268	0.457014	27.6555	36.6693	37.9766	0.581932	26.0268	0.685338	4107.53	410.808	2956.63	1129.42	3684.67	562.037	28.0193	19.7586	166.003	2280.31	206 counts < 1000
2012-08-14	Attom	NDR1	N7-17S	24	58.1057	1030.84	625.402	1542.4	1170.01	3092.31	3.23021	5.23921	0.57209	5.05825	24.4194	7.28253	0.309577	5.23921	0.719422	4438.01	73.7633	1738.63	157.735	3285.28	132.973	60.8242	47.0783	1413.68	2857.12	7/6 > 0.5
2012-08-14	Attom	NDR1	N7-17S	29	195.978	485.87	427.888	1032.55	123.915	121.386	0.288059	12.1161	0.832506	8.04692	398.481	14.5449	3.47152	12.1161	0.833016	4977.75	114.322	9654.97	1111.24	6082.31	258.692	-93.9626	-58.7385	-3831.35	-3565.99	206 counts < 1000
2012-08-14	Attom	NDR1	N7-17S	4	57.9605	10982.1	675.008	142.03	38.8168	106081	10.5445	2.55878	0.0606667	2.96714	0.793279	3.91807	0.0948363	2.55878	0.653071	626.467	63.9574	584.076	28.5131	593.03	34.601	6.7667	1.50987	-25.6471	70.9043	Conc within unc.	584.076	28.5131
2012-08-14	Attom	NDR1	N7-17S	8	-20.2945	3462.13	237.501	58.6959	9.58905	33199.9	10.4387	2.78062	0.0654764	4.48106	0.86485	5.27369	0.0957977	2.78062	0.527264	788.736	94.0607	589.735	31.2652	632.767	48.4908	25.2304	6.80068	-5.45837	230.267	Conc within unc.	589.735	31.2652
2012-08-14	Attom	NDR1	N7-17S	9	144.294	8220.5	518.06	189.466	807.082	73835.5	9.85238	2.55958	0.0625347	2.62482	0.875148	3.66622	0.101498	2.55958	0.698154	691.487	55.9734	623.184	30.3368	638.359	34.1662	9.87773	2.37717	-18.9913	98.6401	Conc within unc.	623.184	30.3368
2012-08-14	Attom	NDR1	N7-17S	11	26.2675	35711.9	2256.11	180.125	31.0992	315090	9.63437	2.51894	0.061765	1.73789	0.883935	3.06029	0.103795	2.51894	0.823108	665.017	37.2219	636.611	30.4669	643.106	28.7484	4.27144	1.00983	-22.2541	58.8727	Conc within unc.	636.611	30.4669
2012-08-14	Attom	NDR1	N7-17S	14	-36.1784	9669.34	630.928	117.255	67.7293	89266.1	10.0092	2.7614	0.0638306	4.01921	0.879289	4.87641	0.0999083	2.7614	0.566277	735.07	85.1005	613.871	32.2578	640.599	45.3078	16.4881	4.17225	-18.5804	153.457	Conc within unc.	613.871	32.2578
2012-08-14	Attom	NDR1	N7-17S	17	72.1603	17634.8	1098.8	145.677	-1.58371	157557	9.9344	2.5923	0.0646616	3.24422	0.897442	4.15271	0.10066	2.5923	0.624243	762.398	68.3879	618.278	30.4938	650.36	39.1233	18.9035	4.93296	-7.04135	174.614	Conc within unc.	618.278	30.4938
2012-08-14	Attom	NDR1	N7-17S	18	8.76349	567.567	39.3191	25.8067	-1.58371	4938.13	9.56125	5.30399	0.0739786	13.6086	1.06682	14.6057	0.104589	5.30399	0.363145	1039.98	274.698	641.245	64.4263	737.181	142.6	38.3404	13.0139	-46.6635	463.157	Conc within unc.	641.245	64.4263
2012-08-14	Attom	NDR1	N7-17S	19	30.5381	21462.1	1316.85	9.25962	-1.58371	197481	10.0387	2.52602	0.060466	2.1874	0.830495	3.34148	0.0996149	2.52602	0.755958	619.322	47.2061	612.152	29.4358	613.887	30.3295	1.15782	0.282653	-28.5943	36.6065	Conc within unc.	612.152	29.4358
2012-08-14	Attom	NDR1	N7-17S	20	-63.6183	4880.43	321.858	75.4756	-1.58371	43304.2	9.63095	3.01792	0.0645419	4.17534	0.924004	5.15183	0.103832	3.01792	0.585797	758.489	88.0713	636.827	36.4968	664.475	49.041	16.0401	4.161	-21.3921	158.16	Conc within unc.	636.827	36.4968
2012-08-14	Attom	NDR1	N7-17S	21	-45.3627	12283.1	765.275	18.5141	-1.58371	109612	9.78864	2.64168	0.0611265	2.45134	0.861011	3.60382	0.102159	2.64168	0.733022	642.723	52.6965	627.05	31.492	630.674	33.3074	2.43847	0.574658	-29.6831	47.1646	Conc within unc.	627.05	31.492
2012-08-14	Attom	NDR1	N7-17S	23	-91.9037	22831.6	1372.84	27.9344	-1.58371	200186	9.40242	2.48408	0.0581488	1.72355	0.852712	3.02346	0.106356	2.48408	0.821604	534.389	37.7321	651.548	30.7146	626.137	27.873	-21.924	-4.05844	-53.2844	-86.4446	Conc within unc.	651.548	30.7146
2012-08-14	Attom	NDR1	N7-17S	33	48.6056	25426.9	1525.13	215.842	596.228	208075	9.08406	2.68475	0.0587049	1.99583	0.891038	3.34533	0.110083	2.68475	0.802537	555.19	43.5389	673.23	34.2344	646.927	31.5165	-21.2611	-4.06584	-57.8195	-83.8051	Conc within unc.	673.23	34.2344
2012-08-14	Attom	NDR1	N7-17S	35	25.4022	2245.35	130.985	23.4493	-1.69492	19848.8	9.60538	3.0701	0.0573416	5.51645	0.823108	6.31322	0.104108	3.0701	0.486297	503.706	121.401	638.441	37.2152	609.781	56.2938	-26.7488	-4.70002	-84.9536	-97.5198	Conc within unc.	638.441	37.2152
2012-08-14	Attom	NDR1	N7-17S	37	-6.31441	14761.1	916.351	33.3419	-1.69492	132452	9.59004	2.63539	0.0604801	2.35664	0.869547	3.5354	0.104275	2.63539	0.74543	619.823	50.8544	639.412	32.005	635.321	32.8556	-3.16046	-0.643956	-36.9468	12.4157	Conc within unc.	639.412	32.005
2012-08-14	Attom	NDR1	N7-17S	1	-52.8213	7040.16	1547.42	2858.46	1509.11	52577.7	8.01085	3.8088	0.208796	3.74031	3.59373	5.33825	0.124831	3.8088	0.713493	2895.5	60.6702	758.308	54.2677	1548.15	81.4522	73.8108	51.0183	708.386	2191.45	Anchored	626	48
2012-08-14	Attom	NDR1	N7-17S	2	67.7851	9378.82	2302.29	4175.64	468.801	61833.1	6.75458	5.8677	0.24489	5.13564	4.99888	7.79774	0.148048	5.8677	0.752488	3151.31	81.5245	890.01	96.8261	1819.13	124.06	71.7575	51.0751	805.064	2358.13	Anchored	699	83
2012-08-14	Attom	NDR1	N7-17S	3	426.506	12043.8	3990.95	9562.7	5353.27	70655.7	6.36756	2.62969	0.331112	2.33088	7.16974	3.51401	0.157046	2.62969	0.748344	3621.55	35.7185	940.34	45.8546	2132.75	60.7711	74.0349	55.9095	1131.64	2727.06	Anchored	640	39
2012-08-14	Attom	NDR1	N7-17S	5	-119.01	8119	795.725	816.221	199.433	72372.3	9.5634	2.81414	0.0966816	3.33098	1.3939	4.3606	0.104565	2.81414	0.645356	1560.21	62.4779	641.108	34.256	886.354	50.2958	58.9088	27.6691	194.95	953.357	Anchored	614	33
2012-08-14	Attom	NDR1	N7-17S	6	-71.6899	3219.43	449.042	665.756	302.237	24708.7	8.3039	3.03336	0.140572	4.67292	2.33409	5.57112	0.120425	3.03336	0.544478	2233.48	80.8662	733.012	41.8981	1222.72	76.266	67.1808	40.0509	413.446	1542.37	Anchored	665	40
2012-08-14	Attom	NDR1	N7-17S	7	135.754	32852.2	2221.51	828.872	1579.18	295067	9.65114	2.52778	0.0670168	1.99108	0.957429	3.21778	0.103615	2.52778	0.785567	837.36	41.4714	635.558	30.5255	681.964	31.4694	24.0999	6.80476	14.9366	232.328	Anchored	631	31
2012-08-14	Attom	NDR1	N7-17S	10	-183.943	12324.4	1012.52	628.942	140.435	108352	9.47018	2.65225	0.0807429	2.45497	1.17557	3.61404	0.105595	2.65225	0.733874	1214.31	48.2961	647.113	32.577	789.247	38.9029	46.7094	18.0088	103.231	599.774	Anchored	632	32
2012-08-14	Attom	NDR1	N7-17S	12	119.874	9063.55	1503.93	2572.82	617.779	65811.3	8.37335	3.07153	0.176694	6.42761	2.90953	7.12379	0.119427	3.07153	0.431165	2621.33	106.92	727.262	42.1103	1384.39	102.33	72.256	47.467	554.799	1936.18	Anchored	628	42
2012-08-14	Attom	NDR1	N7-17S	16	116.009	8964.91	3038.92	5595.95	259.464	56393.1	7.03198	2.94107	0.299115	3.40476	5.86492	4.49915	0.142207	2.94107	0.653695	3464.95	52.7596	857.133	47.0377	1956.06	75.2029	75.2627	56.1806	1023.72	2654.85	Anchored	615	42
2012-08-14	Attom	NDR1	N7-17S	22	-129.932	4451.52	337.952	84.7974	8.99322	39693.2	9.55387	3.13699	0.0745565	4.87991	1.07599	5.80122	0.10467	3.13699	0.540747	1055.66	98.2714	641.717	38.2087	741.674	59.2952	39.2121	13.4772	40.6617	452.157	Anchored	631	38
2012-08-14	Attom	NDR1	N7-17S	25	287.3	7512.87	1318.48	2336.9	466.453	58310.5	8.39187	2.32504	0.177974	2.7748	2.92415	3.62013	0.119163	2.32504	0.642255	2633.34	46.1041	725.744	31.8386	1388.18	53.3553	72.4401	47.7198	609.081	1939.43	Anchored	625	29
2012-08-14	Attom	NDR1	N7-17S	26	-25.5908	2662.07	213.607	144.728	9.59541	22655.6	9.22116	3.17197	0.079071	5.00158	1.18232	5.9226	0.108446	3.17197	0.53557	1173.02	98.9864	663.718	39.8871	792.391	63.1556	43.4182	16.2386	65.5175	549.193	Anchored	650	40
2012-08-14	Attom	NDR1	N7-17S	27	9.06117	5054.42	358.499	97.744	-1.69492	46261.8	9.86078	3.09261	0.0684964	5.0968	0.957763	5.96167	0.101412	3.09261	0.518748	882.682	105.403	622.678	36.6082	682.137	57.5648	29.4561	8.71658	1.89415	296.612	Anchored	617	37
2012-08-14	Attom	NDR1	N7-17S	28	178.079	17474.3	4104.88	8776.74	5416.19	121613	7.60605	2.71497	0.227374	2.27213	4.12176	3.54029	0.131474	2.71497	0.766878	3032.93	36.4224	796.27	40.5455	1658.63	56.2694	73.7459	51.9921	806.086	2277.21	Anchored	640	35
2012-08-14	Attom	NDR1	N7-17S	30	9.55219	1850.69	130.871	72.0056	-1.69492	16524.4	9.63379	3.26064	0.0710525	6.42273	1.01691	7.20301	0.103801	3.26064	0.452678	958.005	131.277	636.647	39.4126	712.36	71.1959	33.5444	10.6284	4.51641	360.77	Anchored	629	40
2012-08-14	Attom	NDR1	N7-17S	31	51.8228	31781.7	2306.67	764.842	69.2355	288517	9.70225	2.48655	0.0704975	2.10303	1.00185	3.25663	0.103069	2.48655	0.763533	941.958	43.0914	632.369	29.8856	704.749	32.5699	32.8666	10.2703	39.8103	339.475	Anchored	625	30
2012-08-14	Attom	NDR1	N7-17S	32	-145.024	630.29	60.7641	64.5692	-1.69492	5201.26	8.79002	4.62109	0.0945873	10.592	1.48369	11.5562	0.113765	4.62109	0.39988	1519.02	199.756	694.579	60.5713	923.741	131.321	54.2745	24.8081	97.8417	885.012	Anchored	668	61
2012-08-14	Attom	NDR1	N7-17S	34	-17.5951	7606.65	523.664	141.201	-1.69492	71518.6	10.2214	2.53996	0.0673213	3.00442	0.908124	3.93419	0.0978344	2.53996	0.64561	846.793	62.4841	601.705	29.1171	656.06	37.329	28.9431	8.28502	17.0257	274.205	Anchored	596	29
2012-08-14	Attom	NDR1	N7-17S	36	-21.3728	16511.7	1051.22	117.619	83.7705	146219	9.71718	2.41465	0.0633212	2.13272	0.898484	3.22166	0.102911	2.41465	0.749507	718.081	45.2822	631.443	28.9832	650.917	30.5003	12.0651	2.99172	-11.0266	115.621	Anchored	630	29
2012-08-14	Attom	NDR1	N7-17S	38	-55.1656	8662.44	679.665	340.396	-1.69492	75519.7	9.69043	2.62365	0.0760557	3.1699	1.08216	4.11483	0.103195	2.62365	0.637609	1095.64	63.4549	633.103	31.5642	744.686	42.5267	42.216	14.9839	69.0561	494.098	Anchored	621	31
Sample WD04A - Silica Glass area, Western Desert, Egypt (aeolian sand)
2014-06-05	Attom	NDR5	WD04A	10	-137.947	635.782	521.001	1440.57	-2.1605	133.447	0.460919	13.1523	0.973252	6.51562	291.009	14.6777	2.16958	13.1523	0.896071	5199.25	91.6975	7436.57	1067.27	5764.11	260.564	-43.0318	-29.0151	-1933.03	-3304.6	7/6 > 0.5
2014-06-05	Attom	NDR5	WD04A	2	117.412	698.745	409.113	967.322	-2.1605	1915.74	3.30099	6.19308	0.622909	4.5836	26.0068	7.70478	0.30294	6.19308	0.803797	4562.37	66.4128	1705.87	183.024	3346.79	140.489	62.61	49.0297	1500.43	2673.47	7/6 > 0.5
2014-06-05	Attom	NDR5	WD04A	20	97.0719	3020	1417.69	3292.94	353.764	10782.9	4.46764	4.26973	0.511038	3.0806	15.7645	5.26504	0.223832	4.26973	0.810958	4273.37	45.3272	1302.09	99.9031	2862.63	95.871	69.5301	54.5143	1464.67	2871.37	7/6 > 0.5
2014-06-05	Attom	NDR5	WD04A	22	38053	829750	619728	1472412	52943.9	1369289	1.94554	2.55423	0.740599	0.615832	52.4625	2.62742	0.513996	2.55423	0.972143	4811.58	8.81538	2673.67	110.842	4040.19	51.0534	44.4326	33.8232	1315.47	2027.07	7/6 > 0.5
2014-06-05	Attom	NDR5	WD04A	34	133.839	114.489	83.4467	263.676	24.0121	344.63	3.64187	13.2234	0.596732	14.3508	22.5819	19.5142	0.274584	13.2234	0.67763	4500.06	208.596	1564.03	357.199	3209.1	322.417	65.2443	51.2627	1322.65	2578.83	7/6 > 0.5
2014-06-05	Attom	NDR5	WD04A	40	521.916	7253.93	4586.76	12643.4	10414.2	18645	3.07651	6.05146	0.56955	2.74366	25.5141	6.64439	0.325044	6.05146	0.910763	4432.17	40.0225	1814.32	188.604	3328.1	122.187	59.0649	45.4849	1391.59	2429.25	7/6 > 0.5
2014-06-05	Attom	NDR5	WD04A	42	306.631	4319.03	3557.75	8904.59	116.46	812.931	0.25448	16.5282	0.873684	4.78748	473.158	17.2076	3.92958	16.5282	0.960518	5046.87	67.8104	10283.7	1507.76	6256.32	299.765	-103.763	-64.3723	-4327.1	-6744.55	7/6 > 0.5
2014-06-05	Attom	NDR5	WD04A	43	444.147	6755.99	5053.19	12556.6	3050.22	6801.89	1.27397	7.00347	0.751655	1.78392	81.3137	7.2271	0.784945	7.00347	0.969057	4832.78	25.5109	3734.97	385.329	4478.38	135.522	22.7158	16.6	607.891	712.477	7/6 > 0.5
2014-06-05	Attom	NDR5	WD04A	44	605.055	11657.6	9380.34	22712.7	3400.24	7906.16	0.759005	11.9476	0.643749	4.36711	116.89	12.7207	1.31751	11.9476	0.939223	4609.99	63.1245	5418.18	821.121	4843.13	228.407	-17.5312	-11.8736	-803.459	-1629.31	7/6 > 0.5
2014-06-05	Attom	NDR5	WD04A	45	201.748	1912.82	1584.47	4124.7	30.4384	2090.93	1.28145	5.57862	0.771241	2.89539	82.9456	6.28524	0.780364	5.57862	0.887574	4869.53	41.3354	3718.41	307.79	4498.32	118.879	23.6394	17.3379	661.033	843.336	7/6 > 0.5
2014-06-05	Attom	NDR5	WD04A	63	561.007	13962.3	10656.7	26471.8	8226.96	8848	0.839657	5.90193	0.750673	1.54064	123.212	6.0997	1.19096	5.90193	0.967577	4830.91	22.0338	5056.18	400.895	4896.17	115.989	-4.66323	-3.26815	-276.003	-626.172	7/6 > 0.5
2014-06-05	Attom	NDR5	WD04A	48	26788.9	509241	427861	1082214	193847	77618.5	0.195947	2.78784	0.829824	0.671014	583.651	2.86746	5.10342	2.78784	0.972234	4973.81	9.53472	11660.6	293.746	6469.02	56.5286	-134.44	-80.2528	-5248.1	-6980.53	7/6 > 0.5
2014-06-05	Attom	NDR5	WD04A	67	60.0387	692.633	348.99	1167.84	2752.58	2029.68	3.37737	4.54561	0.506141	3.80074	20.6538	5.92522	0.296088	4.54561	0.767164	4259.2	55.9676	1671.88	132.512	3122.48	108.735	60.7465	46.4567	1341.87	2454.8	7/6 > 0.5
2014-06-05	Attom	NDR5	WD04A	68	8239.99	158556	138600	333970	11897.7	22261.4	0.138023	8.0855	0.832893	0.906276	831.656	8.13613	7.24517	8.0855	0.993777	4979.05	12.8747	13599.5	856.511	6828.07	152.913	-173.135	-99.1711	-6924.38	-9476.99	7/6 > 0.5
2014-06-05	Attom	NDR5	WD04A	70	21.6015	1514.5	1326.67	3143.65	505.792	409.957	0.281862	8.24435	0.835918	3.19813	408.727	8.84293	3.54783	8.24435	0.93231	4984.2	45.4228	9764.07	780.05	6108.03	164.981	-95.9004	-59.8564	-3821.02	-5559.92	7/6 > 0.5
2014-06-05	Attom	NDR5	WD04A	74	2973.81	56002.4	44925.1	112609	24426	9333.79	0.196692	4.20335	0.829524	1.10873	581.231	4.34712	5.08409	4.20335	0.966928	4973.29	15.7547	11640.1	437.658	6464.81	84.5115	-134.053	-80.054	-5259.85	-7104.51	7/6 > 0.5
2014-06-05	Attom	NDR5	WD04A	81	15186.8	304027	245276	623431	249049	164548	0.662973	2.82055	0.811852	0.901595	168.767	2.96114	1.50836	2.82055	0.95252	4942.67	12.8289	5928.3	215.047	5213.41	58.0861	-19.9413	-13.7126	-772.982	-1200.68	7/6 > 0.5
2014-06-05	Attom	NDR5	WD04A	82	-163.347	111.989	86.1613	290.559	17.5015	84.061	-0.241738	42.9379	0.531065	19.2864	-302.768	47.0705	-4.13672	42.9379	0.912205	4329.84	282.891									206 counts < 1000
2014-06-05	Attom	NDR5	WD04A	18	-5.35572	712.172	49.1655	47.6678	20.1472	6334.54	10.8258	5.11468	0.0741506	11.1279	0.943974	12.247	0.0923719	5.11468	0.417627	1045.57	224.433	569.549	55.5219	674.96	114.111	45.5273	15.6173	-8.70024	420.497	206 counts < 1000
2014-06-05	Attom	NDR5	WD04A	19	-214.661	43.787	25.2316	50.1001	-2.1605	53.7479	-1.62071	268.516	0.0514605	149.001	-4.37598	307.086	-0.617013	268.516	0.874398	261.513	3421.75	-6186.98								206 counts < 1000
2014-06-05	Attom	NDR5	WD04A	78	-92.1405	88.1395	32.827	139.593	1544.27	136.519	1.51285	145.995	0.185364	30.9193	16.8863	149.233	0.661005	145.995	0.978301	2701.46	510.437	3271.06	4970.37	2928.4	1360.28	-21.0849	-11.701	-1702.94	-5539.97	206 counts < 1000
2014-06-05	Attom	NDR5	WD04A	58	-79.4287	45.1238	8.88052	32.5789	-4.62964	381.307	7.5879	17.9489	0.11236	81.6758	2.04077	83.6247	0.131789	17.9489	0.214636	1837.93	1479.07	798.062	263.983	1129.22	764.158	56.5782	29.3262	-433.001	775.883	206 counts < 1000
2014-06-05	Attom	NDR5	WD04A	16	103.537	101.692	67.2148	163.474	-2.1605	277.321	3.08745	19.5773	0.160483	76.7663	7.16368	79.2234	0.323892	19.5773	0.247115	2460.76	1297.29	1808.71	589.702	2131.99	884.858	26.498	15.1636	-561.571	62.3509	206 counts < 1000
2014-06-05	Attom	NDR5	WD04A	17	1981.02	74899.6	35153.6	83886.8	28076.5	268200	4.29644	2.92054	0.466168	1.5641	14.9534	3.313	0.232751	2.92054	0.88154	4137.63	23.1928	1348.9	70.7039	2812.28	61.1812	67.3992	52.0353	1402.2	2718.03	High Pbc
2014-06-05	Attom	NDR5	WD04A	29	218.461	323.976	38.2907	94.122	117.138	2295.07	7.33111	7.25748	0.197873	11.8012	3.71982	13.8542	0.136405	7.25748	0.523846	2808.73	192.91	824.301	111.346	1575.64	200.559	70.6522	47.6847	550.781	1873.08	High Pbc
2014-06-05	Attom	NDR5	WD04A	33	-67.1276	782.978	163.383	420.448	23.7603	3969.65	5.9876	9.44979	0.277624	7.66948	6.39013	12.1704	0.167012	9.44979	0.776455	3349.62	119.87	995.626	172.042	2030.91	193.948	70.2764	50.9765	841.34	2181.95	High Pbc
2014-06-05	Attom	NDR5	WD04A	37	-44.3547	627.91	51.0554	41.5309	-1.61291	4775.4	8.89888	5.11467	0.0865571	8.73417	1.34052	10.1215	0.112374	5.11467	0.505325	1350.65	168.536	686.518	66.2743	863.454	111.386	49.1714	20.4916	65.5504	597.861	High Pbc
2014-06-05	Attom	NDR5	WD04A	38	-120.163	766.75	103.48	371.517	3167.44	5688.31	8.29653	5.13724	0.145865	7.39377	2.42304	9.00328	0.120532	5.13724	0.570596	2298	127.07	733.627	70.8546	1249.46	121.814	68.0754	41.2843	394.016	1493.52	High Pbc
2014-06-05	Attom	NDR5	WD04A	49	-24.3771	267.987	74.8623	304.1	1006.17	184.769	0.863376	12.2137	0.24878	16.4703	39.712	20.5047	1.15824	12.2137	0.595653	3177.02	260.912	4959.19	794.094	3763.54	341.664	-56.0958	-31.7694	-1537.32	-2576.27	High Pbc
2014-06-05	Attom	NDR5	WD04A	52	119.879	625.489	52.5302	23.5579	-4.62964	5798.08	10.8765	4.88672	0.0916918	9.1657	1.16185	10.387	0.0919416	4.88672	0.470464	1461.01	174.206	567.01	52.832	782.822	107.47	61.1906	27.5685	108.342	841.169	High Pbc
2014-06-05	Attom	NDR5	WD04A	53	77.8636	622.21	164.229	480.616	1565.91	3329.19	5.96422	6.85141	0.324216	6.59648	7.4918	9.5108	0.167667	6.85141	0.720382	3589.95	101.308	999.241	125.608	2172.01	157.522	72.1656	53.9946	1015.24	2465.1	High Pbc
2014-06-05	Attom	NDR5	WD04A	76	163.128	519.237	104.56	288.241	333.949	3169.14	7.14185	5.41054	0.218387	8.81695	4.21427	10.3447	0.14002	5.41054	0.523026	2968.84	142.108	844.774	85.113	1676.8	156.999	71.5453	49.6199	675.029	2038.95	High Pbc
2014-06-05	Attom	NDR5	WD04A	77	21.5168	805.493	97.4715	88.943	2.29345	5917.02	8.38952	4.54444	0.126116	5.61185	2.07176	7.22113	0.119196	4.54444	0.629325	2044.52	99.1782	725.936	62.0999	1139.51	94.3794	64.4936	36.2942	319.198	1256.48	High Pbc
2014-06-05	Attom	NDR5	WD04A	1	-16.8728	16088.3	989.955	97.7242	25.1833	130774	9.91885	2.87767	0.0626919	1.52023	0.871077	3.25454	0.100818	2.87767	0.884199	697.797	32.3849	619.202	33.8898	636.152	30.3121	11.2633	2.66443	-13.3623	44.7054	Conc within unc.	619.202	33.8898
2014-06-05	Attom	NDR5	WD04A	4	-64.4025	10874.9	649.798	24.1574	-2.1605	91043.8	10.169	2.9722	0.0606959	1.85862	0.822598	3.50549	0.0983382	2.9722	0.84787	628.474	40.0497	604.663	34.2183	609.497	31.6317	3.78867	0.793074	-26.798	-10.4075	Conc within unc.	604.663	34.2183
2014-06-05	Attom	NDR5	WD04A	5	235.865	15022.3	1016.72	179.415	-2.1605	112119	8.76166	2.92387	0.0668134	1.86148	1.05095	3.46613	0.114134	2.92387	0.843552	831.961	38.8051	696.71	38.5021	729.354	35.443	16.257	4.47577	-2.79887	96.7495	Conc within unc.	696.71	38.5021
2014-06-05	Attom	NDR5	WD04A	6	60.9838	52473	3246.46	2.07107	-2.1605	437123	9.8347	2.72105	0.0600665	1.03247	0.841738	2.91035	0.101681	2.72105	0.934958	605.97	22.3314	624.251	32.2983	620.104	26.6588	-3.01692	-0.668783	-30.8059	-50.5799	Conc within unc.	624.251	32.2983
2014-06-05	Attom	NDR5	WD04A	9	-65.5312	3324.25	207.151	18.9863	-2.1605	29859.2	10.4504	3.37939	0.0590709	3.32056	0.77902	4.73776	0.0956904	3.37939	0.713288	569.712	72.2602	589.104	37.9392	584.924	41.2803	-3.40383	-0.714557	-45.4599	-57.3312	Conc within unc.	589.104	37.9392
2014-06-05	Attom	NDR5	WD04A	11	-298.193	16186.8	989.226	122.046	37.1253	122315	8.95247	2.90504	0.0605329	1.42333	0.931868	3.23498	0.111701	2.90504	0.898008	622.677	30.6996	682.619	37.5236	668.617	31.2046	-9.62655	-2.09418	-45.2067	-97.4659	Conc within unc.	682.619	37.5236
2014-06-05	Attom	NDR5	WD04A	12	66.2138	8657.43	542.586	49.8974	-2.1605	77523.1	10.4839	2.83548	0.0611331	2.01558	0.803633	3.47887	0.0953839	2.83548	0.815058	643.922	43.3205	587.3	31.7551	598.876	31	8.79328	1.93295	-19.424	24.8667	Conc within unc.	587.3	31.7551
2014-06-05	Attom	NDR5	WD04A	13	103.38	27828.8	1651.34	19.2372	-2.1605	251867	10.5234	2.85858	0.059078	1.26629	0.773704	3.1265	0.0950261	2.85858	0.914309	569.971	27.555	585.194	31.9038	581.885	27.3247	-2.67082	-0.568607	-30.6333	-47.1267	Conc within unc.	585.194	31.9038
2014-06-05	Attom	NDR5	WD04A	14	183.29	213096	25770.7	2496.72	635.88	492019	2.76336	2.76104	0.119204	0.827342	5.94508	2.88234	0.361878	2.76104	0.957919	1944.32	14.7928	1991.07	93.9028	1967.85	48.9084	-2.40428	-1.18009	-72.1307	-140.65	Conc within unc.	1991.07	93.9028
2014-06-05	Attom	NDR5	WD04A	23	-114.544	90935.6	5436.6	70.9122	44.8984	769492	9.84141	2.6182	0.0591469	0.832363	0.828287	2.74732	0.101611	2.6182	0.952999	572.508	18.1049	623.846	31.0612	612.661	24.9664	-8.96721	-1.82558	-36.151	-82.3992	Conc within unc.	623.846	31.0612
2014-06-05	Attom	NDR5	WD04A	26	42.8171	7304.23	450.862	57.1587	175.254	59729.1	9.5874	3.07203	0.0608314	1.85851	0.874446	3.59046	0.104304	3.07203	0.855608	633.279	40.0152	639.58	37.3016	637.978	33.4576	-0.995016	-0.251028	-35.0592	-43.6028	Conc within unc.	639.58	37.3016
2014-06-05	Attom	NDR5	WD04A	28	68.5629	101971	6138.61	446.501	7668.94	895192	10.6818	2.73412	0.0586228	0.966227	0.756356	2.89983	0.0936168	2.73412	0.942856	553.117	21.0856	576.892	30.1051	571.906	25.0483	-4.29825	-0.871835	-30.0344	-53.8795	Conc within unc.	576.892	30.1051
2014-06-05	Attom	NDR5	WD04A	30	26.4632	5938.77	365.163	19.703	20.4459	42843.9	8.82846	2.85591	0.060683	1.95743	0.947301	3.46233	0.11327	2.85591	0.824851	628.017	42.182	691.711	37.3549	676.696	33.641	-10.142	-2.21878	-48.6554	-101.048	Conc within unc.	691.711	37.3549
2014-06-05	Attom	NDR5	WD04A	31	-68.4088	12021.5	908.008	562.046	2842.82	72192.4	7.50721	3.16832	0.0706276	1.97152	1.29659	3.73164	0.133205	3.16832	0.849042	946.654	40.3674	806.125	47.8385	844.214	41.9069	14.8448	4.51176	-3.81795	92.6904	Conc within unc.	806.125	47.8385
2014-06-05	Attom	NDR5	WD04A	32	-211.471	57119.8	3449.56	272.659	403.308	497784	10.445	2.65771	0.0598622	1.01773	0.78986	2.8459	0.0957395	2.65771	0.933871	598.599	22.0398	589.393	29.8698	591.093	25.1891	1.53796	0.287614	-23.4891	-20.6636	Conc within unc.	589.393	29.8698
2014-06-05	Attom	NDR5	WD04A	35	-190.546	33455.4	2163.8	326.432	-1.61291	283116	10.1609	2.73757	0.0624215	1.3062	0.846662	3.03322	0.0984169	2.73757	0.902528	688.581	27.8676	605.125	31.5466	622.815	27.8558	12.1201	2.84041	-10.1653	51.9101	Conc within unc.	605.125	31.5466
2014-06-05	Attom	NDR5	WD04A	39	-233.445	15411.5	977.617	53.8229	-1.61291	115831	9.17057	2.80699	0.0632167	1.23466	0.95004	3.06653	0.109045	2.80699	0.915365	715.529	26.2254	667.197	35.4853	678.123	29.8948	6.75479	1.61132	-18.9681	12.8472	Conc within unc.	667.197	35.4853
2014-06-05	Attom	NDR5	WD04A	41	161.379	34324.1	2046.32	19.4945	-1.61291	325621	11.0867	2.62742	0.0584189	1.22472	0.726201	2.89884	0.0901981	2.62742	0.90637	545.507	26.761	556.709	27.9658	554.321	24.4685	-2.0534	-0.430772	-26.8563	-39.1673	Conc within unc.	556.709	27.9658
2014-06-05	Attom	NDR5	WD04A	46	-146.888	10687.5	646.2	59.0363	17.742	103862	11.4853	2.73077	0.0583709	1.70966	0.700421	3.2218	0.0870677	2.73077	0.847589	543.71	37.3687	538.172	28.1375	539.042	26.5987	1.01858	0.161506	-25.7282	-22.5994	Conc within unc.	538.172	28.1375
2014-06-05	Attom	NDR5	WD04A	50	22.326	29749.5	1850.95	129.389	-1.61291	224441	9.11703	2.77625	0.0621534	1.32798	0.939545	3.07751	0.109685	2.77625	0.902108	679.392	28.3751	670.917	35.2829	672.644	29.832	1.24736	0.256697	-28.1053	-26.8084	Conc within unc.	670.917	35.2829
2014-06-05	Attom	NDR5	WD04A	55	131.983	3822.1	234.775	59.2325	-4.62964	37728.4	11.9101	3.02813	0.0591005	2.74256	0.683881	4.08549	0.0839621	3.02813	0.741192	570.801	59.671	519.729	30.17	529.117	33.1485	8.94746	1.77438	-23.76	20.9022	Conc within unc.	519.729	30.17
2014-06-05	Attom	NDR5	WD04A	56	-281.679	2318	137.115	36.5988	-4.62964	20507.3	10.8242	3.59705	0.0604022	4.23827	0.769064	5.55893	0.0923855	3.59705	0.647076	618.014	91.4859	569.63	39.1025	579.226	47.927	7.82905	1.65674	-38.3307	9.2822	Conc within unc.	569.63	39.1025
2014-06-05	Attom	NDR5	WD04A	57	28.0741	78731.5	4802.6	12.23	-4.62964	656267	10.1059	2.66815	0.0602109	0.806588	0.821118	2.7874	0.098952	2.66815	0.957218	611.161	17.4307	608.264	30.9003	608.672	25.2072	0.473908	0.0669385	-24.7998	-28.004	Conc within unc.	608.264	30.9003
2014-06-05	Attom	NDR5	WD04A	61	-49.7283	2992.05	186.506	43.558	-4.62964	28399.7	11.3297	3.19294	0.0624643	3.61097	0.759832	4.82016	0.0882633	3.19294	0.662414	690.042	77.021	545.258	33.3014	573.913	41.4078	20.9819	4.99299	-12.7524	111.483	Conc within unc.	545.258	33.3014
2014-06-05	Attom	NDR5	WD04A	62	79.266	8105.59	493.437	34.2128	165.511	79377.6	11.4716	2.97885	0.0598054	1.80414	0.718495	3.4826	0.0871721	2.97885	0.855353	596.54	39.0839	538.791	30.7214	549.778	29.1468	9.68074	1.99848	-18.1596	27.0281	Conc within unc.	538.791	30.7214
2014-06-05	Attom	NDR5	WD04A	65	-292.023	22717.7	2027.54	100.883	-4.62964	74964.3	3.97681	2.85118	0.0869785	1.32227	3.01428	3.14287	0.251458	2.85118	0.90719	1360.02	25.4816	1445.99	73.4421	1411.24	46.8283	-6.32125	-2.46252	-81.5803	-159.412	Conc within unc.	1360.02	25.4816
2014-06-05	Attom	NDR5	WD04A	66	-39.2606	9443.02	543.63	21.2501	-4.62964	75122.4	9.22608	3.02656	0.0578385	2.33123	0.863983	3.8203	0.108388	3.02656	0.79223	523.649	51.129	663.381	38.0457	632.295	35.338	-26.6844	-4.91641	-66.4242	-177.778	Conc within unc.	663.381	38.0457
2014-06-05	Attom	NDR5	WD04A	71	78.7152	18308.2	1106.02	19.2242	-4.62964	141540	9.09337	2.76171	0.058734	1.24649	0.890165	3.02998	0.10997	2.76171	0.911462	557.249	27.1825	672.575	35.1807	646.458	28.5723	-20.6957	-4.04006	-54.6896	-150.507	Conc within unc.	672.575	35.1807
2014-06-05	Attom	NDR5	WD04A	72	-77.4439	36385.1	2283.11	25.9287	0.23148	290104	9.31129	2.71391	0.0617974	0.958839	0.914674	2.87831	0.107396	2.71391	0.942882	667.105	20.5292	657.61	33.8446	659.539	27.5464	1.42332	0.292521	-25.6171	-24.3496	Conc within unc.	657.61	33.8446
2014-06-05	Attom	NDR5	WD04A	73	-89.4177	6535.85	434.691	9.53064	-4.62964	54105.2	9.40671	2.95174	0.0637769	2.007	0.934397	3.56943	0.106307	2.95174	0.826951	734.24	42.5007	651.265	36.4657	669.946	34.4241	11.3007	2.78831	-15.7439	46.5087	Conc within unc.	651.265	36.4657
2014-06-05	Attom	NDR5	WD04A	75	-15.0023	6563.12	400.646	48.7911	-4.62964	59903.6	10.8023	3.07159	0.0587104	2.19582	0.749039	3.77575	0.0925728	3.07159	0.813505	556.375	47.892	570.735	33.467	567.667	32.3176	-2.58093	-0.540487	-35.3857	-47.8267	Conc within unc.	570.735	33.467
2014-06-05	Attom	NDR5	WD04A	80	-98.1458	91452.5	5687.54	17.1476	-4.62964	757053	9.98849	2.65471	0.0611347	0.876992	0.843516	2.79582	0.100115	2.65471	0.949529	643.975	18.8488	615.084	31.0728	621.084	25.6518	4.48638	0.966084	-19.6516	-2.18162	Conc within unc.	615.084	31.0728
2014-06-05	Attom	NDR5	WD04A	3	-136.102	10728.9	712.449	213.337	140.148	88935.2	9.8431	2.74825	0.0679152	1.4704	0.950914	3.11688	0.101594	2.74825	0.88173	865.968	30.4881	623.744	32.5951	678.579	30.3925	27.9715	8.08082	24.4421	209.629	Anchored	618	32
2014-06-05	Attom	NDR5	WD04A	7	-80.6233	13106.9	950.053	424.707	1349.34	107411	9.82177	2.75154	0.071173	1.52241	0.998692	3.14463	0.101815	2.75154	0.874996	962.387	31.0963	625.035	32.6982	703.146	31.4181	35.0537	11.1088	46.6929	304.654	Anchored	617	32
2014-06-05	Attom	NDR5	WD04A	8	82.9614	6067.32	581.757	726.555	2917.86	49719.6	9.83008	2.88497	0.0903967	2.73248	1.26736	3.9736	0.101729	2.88497	0.726035	1433.92	52.1254	624.531	34.2534	831.211	44.1318	56.446	24.8649	162.548	775.14	Anchored	602	33
2014-06-05	Attom	NDR5	WD04A	15	-129.302	2263.12	158.402	68.9164	-2.1605	19568.1	10.5997	3.46742	0.0706047	3.777	0.918006	5.12725	0.0943422	3.46742	0.676272	945.991	77.3429	581.166	38.4248	661.305	48.6512	38.5654	12.1183	31.4874	326.4	Anchored	573	38
2014-06-05	Attom	NDR5	WD04A	21	58.0595	1366.65	111.188	218.015	5951.34	10127.2	8.49553	3.79217	0.0787743	4.57293	1.27791	5.94073	0.117709	3.79217	0.638334	1166.47	90.5896	717.364	51.2847	835.922	65.5203	38.5012	14.1829	53.0381	397.82	Anchored	704	51
2014-06-05	Attom	NDR5	WD04A	25	15.7642	8723.73	547.649	101.844	-2.1605	80741	11.1376	2.8062	0.0639	1.73221	0.790703	3.29778	0.0897856	2.8062	0.850937	738.322	36.6575	554.269	29.7393	591.57	29.1489	24.9285	6.30552	8.15268	154.313	Anchored	551	30
2014-06-05	Attom	NDR5	WD04A	36	-36.3127	12261.1	893.967	421.18	19.3331	96198	9.51323	2.75584	0.0729709	2.12355	1.05713	3.47909	0.105117	2.75584	0.792113	1013.15	43.0396	644.326	33.7077	732.407	35.6731	36.4034	12.0263	52.4084	335.112	Anchored	635	33
2014-06-05	Attom	NDR5	WD04A	47	-232.867	3348.04	620.044	1070.62	-1.61291	22203.9	7.92034	3.15378	0.180314	2.46969	3.13756	4.0057	0.126257	3.15378	0.787321	2655.76	40.9471	766.478	45.4221	1441.95	59.8848	71.1391	46.8444	615.59	1843.86	Anchored	659	41
2014-06-05	Attom	NDR5	WD04A	51	-146.857	1888.62	235.075	539.704	152.151	14598.6	9.15382	4.71341	0.15485	8.83396	2.33138	10.0127	0.109244	4.71341	0.470741	2400.18	150.211	668.356	59.5725	1221.9	133.171	72.1539	45.3019	420.372	1672.25	Anchored	593	58
2014-06-05	Attom	NDR5	WD04A	54	76.2019	8039.49	1334.56	1550.46	80.964	55364.9	8.3385	4.17636	0.183792	7.34108	3.03769	8.44592	0.119926	4.17636	0.494483	2687.39	121.351	730.136	57.4029	1417.14	121.473	72.831	48.4783	565.534	1899.85	Anchored	624	55
2014-06-05	Attom	NDR5	WD04A	59	23.2601	2977.77	198.196	85.4219	-4.62964	30844.6	12.2847	3.10732	0.067371	4.11872	0.755814	5.15939	0.0814022	3.10732	0.602266	849.263	85.6253	504.487	30.0864	571.592	44.1289	40.5971	11.7401	22.9764	314.69	Anchored	498	30
2014-06-05	Attom	NDR5	WD04A	60	26.8417	6609.29	472.816	338.252	980.598	55414.9	10.0114	2.96884	0.0712237	2.0025	0.98047	3.58106	0.0998858	2.96884	0.829039	963.841	40.8931	613.74	34.6675	693.846	35.3793	36.3236	11.5453	44.7271	315.434	Anchored	606	34
2014-06-05	Attom	NDR5	WD04A	64	190.333	20331.1	1366.8	553.237	4804.61	160449	9.32838	2.70958	0.0664991	1.48504	0.98246	3.08985	0.1072	2.70958	0.87693	822.124	31.0061	656.464	33.7351	694.866	30.6296	20.1502	5.52646	7.77193	131.924	Anchored	652	34
2014-06-05	Attom	NDR5	WD04A	69	89.2954	34631.2	2373.49	940.479	191.583	278414	9.68244	2.65353	0.0699721	1.64974	0.99597	3.12455	0.10328	2.65353	0.849249	927.535	33.879	633.601	31.9466	701.762	31.1785	31.6898	9.71281	36.9823	261.987	Anchored	627	32
2014-06-05	Attom	NDR5	WD04A	79	181.708	1988.62	187.609	151.823	-4.62964	13524.5	7.77955	3.69421	0.0994714	5.38459	1.76218	6.53001	0.128542	3.69421	0.565728	1614.22	100.287	779.543	54.0227	1031.65	81.2602	51.7077	24.4372	170.846	780.653	Anchored	747	53
2014-06-05	Attom	NDR5	WD04A	24	-87.1724	751.259	72.6529	96.2747	-2.1605	7110.08	11.3854	4.49036	0.102899	6.68407	1.24557	8.05234	0.0878321	4.49036	0.557647	1677.06	123.489	542.703	46.5748	821.405	86.8784	67.6395	33.9299	191.824	1087.78	Anchored	513	45
2014-06-05	Attom	NDR5	WD04A	27	-138.805	743.607	55.9809	11.9344	-1.61291	5899.76	9.13254	4.76582	0.0758434	8.28539	1.14454	9.55828	0.109499	4.76582	0.498607	1090.94	165.972	669.835	60.3578	774.663	98.644	38.6002	13.5321	6.1838	360.748	Anchored	659	61
